# Supplementary material for: Alkylation Sensitivity Screens Reveal a Conserved Cross-species Functionome
Source: Oxford University Press journal article supplement (doi:10.1158/1541-7786.mcr-12-0168), 2012-10-04
Supplement: 15417786mcr120168-sup-dataset_4_xls_615k.xls [file 15417786mcr120168-sup-dataset_4_xls_615k.xls]

## Sheet: All data
AssayPlateID	WellName	Accession No	Gene Symbol	Full Gene Name	Avg_POC_Ratio	P-Value	FDR
Plate1	A01	NM_001619	ADRBK1	adrenergic, beta, receptor kinase 1	1.09814	0.324573	0.372483
Plate1	A02	NM_014826	CDC42BPA	CDC42 binding protein kinase alpha (DMPK-like)	1.0197	0.470567	0.478103
Plate1	A03	NM_007174	CIT	citron (rho-interacting, serine/threonine kinase 21)	1.01972	0.472668	0.479708
Plate1	A04	NM_144610	FLJ25006	FLJ25006	0.838397	0.196663	0.288104
Plate1	A05	NM_005308	GRK5	G protein-coupled receptor kinase 5	0.976536	0.440303	0.455742
Plate1	A06	NM_139209	GRK7	G protein-coupled receptor kinase 7	1.01154	0.468316	0.476517
Plate1	A07	NM_014572	LATS2	LATS, large tumor suppressor, homolog 2 (Drosophila)	0.963834	0.400356	0.426552
Plate1	A08	NM_032844	MASTL	microtubule associated serine/threonine kinase-like	0.97001	0.395542	0.422892
Plate1	A09	NM_213560	PKN1	protein kinase N1	0.968204	0.347962	0.388423
Plate1	A10	NM_013355	PKN3	protein kinase N3	1.11727	0.187309	0.281729
Plate1	A11	NM_207578	PRKACB	protein kinase, cAMP-dependent, catalytic, beta	0.758429	0.207187	0.29537
Plate1	A12	NM_002738	PRKCB1	protein kinase C, beta 1	1.05213	0.328725	0.37522
Plate1	A13	NM_002740	PRKCI	protein kinase C, iota	0.957882	0.34792	0.388455
Plate1	A14	NM_002744	PRKCZ	protein kinase C, zeta	0.80926	0.178904	0.278733
Plate1	A15	NM_006259	PRKG2	protein kinase, cGMP-dependent, type II	0.795576	0.357274	0.395697
Plate1	A16	NM_002760	PRKY	protein kinase, Y-linked	0.924725	0.181813	0.280103
Plate1	A17	NM_004850	ROCK2	Rho-associated, coiled-coil containing protein kinase 2	0.889615	0.133773	0.248045
Plate1	A18	NM_021135	RPS6KA2	ribosomal protein S6 kinase, 90kDa, polypeptide 2	0.737627	0.082767	0.20506
Plate1	A19	NM_003942	RPS6KA4	ribosomal protein S6 kinase, 90kDa, polypeptide 4	0.807382	0.132801	0.247323
Plate1	A20	NM_014496	RPS6KA6	ribosomal protein S6 kinase, 90kDa, polypeptide 6	0.767448	0.156309	0.263458
Plate1	A21	NM_012424	RPS6KC1	ribosomal protein S6 kinase, 52kDa, polypeptide 1	0.888066	0.0799668	0.202485
Plate1	A22	NM_005627	SGK	serum/glucocorticoid regulated kinase	0.892259	0.0484808	0.168523
Plate1	B01	NM_005160	ADRBK2	adrenergic, beta, receptor kinase 2	0.974437	0.432413	0.450107
Plate1	B02	NM_006035	CDC42BPB	CDC42 binding protein kinase beta (DMPK-like)	0.770811	0.158321	0.264508
Plate1	B03	NM_004409	DMPK	dystrophia myotonica-protein kinase	0.962521	0.341383	0.383561
Plate1	B04	NM_001004056	GRK4	G protein-coupled receptor kinase 4	0.656953	0.0349507	0.152392
Plate1	B05	NM_002082	GRK6	G protein-coupled receptor kinase 6	0.864281	0.131337	0.246592
Plate1	B06	NM_004690	LATS1	LATS, large tumor suppressor, homolog 1 (Drosophila)	0.921443	0.316331	0.366453
Plate1	B07	NM_015112	MAST2	microtubule associated serine/threonine kinase 2	0.832733	0.0665851	0.18868
Plate1	B08	NM_031268	PDPK1	3-phosphoinositide dependent protein kinase-1	0.767592	0.00142151	0.0747307
Plate1	B09	NM_006256	PKN2	protein kinase N2	0.878602	0.161769	0.267355
Plate1	B10	NM_002730	PRKACA	protein kinase, cAMP-dependent, catalytic, alpha	0.668819	0.0640933	0.186306
Plate1	B11	NM_002732	PRKACG	protein kinase, cAMP-dependent, catalytic, gamma	0.746046	0.0464448	0.166046
Plate1	B12	NM_005400	PRKCE	protein kinase C, epsilon	0.807654	0.113762	0.233184
Plate1	B13	NM_006257	PRKCQ	protein kinase C, theta	0.845082	0.128658	0.24355
Plate1	B14	NM_006258	PRKG1	protein kinase, cGMP-dependent, type I	0.807652	0.114358	0.233193
Plate1	B15	NM_005044	PRKX	protein kinase, X-linked	0.792097	0.127975	0.243341
Plate1	B16	NM_005406	ROCK1	Rho-associated, coiled-coil containing protein kinase 1	0.907714	0.188417	0.282625
Plate1	B17	NM_002953	RPS6KA1	ribosomal protein S6 kinase, 90kDa, polypeptide 1	0.92652	0.113891	0.233102
Plate1	B18	NM_004586	RPS6KA3	ribosomal protein S6 kinase, 90kDa, polypeptide 3	0.716527	0.0220012	0.130028
Plate1	B19	NM_182398	RPS6KA5	ribosomal protein S6 kinase, 90kDa, polypeptide 5	0.957399	0.252813	0.325449
Plate1	B20	NM_003952	RPS6KB2	ribosomal protein S6 kinase, 70kDa, polypeptide 2	0.849477	0.231785	0.310698
Plate1	B21	NM_031464	RPS6KL1	ribosomal protein S6 kinase-like 1	0.760945	0.124952	0.241251
Plate1	B22	NM_016276	SGK2	serum/glucocorticoid regulated kinase 2	0.611634	0.143532	0.255086
Plate1	C01	NM_170709	SGKL	serum/glucocorticoid regulated kinase-like	0.728265	0.117345	0.235887
Plate1	C02	NM_173575	STK32C	serine/threonine kinase 32C	0.76976	0.0731049	0.195513
Plate1	C03	NM_015000	STK38L	serine/threonine kinase 38 like	0.962283	0.294021	0.352671
Plate1	C04	NM_014840	ARK5	NUAK family, SNF1-like kinase, 1	0.879906	0.066425	0.188517
Plate1	C05	NM_153498	CAMK1D	calcium/calmodulin-dependent protein kinase ID	0.933927	0.289793	0.349271
Plate1	C06	NM_171825	CAMK2A	calcium/calmodulin-dependent protein kinase (CaM kinase) II alpha	0.915697	0.277184	0.340922
Plate1	C07	NM_172115	CAMK2D	calcium/calmodulin-dependent protein kinase (CaM kinase) II delta	0.707791	0.0742769	0.19627
Plate1	C08	NM_001744	CAMK4	calcium/calmodulin-dependent protein kinase IV	0.925781	0.223271	0.305518
Plate1	C09	NM_001274	CHEK1	CHK1 checkpoint homolog (S. pombe)	0.70073	0.00470957	0.0863681
Plate1	C10	NM_004938	DAPK1	death-associated protein kinase 1	0.878989	0.164003	0.268554
Plate1	C11	NM_001348	DAPK3	death-associated protein kinase 3	0.855888	0.109444	0.22936
Plate1	C12	NM_014586	HUNK	hormonally upregulated Neu-associated kinase	0.867188	0.0255127	0.136331
Plate1	C13	NM_032430	KIAA1811	BR serine/threonine kinase 1	0.946647	0.244221	0.319153
Plate1	C14	NM_004635	MAPKAPK3	mitogen-activated protein kinase-activated protein kinase 3	0.959293	0.259854	0.329443
Plate1	C15	NM_018650	MARK1	MAP/microtubule affinity-regulating kinase 1	0.885312	0.0424123	0.161571
Plate1	C16	NM_002376	MARK3	MAP/microtubule affinity-regulating kinase 3	0.789559	0.00828792	0.0969265
Plate1	C17	NM_014791	MELK	maternal embryonic leucine zipper kinase	0.85144	0.0308119	0.147129
Plate1	C18	NM_152619	MGC45428	doublecortin and CaM kinase-like 2	0.872166	0.133974	0.248333
Plate1	C19	NM_024046	MGC8407	CaM kinase-like vesicle-associated	0.796791	0.0380212	0.156042
Plate1	C20	NM_199054	MKNK2	MAP kinase interacting serine/threonine kinase 2	0.926574	0.0905271	0.211741
Plate1	C21	NM_033118	MYLK2	myosin light chain kinase 2, skeletal muscle	0.90088	0.184021	0.280685
Plate1	C22	NM_006213	PHKG1	phosphorylase kinase, gamma 1 (muscle)	0.76554	0.0473322	0.166948
Plate1	D01	NM_018401	STK32B	serine/threonine kinase 32B	0.826568	0.184987	0.281457
Plate1	D02	NM_007271	STK38	serine/threonine kinase 38	0.829592	0.0143373	0.110379
Plate1	D03	NM_005876	APEG1	aortic preferentially expressed gene 1	0.954849	0.345143	0.386214
Plate1	D04	NM_174944	C14orf20	chromosome 14 open reading frame 20	0.95372	0.173324	0.275164
Plate1	D05	NM_020439	CAMK1G	calcium/calmodulin-dependent protein kinase IG	0.99793	0.490952	0.493995
Plate1	D06	NM_172084	CAMK2B	calcium/calmodulin-dependent protein kinase (CaM kinase) II beta	0.847933	0.0682127	0.19094
Plate1	D07	NM_172173	CAMK2G	calcium/calmodulin-dependent protein kinase (CaM kinase) II gamma	0.830801	0.0731657	0.195581
Plate1	D08	NM_003688	CASK	calcium/calmodulin-dependent serine protein kinase (MAGUK family)	0.924019	0.185143	0.281385
Plate1	D09	NM_007194	CHEK2	CHK2 checkpoint homolog (S. pombe)	0.878682	0.169921	0.272584
Plate1	D10	NM_014326	DAPK2	death-associated protein kinase 2	0.975707	0.416325	0.439158
Plate1	D11	NM_004734	DCAMKL1	doublecortin and CaM kinase-like 1	0.837373	0.0451204	0.165053
Plate1	D12	NM_025164	KIAA0999	KIAA0999	0.786136	0.0319647	0.148025
Plate1	D13	NM_032960	MAPKAPK2	mitogen-activated protein kinase-activated protein kinase 2	0.953821	0.263273	0.331116
Plate1	D14	NM_139078	MAPKAPK5	mitogen-activated protein kinase-activated protein kinase 5	0.74619	0.042569	0.161721
Plate1	D15	NM_017490	MARK2	MAP/microtubule affinity-regulating kinase 2	0.822231	0.118903	0.237119
Plate1	D16	NM_031417	MARK4	MAP/microtubule affinity-regulating kinase 4	0.82821	0.126561	0.242071
Plate1	D17	NM_153361	MGC42105	MGC42105	0.874898	0.0840877	0.205929
Plate1	D18	NM_032017	MGC4796	serine/threonine kinase 40	0.918037	0.105148	0.226196
Plate1	D19	NM_198973	MKNK1	MAP kinase interacting serine/threonine kinase 1	0.933749	0.272748	0.33742
Plate1	D20	NM_053031	MYLK	myosin, light polypeptide kinase	0.899375	0.0405066	0.159826
Plate1	D21	NM_015148	PASK	PAS domain containing serine/threonine kinase	0.7334	5.8757e-05	0.0540564
Plate1	D22	NM_000294	PHKG2	phosphorylase kinase, gamma 2 (testis)	0.867875	0.220827	0.303603
Plate1	E01	NM_002648	PIM1	pim-1 oncogene	0.869597	0.265786	0.332534
Plate1	E02	NM_006251	PRKAA1	protein kinase, AMP-activated, alpha 1 catalytic subunit	0.702005	0.103529	0.224109
Plate1	E03	NM_002742	PRKCM	protein kinase D1	0.792288	0.0642693	0.186229
Plate1	E04	NM_016457	PRKD2	protein kinase D2	0.705287	0.0184887	0.121209
Plate1	E05	NM_033126	PSKH2	protein serine kinase H2	0.826095	0.0322992	0.148453
Plate1	E06	NM_173354	SNF1LK	SNF1-like kinase	0.895684	0.0597498	0.182725
Plate1	E07	NM_032037	SSTK	testis-specific serine kinase 6	0.955701	0.310797	0.363321
Plate1	E08	NM_004760	STK17A	serine/threonine kinase 17a (apoptosis-inducing)	0.969319	0.340228	0.383043
Plate1	E09	NM_053006	STK22B	serine/threonine kinase 22B (spermiogenesis associated)	0.796412	0.00823441	0.0967105
Plate1	E10	NM_032028	STK22D	serine/threonine kinase 22D (spermiogenesis associated)	0.857831	0.0380436	0.156018
Plate1	E11	NM_030906	STK33	serine/threonine kinase 33	0.745851	0.00440858	0.085688
Plate1	E12	NM_025195	TRIB1	tribbles homolog 1 (Drosophila)	0.868993	0.0884161	0.209646
Plate1	E13	NM_021158	TRIB3	tribbles homolog 3 (Drosophila)	0.908861	0.13027	0.245257
Plate1	E14	NM_133379	TTN	titin	0.902772	0.0745523	0.196621
Plate1	E15	NM_145203	CSNK1A1L	casein kinase 1, alpha 1-like	0.737551	0.0313154	0.147618
Plate1	E16	NM_152221	CSNK1E	casein kinase 1, epsilon	0.954694	0.257371	0.328104
Plate1	E17	NM_001319	CSNK1G2	casein kinase 1, gamma 2	0.899775	0.110877	0.230525
Plate1	E18	NM_173500	TTBK2	tau tubulin kinase 2	0.811207	0.0885322	0.209741
Plate1	E19	NM_006296	VRK2	vaccinia related kinase 2	0.957307	0.316889	0.366792
Plate1	E20	NM_139158	ALS2CR7	amyotrophic lateral sclerosis 2 (juvenile) chromosome region, candidate 7	0.877268	0.0166742	0.116361
Plate1	E21	NM_033492	CDC2L1	cell division cycle 2-like 1 (PITSLRE proteins)	0.82064	0.0703126	0.192427
Plate1	E22	NM_001258	CDK3	cyclin-dependent kinase 3	0.85573	0.0751622	0.197287
Plate1	F01	NM_006875	PIM2	pim-2 oncogene	0.992045	0.482489	0.487881
Plate1	F02	NM_006252	PRKAA2	protein kinase, AMP-activated, alpha 2 catalytic subunit	0.728872	0.144484	0.255872
Plate1	F03	NM_005813	PRKCN	protein kinase D3	0.861335	0.109622	0.229383
Plate1	F04	NM_006742	PSKH1	protein serine kinase H1	0.918429	0.080049	0.202507
Plate1	F05	NM_030952	SNARK	NUAK family, SNF1-like kinase, 2	0.774638	0.0631577	0.185343
Plate1	F06	NM_017719	SNRK	SNF related kinase	0.813165	0.141912	0.254006
Plate1	F07	NM_000455	STK11	serine/threonine kinase 11 (Peutz-Jeghers syndrome)	0.940217	0.207022	0.295363
Plate1	F08	NM_004226	STK17B	serine/threonine kinase 17b (apoptosis-inducing)	0.792318	0.0205683	0.126715
Plate1	F09	NM_052841	STK22C	serine/threonine kinase 22C (spermiogenesis associated)	0.743659	0.0462926	0.166148
Plate1	F10	NM_003957	STK29	BR serine/threonine kinase 2	0.873122	0.0401165	0.159541
Plate1	F11	NM_001024660	HAPIP	huntingtin-associated protein interacting protein (duo)	0.714379	0.026236	0.137143
Plate1	F12	NM_021643	TRIB2	tribbles homolog 2 (Drosophila)	0.852111	0.0227774	0.131106
Plate1	F13	NM_007118	TRIO	triple functional domain (PTPRF interacting)	0.825815	0.248058	0.322032
Plate1	F14	NM_001892	CSNK1A1	casein kinase 1, alpha 1	0.758153	0.0229043	0.131017
Plate1	F15	NM_139062	CSNK1D	casein kinase 1, delta	0.817599	0.190682	0.284016
Plate1	F16	NM_001011664	CSNK1G1	casein kinase 1, gamma 1	0.903213	0.10118	0.221809
Plate1	F17	NM_004384	CSNK1G3	casein kinase 1, gamma 3	0.875859	0.19098	0.284077
Plate1	F18	NM_003384	VRK1	vaccinia related kinase 1	0.821379	0.0596268	0.182855
Plate1	F19	NM_016440	VRK3	vaccinia related kinase 3	0.813539	0.187815	0.282183
Plate1	F20	NM_178432	CCRK	cell cycle related kinase	0.856399	0.0842146	0.205966
Plate1	F21	NM_003718	CDC2L5	cell division cycle 2-like 5 (cholinesterase-related cell division controller)	0.87051	0.157254	0.263522
Plate1	F22	NM_001259	CDK6	cyclin-dependent kinase 6	0.766842	0.122728	0.239554
Plate1	G01	NM_001260	CDK8	cyclin-dependent kinase 8	0.996171	0.492568	0.494629
Plate1	G02	NM_016508	CDKL3	cyclin-dependent kinase-like 3	0.868254	0.250555	0.323903
Plate1	G03	NM_004071	CLK1	CDC-like kinase 1	0.964046	0.349893	0.390184
Plate1	G04	NM_001292	CLK3	CDC-like kinase 3	1.00176	0.492447	0.494597
Plate1	G05	NM_016507	CRK7	CRK7	0.984195	0.393407	0.42118
Plate1	G06	NM_006484	DYRK1B	dual-specificity tyrosine-(Y)-phosphorylation regulated kinase 1B	0.938913	0.114008	0.232998
Plate1	G07	NM_003582	DYRK3	dual-specificity tyrosine-(Y)-phosphorylation regulated kinase 3	0.902215	0.199206	0.289753
Plate1	G08	NM_139021	ERK8	mitogen-activated protein kinase 15	0.790157	0.0326248	0.148343
Plate1	G09	NM_022740	HIPK2	homeodomain interacting protein kinase 2	0.854522	0.0642133	0.186165
Plate1	G10	NM_144685	HIPK4	homeodomain interacting protein kinase 4	0.889937	0.0938427	0.215032
Plate1	G11	NM_005906	MAK	male germ cell-associated kinase	0.736145	0.0342403	0.151205
Plate1	G12	NM_002969	MAPK12	mitogen-activated protein kinase 12	0.800001	0.0355213	0.153066
Plate1	G13	NM_002747	MAPK4	mitogen-activated protein kinase 4	0.9663	0.383509	0.413552
Plate1	G14	NM_002752	MAPK9	mitogen-activated protein kinase 9	0.994985	0.48346	0.488594
Plate1	G15	NM_033019	PCTK1	PCTAIRE protein kinase 1	0.800986	0.0611169	0.184152
Plate1	G16	NM_012395	PFTK1	PFTAIRE protein kinase 1	0.860301	0.0230736	0.131441
Plate1	G17	NM_014226	RAGE	renal tumor antigen	0.822577	0.0620921	0.18467
Plate1	G18	NM_003137	SRPK1	SFRS protein kinase 1	0.599583	0.00758775	0.0960651
Plate1	G19	NM_014370	STK23	serine/threonine kinase 23	0.84819	0.0633794	0.185304
Plate1	G20	NM_001018046	FLJ23074	Yeast Sps1/Ste20-related kinase 4 (S. cerevisiae)	0.919091	0.129655	0.244683
Plate1	G21	NM_153335	LYK5	LYK5	0.853625	0.221815	0.30443
Plate1	G22	NM_030662	MAP2K2	mitogen-activated protein kinase kinase 2	0.885338	0.184944	0.281469
Plate1	H01	NM_001261	CDK9	cyclin-dependent kinase 9 (CDC2-related kinase)	0.996707	0.490524	0.493744
Plate1	H02	NM_003159	CDKL5	cyclin-dependent kinase-like 5	0.82909	0.0350447	0.15232
Plate1	H03	NM_001291	CLK2	CDC-like kinase 2	0.87004	0.117746	0.236005
Plate1	H04	NM_020666	CLK4	CDC-like kinase 4	0.886236	0.240025	0.316214
Plate1	H05	NM_001396	DYRK1A	dual-specificity tyrosine-(Y)-phosphorylation regulated kinase 1A	0.684899	0.0172747	0.118603
Plate1	H06	NM_003583	DYRK2	dual-specificity tyrosine-(Y)-phosphorylation regulated kinase 2	0.738831	0.103572	0.224115
Plate1	H07	NM_003845	DYRK4	dual-specificity tyrosine-(Y)-phosphorylation regulated kinase 4	0.881316	0.213568	0.299441
Plate1	H08	NM_002093	GSK3B	glycogen synthase kinase 3 beta	0.866126	0.194372	0.286651
Plate1	H09	NM_005734	HIPK3	homeodomain interacting protein kinase 3	0.945705	0.259953	0.329493
Plate1	H10	NM_173041	ICK	intestinal cell (MAK-like) kinase	0.896409	0.0637548	0.186008
Plate1	H11	NM_002751	MAPK11	mitogen-activated protein kinase 11	1.0283	0.269316	0.335203
Plate1	H12	NM_002754	MAPK13	mitogen-activated protein kinase 13	0.597218	0.00294063	0.0780399
Plate1	H13	NM_002750	MAPK8	mitogen-activated protein kinase 8	0.878014	0.219757	0.303416
Plate1	H14	NM_016231	NLK	nemo like kinase	0.916075	0.283231	0.3449
Plate1	H15	NM_002595	PCTK2	PCTAIRE protein kinase 2	0.822868	0.139551	0.251986
Plate1	H16	NM_176800	PRPF4B	PRP4 pre-mRNA processing factor 4 homolog B (yeast)	0.882073	0.303903	0.35891
Plate1	H17	NM_002407	SCGB2A1	secretoglobin, family 2A, member 1	0.89994	0.280438	0.34309
Plate1	H18	NM_003138	SRPK2	SFRS protein kinase 2	0.896371	0.261675	0.330008
Plate1	H19	NM_018571	ALS2CR2	amyotrophic lateral sclerosis 2 (juvenile) chromosome region, candidate 2	1.00251	0.488658	0.492315
Plate1	H20	NM_016281	JIK	TAO kinase 3	0.908841	0.114711	0.233654
Plate1	H21	NM_002755	MAP2K1	mitogen-activated protein kinase kinase 1	0.877553	0.09545	0.216914
Plate1	H22	NM_145185	MAP2K7	mitogen-activated protein kinase kinase 7	0.922138	0.318101	0.367577
Plate1	I01	NM_006609	MAP3K2	mitogen-activated protein kinase kinase kinase 2	0.910136	0.236473	0.313781
Plate1	I02	NM_005923	MAP3K5	mitogen-activated protein kinase kinase kinase 5	0.789936	0.207331	0.295347
Plate1	I03	NM_145687	MAP4K4	mitogen-activated protein kinase kinase kinase kinase 4	0.794912	0.00748123	0.0953727
Plate1	I04	NM_016542	MST4	MST4	0.743591	0.0498053	0.170761
Plate1	I05	NM_138995	MYO3B	myosin IIIB	0.909337	0.0928016	0.213533
Plate1	I06	NM_002576	PAK1	p21/Cdc42/Rac1-activated kinase 1 (STE20 homolog, yeast)	0.89721	0.0983272	0.219477
Plate1	I07	NM_001014832	PAK4	p21(CDKN1A)-activated kinase 4	0.9483	0.236374	0.3138
Plate1	I08	NM_020341	PAK7	p21(CDKN1A)-activated kinase 7	0.893855	0.122709	0.239602
Plate1	I09	NM_005990	STK10	serine/threonine kinase 10	0.841747	0.204819	0.293892
Plate1	I10	NM_006374	STK25	serine/threonine kinase 25 (STE20 homolog, yeast)	0.80585	0.131193	0.246405
Plate1	I11	NM_013233	STK39	serine threonine kinase 39 (STE20/SPS1 homolog, yeast)	0.916353	0.146562	0.257159
Plate1	I12	NM_005157	ABL1	v-abl Abelson murine leukemia viral oncogene homolog 1	0.824362	0.0925941	0.213857
Plate1	I13	NM_001010938	ACK1	tyrosine kinase, non-receptor, 2	0.564917	0.13748	0.250789
Plate1	I14	NM_021913	AXL	AXL receptor tyrosine kinase	0.962161	0.34027	0.383012
Plate1	I15	NM_001721	BMX	BMX non-receptor tyrosine kinase	0.865531	0.0544543	0.174964
Plate1	I16	NM_004383	CSK	c-src tyrosine kinase	1.01629	0.410521	0.435114
Plate1	I17	NM_006182	DDR2	discoidin domain receptor family, member 2	0.666943	0.022541	0.130975
Plate1	I18	NM_005232	EPHA1	EPH receptor A1	0.872584	0.220984	0.303743
Plate1	I19	NM_182644	EPHA3	EPH receptor A3	0.681468	0.0420049	0.160796
Plate1	I20	NM_004439	EPHA5	EPH receptor A5	0.700002	0.00203593	0.0802737
Plate1	I21	NM_020526	EPHA8	EPH receptor A8	0.834505	0.0884479	0.209632
Plate1	I22	NM_017449	EPHB2	EPH receptor B2	0.89824	0.195851	0.287525
Plate1	J01	NM_203351	MAP3K3	mitogen-activated protein kinase kinase kinase 3	0.971938	0.38687	0.415795
Plate1	J02	NM_004579	MAP4K2	mitogen-activated protein kinase kinase kinase kinase 2	0.929156	0.231567	0.310783
Plate1	J03	NM_015716	MINK	misshapen-like kinase 1 (zebrafish)	0.937192	0.325388	0.372876
Plate1	J04	NM_017433	MYO3A	myosin IIIA	0.933279	0.0985029	0.219425
Plate1	J05	NM_005109	OSR1	oxidative-stress responsive 1	0.878182	0.220782	0.303617
Plate1	J06	NM_002578	PAK3	p21 (CDKN1A)-activated kinase 3	0.86757	0.0970805	0.218639
Plate1	J07	NM_020168	PAK6	p21(CDKN1A)-activated kinase 6	0.958952	0.428101	0.447052
Plate1	J08	NM_014720	SLK	STE20-like kinase (yeast)	0.938397	0.14735	0.257559
Plate1	J09	NM_003576	STK24	serine/threonine kinase 24 (STE20 homolog, yeast)	0.935583	0.0669205	0.189146
Plate1	J10	NM_006281	STK3	serine/threonine kinase 3 (STE20 homolog, yeast)	0.81758	0.064895	0.186573
Plate1	J11	NM_006282	STK4	serine/threonine kinase 4	0.807235	0.12056	0.23742
Plate1	J12	NM_005158	ABL2	v-abl Abelson murine leukemia viral oncogene homolog 2 (arg, Abelson-related gene)	0.885367	0.153946	0.261551
Plate1	J13	NM_004304	ALK	anaplastic lymphoma kinase (Ki-1)	0.888828	0.125636	0.241726
Plate1	J14	NM_001715	BLK	B lymphoid tyrosine kinase	0.847354	0.224144	0.306181
Plate1	J15	NM_000061	BTK	Bruton agammaglobulinemia tyrosine kinase	0.854085	0.22318	0.305468
Plate1	J16	NM_013994	DDR1	discoidin domain receptor family, member 1	0.700232	0.117783	0.235993
Plate1	J17	NM_201284	EGFR	epidermal growth factor receptor (erythroblastic leukemia viral (v-erb-b) oncogene homolog, avian)	0.937737	0.199893	0.290065
Plate1	J18	NM_004431	EPHA2	EPH receptor A2	0.814476	0.0308679	0.147016
Plate1	J19	NM_004438	EPHA4	EPH receptor A4	0.880851	0.206233	0.294695
Plate1	J20	NM_004440	EPHA7	EPH receptor A7	0.749419	0.0508749	0.171342
Plate1	J21	NM_004441	EPHB1	EPH receptor B1	0.666856	0.0252007	0.136113
Plate1	J22	NM_004443	EPHB3	EPH receptor B3	0.589678	0.0187482	0.121897
Plate1	K01	NM_004444	EPHB4	EPH receptor B4	0.829243	0.256292	0.327788
Plate1	K02	NM_001982	ERBB3	v-erb-b2 erythroblastic leukemia viral oncogene homolog 3 (avian)	0.805208	0.203063	0.292207
Plate1	K03	NM_005246	FER	fer (fps/fes related) tyrosine kinase (phosphoprotein NCP94)	0.940663	0.3345	0.379457
Plate1	K04	NM_000142	FGFR3	fibroblast growth factor receptor 3 (achondroplasia, thanatophoric dwarfism)	0.876179	0.171895	0.274
Plate1	K05	NM_005248	FGR	Gardner-Rasheed feline sarcoma viral (v-fgr) oncogene homolog	0.823232	0.0701205	0.192474
Plate1	K06	NM_004119	FLT3	fms-related tyrosine kinase 3	0.802455	0.0293222	0.144002
Plate1	K07	NM_002031	FRK	fyn-related kinase	0.969893	0.315963	0.366334
Plate1	K08	NM_002110	HCK	hemopoietic cell kinase	0.860886	0.138513	0.251345
Plate1	K09	NM_005546	ITK	IL2-inducible T-cell kinase	0.84101	0.0629835	0.185522
Plate1	K10	NM_004972	JAK2	Janus kinase 2 (a protein tyrosine kinase)	0.84244	0.178137	0.277929
Plate1	K11	NM_002253	KDR	kinase insert domain receptor (a type III receptor tyrosine kinase)	0.745105	0.024878	0.135564
Plate1	K12	NM_014916	LMTK2	lemur tyrosine kinase 2	0.836178	0.110598	0.230378
Plate1	K13	NM_002350	LYN	v-yes-1 Yamaguchi sarcoma viral related oncogene homolog	0.872263	0.15144	0.260176
Plate1	K14	NM_006343	MERTK	c-mer proto-oncogene tyrosine kinase	0.713293	0.00745537	0.095484
Plate1	K15	NM_005592	MUSK	muscle, skeletal, receptor tyrosine kinase	0.769593	0.021672	0.129189
Plate1	K16	NM_001007097	NTRK2	neurotrophic tyrosine kinase, receptor, type 2	0.908645	0.163945	0.268619
Plate1	K17	NM_006206	PDGFRA	platelet-derived growth factor receptor, alpha polypeptide	0.935221	0.155162	0.262407
Plate1	K18	NM_173174	PTK2B	PTK2B protein tyrosine kinase 2 beta	0.874533	0.160767	0.266657
Plate1	K19	NM_020975	RET	ret proto-oncogene (multiple endocrine neoplasia and medullary thyroid carcinoma 1, Hirschsprung disease)	0.810929	0.0567784	0.178891
Plate1	K20	NM_004560	ROR2	receptor tyrosine kinase-like orphan receptor 2	0.870307	0.0206934	0.127061
Plate1	K21	NM_002958	RYK	RYK receptor-like tyrosine kinase	0.704121	0.000548107	0.0737939
Plate1	K22	NM_080823	SRMS	src-related kinase lacking C-terminal regulatory tyrosine and N-terminal myristylation sites	0.781881	0.0156724	0.113533
Plate1	L01	NM_004445	EPHB6	EPH receptor B6	0.913525	0.256704	0.328011
Plate1	L02	NM_005235	ERBB4	v-erb-a erythroblastic leukemia viral oncogene homolog 4 (avian)	0.849765	0.0969744	0.218489
Plate1	L03	NM_002005	FES	feline sarcoma oncogene	0.743376	0.0191294	0.12307
Plate1	L04	NM_022963	FGFR4	fibroblast growth factor receptor 4	0.877847	0.231751	0.310728
Plate1	L05	NM_002019	FLT1	fms-related tyrosine kinase 1 (vascular endothelial growth factor/vascular permeability factor receptor)	0.837763	0.138982	0.251371
Plate1	L06	NM_182925	FLT4	fms-related tyrosine kinase 4	0.890911	0.196306	0.287964
Plate1	L07	NM_153047	FYN	FYN oncogene related to SRC, FGR, YES	0.756754	0.0608443	0.183832
Plate1	L08	NM_000208	INSR	insulin receptor	0.953582	0.211434	0.298342
Plate1	L09	NM_002227	JAK1	Janus kinase 1 (a protein tyrosine kinase)	1.03356	0.411099	0.435476
Plate1	L10	NM_000215	JAK3	Janus kinase 3 (a protein tyrosine kinase, leukocyte)	0.863562	0.0726271	0.194991
Plate1	L11	NM_000222	KIT	v-kit Hardy-Zuckerman 4 feline sarcoma viral oncogene homolog	0.708649	0.0106752	0.103745
Plate1	L12	NM_206961	LTK	leukocyte tyrosine kinase	0.927765	0.139544	0.252139
Plate1	L13	NM_139355	MATK	megakaryocyte-associated tyrosine kinase	0.777464	0.0370299	0.154618
Plate1	L14	NM_002447	MST1R	macrophage stimulating 1 receptor (c-met-related tyrosine kinase)	0.970732	0.418869	0.440915
Plate1	L15	NM_002529	NTRK1	neurotrophic tyrosine kinase, receptor, type 1	0.651678	0.0449509	0.16476
Plate1	L16	NM_002530	NTRK3	neurotrophic tyrosine kinase, receptor, type 3	0.773989	0.00833643	0.0970825
Plate1	L17	NM_002609	PDGFRB	platelet-derived growth factor receptor, beta polypeptide	0.882906	0.015031	0.112427
Plate1	L18	NM_005975	PTK6	PTK6 protein tyrosine kinase 6	0.720384	0.001985	0.0823849
Plate1	L19	NM_005012	ROR1	receptor tyrosine kinase-like orphan receptor 1	0.790492	0.0156815	0.113449
Plate1	L20	NM_002944	ROS1	v-ros UR2 sarcoma virus oncogene homolog 1 (avian)	0.811474	0.0879889	0.209624
Plate1	L21	NM_198291	SRC	v-src sarcoma (Schmidt-Ruppin A-2) viral oncogene homolog (avian)	0.609289	0.0993254	0.220103
Plate1	L22	NM_018423	STYK1	serine/threonine/tyrosine kinase 1	0.982787	0.419234	0.441047
Plate1	M01	NM_003177	SYK	spleen tyrosine kinase	0.797233	0.222348	0.304707
Plate1	M02	NM_000459	TEK	TEK tyrosine kinase, endothelial (venous malformations, multiple cutaneous and mucosal)	1.00395	0.493515	0.49522
Plate1	M03	NM_003985	TNK1	tyrosine kinase, non-receptor, 1	1.01577	0.451717	0.463903
Plate1	M04	NM_003331	TYK2	tyrosine kinase 2	0.723722	0.0196795	0.124291
Plate1	M05	NM_001079	ZAP70	zeta-chain (TCR) associated protein kinase 70kDa	0.863831	0.107118	0.228122
Plate1	M06	NM_020327	ACVR1B	activin A receptor, type IB	0.757455	0.00983099	0.101244
Plate1	M07	NM_001616	ACVR2	activin A receptor, type II	0.937325	0.334565	0.379454
Plate1	M08	NM_000020	ACVRL1	activin A receptor type II-like 1	0.935677	0.18681	0.281516
Plate1	M09	NM_178510	ANKK1	ankyrin repeat and kinase domain containing 1	0.81299	0.113544	0.232998
Plate1	M10	NM_004329	BMPR1A	bone morphogenetic protein receptor, type IA	0.807632	0.130443	0.245414
Plate1	M11	NM_033346	BMPR2	bone morphogenetic protein receptor, type II (serine/threonine kinase)	0.968544	0.367163	0.403251
Plate1	M12	NM_001014795	ILK	integrin-linked kinase	0.947671	0.224689	0.306469
Plate1	M13	NM_007199	IRAK3	interleukin-1 receptor-associated kinase 3	0.960881	0.386595	0.415662
Plate1	M14	NM_173598	KSR2	kinase suppressor of ras 2	0.865333	0.0999653	0.220723
Plate1	M15	NM_024652	LRRK1	leucine-rich repeat kinase 1	0.746778	0.00679356	0.0923656
Plate1	M16	NM_002419	MAP3K11	mitogen-activated protein kinase kinase kinase 11	0.938832	0.18941	0.283115
Plate1	M17	NM_004721	MAP3K13	mitogen-activated protein kinase kinase kinase 13	0.834564	0.171456	0.273933
Plate1	M18	NM_004225	MFHAS1	malignant fibrous histiocytoma amplified sequence 1	0.875796	0.0413322	0.160333
Plate1	M19	NM_003821	RIPK2	receptor-interacting serine-threonine kinase 2	0.835132	0.146797	0.257326
Plate1	M20	NM_020639	RIPK4	receptor-interacting serine-threonine kinase 4	0.840544	0.0630523	0.185527
Plate1	M21	NM_007170	TESK2	testis-specific kinase 2	0.748584	0.014282	0.110415
Plate1	M22	NM_003242	TGFBR2	transforming growth factor, beta receptor II (70/80kDa)	0.794769	0.0708255	0.19316
Plate1	N01	NM_003215	TEC	tec protein tyrosine kinase	0.65535	0.0793693	0.202458
Plate1	N02	NM_005424	TIE	tyrosine kinase with immunoglobulin-like and EGF-like domains 1	0.777248	0.118501	0.23683
Plate1	N03	NM_003328	TXK	TXK tyrosine kinase	0.783775	0.175322	0.276745
Plate1	N04	NM_005433	YES1	v-yes-1 Yamaguchi sarcoma viral oncogene homolog 1	0.777654	0.0712828	0.193738
Plate1	N05	NM_001105	ACVR1	activin A receptor, type I	0.865363	0.118001	0.236087
Plate1	N06	NM_145259	ACVR1C	activin A receptor, type IC	0.719939	0.0554711	0.176586
Plate1	N07	NM_001106	ACVR2B	activin A receptor, type IIB	0.860699	0.188637	0.282649
Plate1	N08	NM_020547	AMHR2	anti-Mullerian hormone receptor, type II	0.736747	0.0621343	0.184696
Plate1	N09	NM_001654	ARAF1	v-raf murine sarcoma 3611 viral oncogene homolog	0.866336	0.33635	0.380696
Plate1	N10	NM_001203	BMPR1B	bone morphogenetic protein receptor, type IB	0.864229	0.0106019	0.103579
Plate1	N11	NM_152649	FLJ34389	mixed lineage kinase domain-like	0.984086	0.401289	0.427133
Plate1	N12	NM_001570	IRAK2	interleukin-1 receptor-associated kinase 2	0.776111	0.096118	0.217358
Plate1	N13	NM_032435	KIAA1804	KIAA1804	0.861069	0.0686524	0.191009
Plate1	N14	NM_002314	LIMK1	LIM domain kinase 1	0.703336	0.0836136	0.205589
Plate1	N15	NM_002446	MAP3K10	mitogen-activated protein kinase kinase kinase 10	0.917758	0.218924	0.302721
Plate1	N16	NM_006301	MAP3K12	mitogen-activated protein kinase kinase kinase 12	0.812833	0.162799	0.267774
Plate1	N17	NM_145333	MAP3K7	mitogen-activated protein kinase kinase kinase 7	0.841742	0.130047	0.245255
Plate1	N18	NM_002880	RAF1	v-raf-1 murine leukemia viral oncogene homolog 1	0.905934	0.234739	0.312381
Plate1	N19	NM_006871	RIPK3	receptor-interacting serine-threonine kinase 3	0.877058	0.162187	0.267646
Plate1	N20	NM_006285	TESK1	testis-specific kinase 1	0.944715	0.289746	0.349366
Plate1	N21	NM_004612	TGFBR1	transforming growth factor, beta receptor I (activin A receptor type II-like kinase, 53kDa)	0.974864	0.342416	0.384253
Plate1	N22	NM_015978	TNNI3K	TNNI3 interacting kinase	0.793784	0.00495676	0.0855041
Plate1	O01	NM_016653	ZAK	ZAK	0.780562	0.197009	0.288153
Plate1	O02	NM_052853	ADCK2	aarF domain containing kinase 2	0.635492	0.133121	0.247667
Plate1	O03	NM_174922	ADCK5	aarF domain containing kinase 5	0.706298	0.13822	0.25131
Plate1	O04	NM_005881	BCKDK	branched chain ketoacid dehydrogenase kinase	0.6348	0.175998	0.277019
Plate1	O05	NM_005104	BRD2	bromodomain containing 2	0.773079	0.218849	0.302693
Plate1	O06	NM_058243	BRD4	bromodomain containing 4	0.676351	0.352009	0.391752
Plate1	O07	NM_020247	CABC1	chaperone, ABC1 activity of bc1 complex like (S. pombe)	0.813012	0.131795	0.246781
Plate1	O08	NM_025096	FASTK	Fas-activated serine/threonine kinase	0.86695	0.31736	0.366952
Plate1	O09	NM_052947	HAK	alpha-kinase 2	0.832135	0.0626249	0.185158
Plate1	O10	NM_025144	LAK	alpha-kinase 1	0.870103	0.237168	0.314326
Plate1	O11	NM_002610	PDK1	pyruvate dehydrogenase kinase, isoenzyme 1	0.904747	0.34494	0.386221
Plate1	O12	NM_005391	PDK3	pyruvate dehydrogenase kinase, isoenzyme 3	0.918983	0.148338	0.257979
Plate1	O13	NM_006904	PRKDC	protein kinase, DNA-activated, catalytic polypeptide	0.836496	0.218242	0.302081
Plate1	O14	NM_007284	PTK9L	PTK9L protein tyrosine kinase 9-like (A6-related protein)	0.823021	0.123911	0.240503
Plate1	O15	NM_018343	RIOK2	RIO kinase 2 (yeast)	0.866864	0.287138	0.347511
Plate1	O16	NM_014006	SMG1	SMG1	0.960516	0.430452	0.448912
Plate1	O17	NM_138923	TAF1	TAF1 RNA polymerase II, TATA box binding protein (TBP)-associated factor, 250kDa	0.719124	0.184658	0.28119
Plate1	O18	NM_015905	TIF1	transcriptional intermediary factor 1	0.837257	0.265257	0.332098
Plate1	O19	NM_033020	TRIM33	tripartite motif-containing 33	0.89766	0.266636	0.33322
Plate1	O20	NM_003496	TRRAP	transformation/transcription domain-associated protein	0.722266	0.095841	0.217355
Plate1	O21	NM_080871	ASB10	ankyrin repeat and SOCS box-containing 10	0.702468	0.0612347	0.184205
Plate1	O22	NM_003160	AURKC	aurora kinase C	0.780336	0.184637	0.281235
Plate1	P01	NM_020421	ADCK1	aarF domain containing kinase 1	0.684301	0.172425	0.274527
Plate1	P02	NM_024876	ADCK4	aarF domain containing kinase 4	0.637731	0.146197	0.257009
Plate1	P03	NM_001184	ATR	ataxia telangiectasia and Rad3 related	0.561075	0.0363013	0.153433
Plate1	P04	NM_021574	BCR	breakpoint cluster region	0.776385	0.24225	0.317932
Plate1	P05	NM_007371	BRD3	bromodomain containing 3	0.485871	0.120397	0.237439
Plate1	P06	NM_001726	BRDT	bromodomain, testis-specific	0.751294	0.177447	0.278032
Plate1	P07	NM_013302	EEF2K	eukaryotic elongation factor-2 kinase	0.704078	0.111722	0.231236
Plate1	P08	NM_004958	FRAP1	FK506 binding protein 12-rapamycin associated protein 1	0.547548	0.105916	0.227227
Plate1	P09	NM_014365	HSPB8	heat shock 22kDa protein 8	0.765154	0.215415	0.300503
Plate1	P10	NM_020778	MIDORI	alpha-kinase 3	0.553645	0.0703502	0.192339
Plate1	P11	NM_002611	PDK2	pyruvate dehydrogenase kinase, isoenzyme 2	0.889235	0.0270165	0.13834
Plate1	P12	NM_002612	PDK4	pyruvate dehydrogenase kinase, isoenzyme 4	0.795171	0.132304	0.246979
Plate1	P13	NM_198974	PTK9	PTK9 protein tyrosine kinase 9	0.646261	0.00104101	0.0709427
Plate1	P14	NM_031480	RIOK1	RIO kinase 1 (yeast)	0.759745	0.073382	0.19578
Plate1	P15	NM_145906	RIOK3	RIO kinase 3 (yeast)	0.777872	0.0460248	0.165725
Plate1	P16	NM_032454	STK19	serine/threonine kinase 19	0.821103	0.0719774	0.194667
Plate1	P17	NM_153809	TAF1L	TAF1-like RNA polymerase II, TATA box binding protein (TBP)-associated factor, 210kDa	0.619587	0.0494498	0.169964
Plate1	P18	NM_005762	TRIM28	tripartite motif-containing 28	0.54506	0.028319	0.140956
Plate1	P19	NM_017672	TRPM7	transient receptor potential cation channel, subfamily M, member 7	0.724287	0.00293879	0.0783677
Plate1	P20	NM_014911	AAK1	AP2 associated kinase 1	0.640408	0.0452324	0.164916
Plate1	P21	NM_004217	AURKB	aurora kinase B	0.678182	0.0232251	0.13176
Plate1	P22	NM_198892	BMP2K	BMP2 inducible kinase	0.571295	0.0597237	0.182848
Plate10	A01	NM_012452	TNFRSF13B	tumor necrosis factor receptor superfamily, member 13B	0.694856	0.177857	0.277808
Plate10	A02	NM_001192	TNFRSF17	tumor necrosis factor receptor superfamily, member 17	0.683062	0.160307	0.266213
Plate10	A03	NM_148957	TNFRSF19	tumor necrosis factor receptor superfamily, member 19	0.720553	0.0439461	0.16424
Plate10	A04	NM_003327	TNFRSF4	tumor necrosis factor receptor superfamily, member 4	0.811682	0.00896634	0.0993859
Plate10	A05	NM_152873	TNFRSF6	Fas (TNF receptor superfamily, member 6)	0.548679	0.0906823	0.211835
Plate10	A06	NM_152942	TNFRSF8	tumor necrosis factor receptor superfamily, member 8	0.651438	0.0193805	0.12382
Plate10	A07	NM_016372	TPRA40	G protein-coupled receptor 175	0.788592	0.000141818	0.0559167
Plate10	A08	NM_018965	TREM2	triggering receptor expressed on myeloid cells 2	0.784579	0.216836	0.301115
Plate10	A09	NM_001018056	VLDLR	very low density lipoprotein receptor	0.811778	0.231965	0.310788
Plate10	A10	NM_007323	ZFYVE9	zinc finger, FYVE domain containing 9	0.893086	0.298261	0.355441
Plate10	A11	NM_001732	BTN1A1	butyrophilin, subfamily 1, member A1	0.644743	0.164962	0.269485
Plate10	A12	NM_181531	BTN2A2	butyrophilin, subfamily 2, member A2	0.742459	0.0852955	0.207415
Plate10	A13	NM_194441	BTN3A1	butyrophilin, subfamily 3, member A1	0.718155	0.0118861	0.106859
Plate10	A14	NM_197974	BTN3A3	butyrophilin, subfamily 3, member A3	0.815283	0.246065	0.320803
Plate10	A15	NM_020155	C11ORF4	C11ORF4	0.489952	0.0506427	0.171082
Plate10	A16	NM_001001391	CD44	CD44 antigen (homing function and Indian blood group system)	0.764183	0.214372	0.299881
Plate10	A17	NM_006725	CD6	CD6 antigen	0.909265	0.337773	0.381289
Plate10	A18	NM_173655	DKFZp434C1418	EPH receptor A6	0.689644	0.0880989	0.209615
Plate10	A19	NM_004406	DMBT1	deleted in malignant brain tumors 1	0.813692	0.299601	0.356038
Plate10	A20	NM_173641	FLJ33655	EPH receptor A10	0.726194	0.186516	0.281457
Plate10	A21	NM_000820	GAS6	growth arrest-specific 6	0.801425	0.0730896	0.195567
Plate10	A22	NM_000211	ITGB2	integrin, beta 2 (antigen CD18 (p95), lymphocyte function-associated antigen 1; macrophage antigen 1 (mac-1) beta subunit)	0.802428	0.0277623	0.139952
Plate10	B01	NM_003820	TNFRSF14	tumor necrosis factor receptor superfamily, member 14 (herpesvirus entry mediator)	0.732927	0.00794272	0.0961487
Plate10	B02	NM_148901	TNFRSF18	tumor necrosis factor receptor superfamily, member 18	0.751568	0.0636225	0.18572
Plate10	B03	NM_148973	TNFRSF25	tumor necrosis factor receptor superfamily, member 25	0.708316	0.00286442	0.0786648
Plate10	B04	NM_152854	TNFRSF5	CD40 antigen (TNF receptor superfamily member 5)	0.798601	0.0810929	0.2031
Plate10	B05	NM_015647	TNFRSF6B	tumor necrosis factor receptor superfamily, member 6b, decoy	0.801453	0.0949937	0.21659
Plate10	B06	NM_001561	TNFRSF9	tumor necrosis factor receptor superfamily, member 9	0.67436	0.216485	0.300931
Plate10	B07	NM_018643	TREM1	triggering receptor expressed on myeloid cells 1	0.608053	0.112014	0.231234
Plate10	B08	NM_018949	UTS2R	urotensin 2 receptor	0.772388	0.122293	0.239212
Plate10	B09	NM_007235	XPOT	exportin, tRNA (nuclear export receptor for tRNAs)	0.858729	0.323799	0.372058
Plate10	B10	NM_201414	APP	amyloid beta (A4) precursor protein (protease nexin-II, Alzheimer disease)	0.731923	0.0112031	0.105893
Plate10	B11	NM_078476	BTN2A1	butyrophilin, subfamily 2, member A1	0.875949	0.321048	0.369745
Plate10	B12	NM_024018	BTN2A3	butyrophilin, subfamily 2, member A3	1.01619	0.410248	0.434909
Plate10	B13	NM_007047	BTN3A2	butyrophilin, subfamily 3, member A2	0.960853	0.302609	0.357918
Plate10	B14	NM_197975	BTNL3	butyrophilin-like 3	0.649617	0.0130022	0.108911
Plate10	B15	NM_004244	CD163	CD163 antigen	0.793303	0.18185	0.280003
Plate10	B16	NM_014207	CD5	CD5 antigen (p56-62)	0.828209	0.149463	0.258551
Plate10	B17	NM_130441	CLECSF7	C-type (calcium dependent, carbohydrate-recognition domain) lectin, superfamily member 7	0.791803	0.196828	0.288118
Plate10	B18	XM_290615	DKFZp762F0713	DKFZp762F0713	0.735489	0.00300332	0.0781996
Plate10	B19	NM_032030	FKSG83	FKSG83	0.822882	0.189099	0.283186
Plate10	B20	NM_198577	FLJ46361	FLJ46361	0.818151	0.151539	0.260105
Plate10	B21	NM_175924	ILDR1	immunoglobulin-like domain containing receptor 1	0.709048	0.00541028	0.0863143
Plate10	B22	NM_005567	LGALS3BP	lectin, galactoside-binding, soluble, 3 binding protein	0.728744	0.00283528	0.0798508
Plate10	C01	NM_002318	LOXL2	lysyl oxidase-like 2	0.819032	0.213316	0.299315
Plate10	C02	NM_032211	LOXL4	lysyl oxidase-like 4	0.87994	0.0968559	0.21849
Plate10	C03	NM_005373	MPL	myeloproliferative leukemia virus oncogene	0.636112	0.0293957	0.143851
Plate10	C04	NM_000271	NPC1	Niemann-Pick disease, type C1	0.729039	0.0584763	0.181037
Plate10	C05	NM_201264	NRP2	neuropilin 2	0.81045	0.0517711	0.172988
Plate10	C06	NM_052890	PGLYRP2	peptidoglycan recognition protein 2	0.850386	0.179631	0.279
Plate10	C07	NM_020393	PGLYRP4	peptidoglycan recognition protein 4	0.601163	0.0728515	0.195214
Plate10	C08	NM_003738	PTCH2	patched homolog 2 (Drosophila)	0.742806	0.154184	0.261796
Plate10	C09	NM_145214	TRIM11	tripartite motif-containing 11	0.679279	0.11253	0.231691
Plate10	C10	NM_003728	UNC5C	unc-5 homolog C (C. elegans)	0.689323	0.115275	0.234027
Plate10	C11	NM_000665	ACHE	acetylcholinesterase (YT blood group)	0.706233	0.0882227	0.209548
Plate10	C12	NM_020402	CHRNA10	cholinergic receptor, nicotinic, alpha polypeptide 10	0.781767	0.0644331	0.186606
Plate10	C13	NM_000747	CHRNB1	cholinergic receptor, nicotinic, beta polypeptide 1 (muscle)	0.856709	0.344949	0.386152
Plate10	C14	NM_000080	CHRNE	cholinergic receptor, nicotinic, epsilon polypeptide	0.692986	0.183947	0.280803
Plate10	C15	NM_020548	DBI	diazepam binding inhibitor (GABA receptor modulator, acyl-Coenzyme A binding protein)	0.780716	0.167256	0.270828
Plate10	C16	NM_000806	GABRA1	gamma-aminobutyric acid (GABA) A receptor, alpha 1	0.85841	0.280844	0.343358
Plate10	C17	NM_000808	GABRA3	gamma-aminobutyric acid (GABA) A receptor, alpha 3	0.766497	0.0157011	0.113443
Plate10	C18	NM_000810	GABRA5	gamma-aminobutyric acid (GABA) A receptor, alpha 5	0.757921	0.183965	0.280754
Plate10	C19	NM_021911	GABRB2	gamma-aminobutyric acid (GABA) A receptor, beta 2	0.618844	0.0926042	0.213791
Plate10	C20	NM_198904	GABRG2	gamma-aminobutyric acid (GABA) A receptor, gamma 2	0.840277	0.0902179	0.211466
Plate10	C21	NM_014211	GABRP	gamma-aminobutyric acid (GABA) A receptor, pi	0.821158	0.0537366	0.174383
Plate10	C22	NM_002042	GABRR1	gamma-aminobutyric acid (GABA) receptor, rho 1	0.815907	0.239663	0.316039
Plate10	D01	NM_032603	LOXL3	lysyl oxidase-like 3	0.683074	0.191027	0.283994
Plate10	D02	NM_002348	LY9	lymphocyte antigen 9	0.80295	0.0386868	0.157254
Plate10	D03	NM_002499	NEO1	neogenin homolog 1 (chicken)	0.719042	0.00124621	0.0681098
Plate10	D04	NM_003873	NRP1	neuropilin 1	0.79078	0.0633171	0.185417
Plate10	D05	NM_033135	PDGFD	platelet derived growth factor D	0.783284	0.0611235	0.184071
Plate10	D06	NM_052891	PGLYRP3	peptidoglycan recognition protein 3	0.744674	0.112897	0.232275
Plate10	D07	NM_000313	PROS1	protein S (alpha)	0.735044	0.00740748	0.095313
Plate10	D08	NM_003272	TM7SF1	transmembrane 7 superfamily member 1 (upregulated in kidney)	0.569465	0.0455148	0.165291
Plate10	D09	NM_054035	UNC119	unc-119 homolog (C. elegans)	0.752756	0.210235	0.297716
Plate10	D10	NM_003400	XPO1	exportin 1 (CRM1 homolog, yeast)	0.804302	0.158035	0.26443
Plate10	D11	NM_148911	CHRFAM7A	CHRNA7 (cholinergic receptor, nicotinic, alpha polypeptide 7, exons 5-10) and FAM7A (family with sequence similarity 7A, exons A-E) fusion	0.776922	0.0437443	0.164153
Plate10	D12	NM_017581	CHRNA9	cholinergic receptor, nicotinic, alpha polypeptide 9	0.766716	0.077692	0.200308
Plate10	D13	NM_000750	CHRNB4	cholinergic receptor, nicotinic, beta polypeptide 4	0.646725	0.0410758	0.160466
Plate10	D14	NM_005199	CHRNG	cholinergic receptor, nicotinic, gamma polypeptide	0.870606	0.305805	0.360154
Plate10	D15	NM_007285	GABARAPL2	GABA(A) receptor-associated protein-like 2	0.852046	0.095943	0.217318
Plate10	D16	NM_000807	GABRA2	gamma-aminobutyric acid (GABA) A receptor, alpha 2	0.796122	0.135169	0.249127
Plate10	D17	NM_000809	GABRA4	gamma-aminobutyric acid (GABA) A receptor, alpha 4	0.745497	0.0541186	0.174596
Plate10	D18	NM_000812	GABRB1	gamma-aminobutyric acid (GABA) A receptor, beta 1	0.806405	0.00384859	0.082024
Plate10	D19	NM_000814	GABRB3	gamma-aminobutyric acid (GABA) A receptor, beta 3	0.57576	0.0415214	0.160615
Plate10	D20	NM_033223	GABRG3	gamma-aminobutyric acid (GABA) A receptor, gamma 3	0.700916	0.00496235	0.0853339
Plate10	D21	NM_018558	GABRQ	gamma-aminobutyric acid (GABA) receptor, theta	0.794412	0.000550015	0.0722877
Plate10	D22	NM_002043	GABRR2	gamma-aminobutyric acid (GABA) receptor, rho 2	0.784256	0.065202	0.186581
Plate10	E01	NM_199173	BGLAP	bone gamma-carboxyglutamate (gla) protein (osteocalcin)	1.12846	0.261063	0.329613
Plate10	E02	NM_013445	GAD1	glutamate decarboxylase 1 (brain, 67kDa)	0.849233	0.264975	0.332196
Plate10	E03	NM_001498	GCLC	glutamate-cysteine ligase, catalytic subunit	0.730292	0.217542	0.301717
Plate10	E04	NM_005271	GLUD1	glutamate dehydrogenase 1	0.812325	0.0056515	0.0873845
Plate10	E05	NM_002065	GLUL	glutamate-ammonia ligase (glutamine synthase)	0.845979	0.310928	0.363397
Plate10	E06	XM_043613	GRID1	glutamate receptor, ionotropic, delta 1	0.801512	0.192832	0.285447
Plate10	E07	NM_175768	GRIK2	glutamate receptor, ionotropic, kainate 2	0.65064	0.178804	0.278656
Plate10	E08	NM_002088	GRIK5	glutamate receptor, ionotropic, kainate 5	0.83227	0.0694573	0.192086
Plate10	E09	NM_133445	GRIN3A	glutamate receptor, ionotropic, N-methyl-D-aspartate 3A	0.825129	0.00113676	0.0729641
Plate10	E10	NM_001018103	GRINL1A	glutamate receptor, ionotropic, N-methyl D-aspartate-like 1A	0.787665	0.133745	0.248076
Plate10	E11	NM_024698	SLC25A22	solute carrier family 25 (mitochondrial carrier: glutamate), member 22	0.823705	0.0104579	0.103641
Plate10	E12	NM_183393	CADPS	Ca2+-dependent secretion activator	0.675738	0.0175031	0.118987
Plate10	E13	NM_001493	GDI1	GDP dissociation inhibitor 1	0.75701	0.153463	0.261295
Plate10	E14	NM_006178	NSF	N-ethylmaleimide-sensitive factor	0.751339	0.00793111	0.096644
Plate10	E15	NM_002866	RAB3A	RAB3A, member RAS oncogene family	0.774757	0.00349204	0.080653
Plate10	E16	NM_138453	RAB3C	RAB3C, member RAS oncogene family	0.802528	0.0550875	0.176076
Plate10	E17	NM_004578	RAB4A	RAB4A, member RAS oncogene family	0.841566	0.212648	0.298833
Plate10	E18	NM_004853	STX8	syntaxin 8	0.760514	0.135692	0.249507
Plate10	E19	NM_004035	ACOX1	acyl-Coenzyme A oxidase 1, palmitoyl	0.802538	0.205531	0.294224
Plate10	E20	NM_003501	ACOX3	acyl-Coenzyme A oxidase 3, pristanoyl	0.812383	0.0853256	0.207214
Plate10	E21	NM_003734	AOC3	amine oxidase, copper containing 3 (vascular adhesion protein 1)	0.920252	0.394814	0.422196
Plate10	E22	NM_001303	COX10	COX10 homolog, cytochrome c oxidase assembly protein, heme A: farnesyltransferase (yeast)	0.844711	0.246798	0.321455
Plate10	F01	NM_001018078	FPGS	folylpolyglutamate synthase	0.775054	0.200833	0.290589
Plate10	F02	NM_000818	GAD2	glutamate decarboxylase 2 (pancreatic islets and brain, 65kDa)	0.739792	0.201765	0.291099
Plate10	F03	NM_002061	GCLM	glutamate-cysteine ligase, modifier subunit	0.783102	0.0271914	0.138721
Plate10	F04	NM_012084	GLUD2	glutamate dehydrogenase 2	0.776874	0.125716	0.241796
Plate10	F05	NM_016571	GLULD1	glutamate-ammonia ligase (glutamine synthase) domain containing 1	0.776733	0.0800002	0.202476
Plate10	F06	NM_001510	GRID2	glutamate receptor, ionotropic, delta 2	0.872206	0.247484	0.321969
Plate10	F07	NM_000831	GRIK3	glutamate receptor, ionotropic, kainate 3	0.677246	0.10017	0.220734
Plate10	F08	NM_000835	GRIN2C	glutamate receptor, ionotropic, N-methyl D-aspartate 2C	0.839606	0.16722	0.270928
Plate10	F09	NM_001009184	GRINA	glutamate receptor, ionotropic, N-methyl D-asparate-associated protein 1 (glutamate binding)	0.906047	0.00248361	0.0797065
Plate10	F10	NM_153006	NAGS	N-acetylglutamate synthase	0.782391	0.15478	0.262161
Plate10	F11	XM_371210	TAS1R3	taste receptor, type 1, member 3	0.836385	0.283106	0.3449
Plate10	F12	NM_000390	CHM	choroideremia (Rab escort protein 1)	0.826607	0.111654	0.231268
Plate10	F13	NM_001494	GDI2	GDP dissociation inhibitor 2	0.710283	0.109775	0.22953
Plate10	F14	NM_016322	RAB14	RAB14, member RAS oncogene family	0.684742	0.0360728	0.152936
Plate10	F15	NM_002867	RAB3B	RAB3B, member RAS oncogene family	0.831875	0.0945718	0.215807
Plate10	F16	NM_004283	RAB3D	RAB3D, member RAS oncogene family	0.80019	0.162237	0.267488
Plate10	F17	NM_016154	RAB4B	RAB4B, member RAS oncogene family	0.95964	0.424705	0.444853
Plate10	F18	NM_001091	ABP1	amiloride binding protein 1 (amine oxidase (copper-containing))	0.834695	0.017818	0.120092
Plate10	F19	NM_003500	ACOX2	acyl-Coenzyme A oxidase 2, branched chain	0.827251	0.00835012	0.0970372
Plate10	F20	NM_009590	AOC2	amine oxidase, copper containing 2 (retina-specific)	0.821746	0.206517	0.294872
Plate10	F21	NM_001159	AOX1	aldehyde oxidase 1	0.780378	0.0286538	0.141983
Plate10	F22	NM_001861	COX4I1	cytochrome c oxidase subunit IV isoform 1	0.815067	0.00480269	0.0860742
Plate10	G01	NM_032609	COX4I2	cytochrome c oxidase subunit IV isoform 2 (lung)	0.737453	0.0577598	0.179726
Plate10	G02	NM_001862	COX5B	cytochrome c oxidase subunit Vb	0.81812	0.00944586	0.100079
Plate10	G03	NM_005205	COX6A2	cytochrome c oxidase subunit VIa polypeptide 2	0.694058	0.00358487	0.0804409
Plate10	G04	NM_004374	COX6C	cytochrome c oxidase subunit VIc	0.724339	0.0128417	0.108555
Plate10	G05	NM_001865	COX7A2	cytochrome c oxidase subunit VIIa polypeptide 2 (liver)	0.674604	0.187991	0.282293
Plate10	G06	NM_001866	COX7B	cytochrome c oxidase subunit VIIb	0.565778	0.0222086	0.130278
Plate10	G07	NM_004074	COX8A	cytochrome c oxidase subunit 8A (ubiquitous)	0.877943	0.173407	0.275217
Plate10	G08	NM_000097	CPOX	coproporphyrinogen oxidase	0.859684	0.208334	0.296164
Plate10	G09	NM_004032	DDO	D-aspartate oxidase	0.731174	0.0058375	0.0875625
Plate10	G10	NM_014080	DUOX2	dual oxidase 2	0.777091	0.200232	0.290328
Plate10	G11	NM_201397	GPX1	glutathione peroxidase 1	0.787177	0.00856792	0.0977168
Plate10	G12	NM_002084	GPX3	glutathione peroxidase 3 (plasma)	0.699651	0.148794	0.258202
Plate10	G13	NM_003996	GPX5	glutathione peroxidase 5 (epididymal androgen-related protein)	0.840235	0.219663	0.303362
Plate10	G14	NM_000187	HGD	homogentisate 1,2-dioxygenase (homogentisate oxidase)	0.783593	0.211871	0.298577
Plate10	G15	NM_005576	LOXL1	lysyl oxidase-like 1	0.856428	0.272508	0.33735
Plate10	G16	NM_000240	MAOA	monoamine oxidase A	0.930354	0.321425	0.370101
Plate10	G17	NM_000250	MPO	myeloperoxidase	0.849282	0.20237	0.291819
Plate10	G18	NM_173705	MTCO2	cytochrome c oxidase II	0.903408	0.00304404	0.0770784
Plate10	G19	NM_015718	NOX3	NADPH oxidase 3	0.972414	0.439999	0.455769
Plate10	G20	NM_152911	PAOX	polyamine oxidase (exo-N4-amino)	0.750063	0.0725131	0.194969
Plate10	G21	NM_000309	PPOX	protoporphyrinogen oxidase	0.863011	0.211861	0.298639
Plate10	G22	NM_175842	SMOX	spermine oxidase	0.669748	0.0996868	0.22055
Plate10	H01	NM_004255	COX5A	cytochrome c oxidase subunit Va	0.813476	0.149163	0.258436
Plate10	H02	NM_004373	COX6A1	cytochrome c oxidase subunit VIa polypeptide 1	0.789123	0.0194267	0.123828
Plate10	H03	NM_001863	COX6B1	cytochrome c oxidase subunit Vib polypeptide 1 (ubiquitous)	0.797677	0.0337744	0.150959
Plate10	H04	NM_001864	COX7A1	cytochrome c oxidase subunit VIIa polypeptide 1 (muscle)	0.761609	0.0354862	0.153274
Plate10	H05	NM_183003	COX7A3	cytochrome c oxidase subunit VIIa pseudogene 2	0.7667	0.159504	0.265279
Plate10	H06	NM_001867	COX7C	cytochrome c oxidase subunit VIIc	0.851129	0.175318	0.276818
Plate10	H07	NM_000096	CP	ceruloplasmin (ferroxidase)	0.820189	0.0268831	0.13817
Plate10	H08	NM_001917	DAO	D-amino-acid oxidase	0.867734	0.0254428	0.136486
Plate10	H09	NM_017434	DUOX1	dual oxidase 1	0.762597	0.114316	0.23328
Plate10	H10	NM_000502	EPX	eosinophil peroxidase	0.777521	0.0907132	0.211728
Plate10	H11	NM_002083	GPX2	glutathione peroxidase 2 (gastrointestinal)	0.992386	0.491959	0.494287
Plate10	H12	NM_002085	GPX4	glutathione peroxidase 4 (phospholipid hydroperoxidase)	0.561074	0.321753	0.370247
Plate10	H13	NM_015696	GPX7	glutathione peroxidase 7	0.763344	0.0491027	0.16951
Plate10	H14	NM_002317	LOX	lysyl oxidase	0.677986	0.00570223	0.0879227
Plate10	H15	NM_006151	LPO	lactoperoxidase	0.825654	0.277635	0.341172
Plate10	H16	NM_000898	MAOB	monoamine oxidase B	0.865426	0.0475411	0.167257
Plate10	H17	NM_173704	MTCO1	cytochrome c oxidase I	0.749036	0.0145148	0.110971
Plate10	H18	NM_013954	NOX1	NADPH oxidase 1	0.782987	0.000865229	0.0663342
Plate10	H19	NM_024505	NOX5	NADPH oxidase, EF hand calcium-binding domain 5	0.782693	0.00301607	0.0777976
Plate10	H20	NM_018129	PNPO	pyridoxine 5-phosphate oxidase	0.797375	0.00241199	0.0802058
Plate10	H21	NM_006745	SC4MOL	sterol-C4-methyl oxidase-like	0.739759	0.201418	0.290826
Plate10	H22	NM_003129	SQLE	squalene epoxidase	0.663545	0.00597083	0.0878907
Plate10	I01	NM_000456	SUOX	sulfite oxidase	0.795519	0.198308	0.28921
Plate10	I02	NM_018308	ACOXL	acyl-Coenzyme A oxidase-like	0.983584	0.476736	0.483214
Plate10	I03	NM_004109	FDX1	ferredoxin 1	0.905331	0.340578	0.383124
Plate10	I04	NM_002028	FNTB	farnesyltransferase, CAAX box, beta	0.927842	0.428997	0.447904
Plate10	I05	NM_002340	LSS	lanosterol synthase (2,3-oxidosqualene-lanosterol cyclase)	0.702228	0.0836314	0.205541
Plate10	I06	NM_181697	PRDX1	peroxiredoxin 1	0.7575	0.128422	0.243521
Plate10	I07	NM_006406	PRDX4	peroxiredoxin 4	0.939708	0.371533	0.40587
Plate10	I08	NM_000963	PTGS2	prostaglandin-endoperoxide synthase 2 (prostaglandin G/H synthase and cyclooxygenase)	0.81218	0.0415831	0.160629
Plate10	I09	NM_006918	SC5DL	sterol-C5-desaturase (ERG3 delta-5-desaturase homolog, fungal)-like	0.764989	0.0912116	0.212263
Plate10	I10	NM_201252	AFAR3	AFAR3	0.845242	0.206682	0.294955
Plate10	I11	NM_020299	AKR1B10	aldo-keto reductase family 1, member B10 (aldose reductase)	0.662864	0.0442284	0.164073
Plate10	I12	NM_003689	AKR7A2	aldo-keto reductase family 7, member A2 (aflatoxin aldehyde reductase)	0.819897	0.0218236	0.129534
Plate10	I13	NM_017584	ALDRL6	aldehyde reductase (aldose reductase) like 6	0.837697	0.225752	0.307237
Plate10	I14	NM_000713	BLVRB	biliverdin reductase B (flavin reductase (NADPH))	0.841945	0.280573	0.343179
Plate10	I15	NM_001236	CBR3	carbonyl reductase 3	0.904804	0.232739	0.311296
Plate10	I16	NM_022802	CTBP2	C-terminal binding protein 2	0.766791	0.0545317	0.17511
Plate10	I17	NM_024843	CYBRD1	cytochrome b reductase 1	0.86108	0.262549	0.330658
Plate10	I18	NM_014762	DHCR24	24-dehydrocholesterol reductase	0.795467	0.00686532	0.0924307
Plate10	I19	NM_000791	DHFR	dihydrofolate reductase	0.767121	0.155912	0.263111
Plate10	I20	NM_022051	EGLN1	egl nine homolog 1 (C. elegans)	0.701869	0.139442	0.252037
Plate10	I21	NM_022073	EGLN3	egl nine homolog 3 (C. elegans)	0.841599	0.00776797	0.0957124
Plate10	I22	NM_020944	GBA2	glucosidase, beta (bile acid) 2	0.821094	0.125267	0.241267
Plate10	J01	NM_175721	TPO	thyroid peroxidase	0.72377	0.16961	0.272561
Plate10	J02	NM_001009999	AOF2	amine oxidase (flavin containing) domain 2	0.739114	0.0525614	0.173217
Plate10	J03	NM_144651	FLJ25471	FLJ25471	0.817396	0.00858652	0.0975259
Plate10	J04	NM_172374	IL4I1	interleukin 4 induced 1	0.815725	0.0631525	0.185427
Plate10	J05	NM_005023	PGGT1B	protein geranylgeranyltransferase type I, beta subunit	0.728875	0.264337	0.331774
Plate10	J06	NM_181737	PRDX2	peroxiredoxin 2	0.85426	0.00980749	0.101191
Plate10	J07	NM_000962	PTGS1	prostaglandin-endoperoxide synthase 1 (prostaglandin G/H synthase and cyclooxygenase)	0.782351	0.00203087	0.0806503
Plate10	J08	NM_004582	RABGGTB	Rab geranylgeranyltransferase, beta subunit	0.782617	0.0160613	0.114694
Plate10	J09	NM_000372	TYR	tyrosinase (oculocutaneous albinism IA)	0.819782	0.00704657	0.0939543
Plate10	J10	NM_001628	AKR1B1	aldo-keto reductase family 1, member B1 (aldose reductase)	0.9369	0.421364	0.442444
Plate10	J11	NM_031436	AKR1CL2	aldo-keto reductase family 1, member C-like 2	0.823138	0.32511	0.372712
Plate10	J12	NM_012067	AKR7A3	aldo-keto reductase family 7, member A3 (aflatoxin aldehyde reductase)	0.854257	0.045075	0.164996
Plate10	J13	NM_000712	BLVRA	biliverdin reductase A	0.785138	0.00386145	0.0819815
Plate10	J14	NM_001757	CBR1	carbonyl reductase 1	0.819848	0.117217	0.235802
Plate10	J15	NM_001328	CTBP1	C-terminal binding protein 1	0.941863	0.276891	0.340712
Plate10	J16	NM_016229	CYB5R2	CYB5R2	0.780918	0.239039	0.315668
Plate10	J17	NM_144780	DEGS	degenerative spermatocyte homolog 1, lipid desaturase (Drosophila)	0.742232	0.0128402	0.108708
Plate10	J18	NM_001360	DHCR7	7-dehydrocholesterol reductase	0.856637	0.132188	0.247097
Plate10	J19	NM_007326	DIA1	diaphorase (NADH) (cytochrome b-5 reductase)	0.885402	0.184373	0.280989
Plate10	J20	NM_053046	EGLN2	egl nine homolog 2 (C. elegans)	0.707663	0.0906918	0.211768
Plate10	J21	NM_024417	FDXR	ferredoxin reductase	0.766925	0.256454	0.327843
Plate10	J22	NM_018988	GFOD1	glucose-fructose oxidoreductase domain containing 1	0.687327	0.000679177	0.069427
Plate10	K01	NM_000637	GSR	glutathione reductase	0.825164	0.149217	0.258368
Plate10	K02	NM_013387	HSPC051	HSPC051	0.867938	0.379935	0.411466
Plate10	K03	NM_018192	LEPREL1	leprecan-like 1	0.88055	0.191794	0.284751
Plate10	K04	NM_205835	LISCH7	LISCH7	0.850457	0.257222	0.328141
Plate10	K05	XM_116623	LOC202789	LOC202789	0.837408	0.112225	0.231495
Plate10	K06	XM_292664	LOC342659	LOC342659	0.689435	0.0716355	0.194313
Plate10	K07	NM_014632	MICAL2	microtubule associated monoxygenase, calponin and LIM domain containing 2	0.839972	0.0344602	0.15157
Plate10	K08	NM_012331	MSRA	methionine sulfoxide reductase A	0.892363	0.242896	0.318099
Plate10	K09	NM_002454	MTRR	5-methyltetrahydrofolate-homocysteine methyltransferase reductase	0.816281	0.0312559	0.148097
Plate10	K10	NM_014434	NDOR1	NADPH dependent diflavin oxidoreductase 1	0.947801	0.417555	0.439951
Plate10	K11	NM_016243	NQO3A2	NAD(P)H:quinone oxidoreductase type 3, polypeptide A2	0.673332	0.189341	0.283242
Plate10	K12	NM_020889	PHF12	PHD finger protein 12	0.882746	0.00465364	0.0864919
Plate10	K13	NM_014098	PRDX3	peroxiredoxin 3	0.901308	0.419655	0.441321
Plate10	K14	NM_013328	PYCR2	pyrroline-5-carboxylate reductase family, member 2	0.898611	0.300774	0.356971
Plate10	K15	NM_001034	RRM2	ribonucleotide reductase M2 polypeptide	0.651066	0.0416831	0.160678
Plate10	K16	NM_031454	SELO	SELO	0.839002	0.0944391	0.215593
Plate10	K17	NM_021199	SQRDL	sulfide quinone reductase-like (yeast)	0.774547	0.00318016	0.0787198
Plate10	K18	NM_145747	TXNRD2	thioredoxin reductase 2	0.709776	0.0243003	0.134272
Plate10	K19	NM_006294	UQCRB	ubiquinol-cytochrome c reductase binding protein	0.871263	0.00273215	0.079796
Plate10	K20	NM_006004	UQCRH	ubiquinol-cytochrome c reductase hinge protein	0.808615	0.0241759	0.134256
Plate10	K21	NM_025059	C6orf97	chromosome 6 open reading frame 97	0.761864	0.0356551	0.152808
Plate10	K22	NM_024955	FLJ23322	FLJ23322	0.890907	0.383399	0.413594
Plate10	L01	NM_000859	HMGCR	3-hydroxy-3-methylglutaryl-Coenzyme A reductase	0.643779	0.110962	0.230441
Plate10	L02	NM_015229	KIAA0664	KIAA0664	0.903615	0.323996	0.372131
Plate10	L03	NM_014262	LEPREL2	leprecan-like 2	0.841921	0.205349	0.294041
Plate10	L04	XM_092681	LOC151575	LOC151575	0.825307	0.0416893	0.16059
Plate10	L05	NM_178128	LOC283985	fatty acid desaturase domain family, member 6	0.820391	0.00978114	0.101489
Plate10	L06	NM_020142	LOC56901	LOC56901	0.709505	0.0283454	0.140834
Plate10	L07	XM_032997	MICAL3	microtubule associated monoxygenase, calponin and LIM domain containing 3	0.802231	0.0324475	0.148516
Plate10	L08	NM_005957	MTHFR	5,10-methylenetetrahydrofolate reductase (NADPH)	0.768333	0.00859752	0.0972506
Plate10	L09	NM_016230	NCB5OR	NADPH cytochrome B5 oxidoreductase	0.70865	0.176182	0.277073
Plate10	L10	NM_175614	NDUFA11	NADH dehydrogenase (ubiquinone) 1 alpha subcomplex, 11, 14.7kDa	0.759602	0.033083	0.149565
Plate10	L11	NM_033253	NT5C1B	5-nucleotidase, cytosolic IB	0.885227	0.000885746	0.0651909
Plate10	L12	NM_000941	POR	P450 (cytochrome) oxidoreductase	0.795667	0.0143618	0.110414
Plate10	L13	NM_153824	PYCR1	pyrroline-5-carboxylate reductase 1	0.749706	0.0701273	0.192397
Plate10	L14	NM_001033	RRM1	ribonucleotide reductase M1 polypeptide	0.929896	0.366638	0.402996
Plate10	L15	NM_015713	RRM2B	ribonucleotide reductase M2 B (TP53 inducible)	0.797728	0.177119	0.277833
Plate10	L16	NM_018836	SHREW1	SHREW1	0.831129	0.10685	0.228078
Plate10	L17	NM_182729	TXNRD1	thioredoxin reductase 1	0.931382	0.411571	0.435809
Plate10	L18	NM_006830	UQCR	ubiquinol cytochrome c reductase, 6.4kDa subunit	0.832665	0.27748	0.341057
Plate10	L19	NM_006003	UQCRFS1	ubiquinol-cytochrome c reductase, Rieske iron-sulfur polypeptide 1	0.741577	0.181149	0.279783
Plate10	L20	NM_032797	AMID	apoptosis-inducing factor (AIF)-like mitochondrion-associated inducer of death	0.703836	0.182796	0.280287
Plate10	L21	NM_024854	FLJ22028	FLJ22028	0.765208	0.0320279	0.147945
Plate10	L22	NM_002021	FMO1	flavin containing monooxygenase 1	0.602066	0.0229544	0.131032
Plate10	M01	NM_001460	FMO2	flavin containing monooxygenase 2	0.781316	0.201117	0.290619
Plate10	M02	NM_002022	FMO4	flavin containing monooxygenase 4	0.925636	0.342069	0.383941
Plate10	M03	NM_176815	LOC200895	dihydrofolate reductase-like 1	0.75654	0.0975339	0.218856
Plate10	M04	NM_133645	MTO1	mitochondrial translation optimization 1 homolog (S. cerevisiae)	0.752477	0.162601	0.267768
Plate10	M05	NM_000603	NOS3	nitric oxide synthase 3 (endothelial cell)	0.778506	0.132455	0.246928
Plate10	M06	NM_015913	TLP19	thioredoxin domain containing 12 (endoplasmic reticulum)	0.774954	0.035849	0.152926
Plate10	M07	NM_006541	TXNL2	thioredoxin-like 2	0.843915	0.0675607	0.190273
Plate10	M08	NM_003658	BARX2	BarH-like homeobox 2	0.675184	0.0591783	0.182087
Plate10	M09	NM_000063	C2	complement component 2	0.781136	0.0410517	0.160599
Plate10	M10	NM_000787	DBH	dopamine beta-hydroxylase (dopamine beta-monooxygenase)	0.791506	0.203682	0.292717
Plate10	M11	NM_032237	FLJ23356	FLJ23356	0.900978	0.134561	0.248587
Plate10	M12	NM_005269	GLI	glioma-associated oncogene homolog 1 (zinc finger protein)	0.832328	0.251547	0.324652
Plate10	M13	NM_003679	KMO	kynurenine 3-monooxygenase (kynurenine 3-hydroxylase)	0.83088	0.163781	0.268509
Plate10	M14	NM_020437	LOC57168	LOC57168	0.900737	0.406	0.431233
Plate10	M15	NM_198177	MITF	microphthalmia-associated transcription factor	0.838198	0.101538	0.221975
Plate10	M16	NM_001017962	P4HA1	procollagen-proline, 2-oxoglutarate 4-dioxygenase (proline 4-hydroxylase), alpha polypeptide I	0.806659	0.232485	0.311183
Plate10	M17	NM_182904	P4HA3	procollagen-proline, 2-oxoglutarate 4-dioxygenase (proline 4-hydroxylase), alpha polypeptide III	0.902095	0.368971	0.404031
Plate10	M18	NM_000277	PAH	phenylalanine hydroxylase	0.847098	0.169872	0.272586
Plate10	M19	NM_006214	PHYH	phytanoyl-CoA hydroxylase (Refsum disease)	0.992128	0.487725	0.491644
Plate10	M20	NM_000302	PLOD	procollagen-lysine 1, 2-oxoglutarate 5-dioxygenase 1	0.81385	0.00318866	0.0785776
Plate10	M21	NM_203466	PPIL5	peptidylprolyl isomerase (cyclophilin)-like 5	0.926166	0.374138	0.407908
Plate10	M22	NM_018196	TMLHE	trimethyllysine hydroxylase, epsilon	0.881639	0.16606	0.27
Plate10	N01	NM_006894	FMO3	flavin containing monooxygenase 3	0.590684	0.0300392	0.145071
Plate10	N02	NM_001461	FMO5	flavin containing monooxygenase 5	0.666405	0.00498147	0.0848696
Plate10	N03	NM_138381	MGC15763	MGC15763	0.941495	0.231413	0.310651
Plate10	N04	NM_000625	NOS2A	nitric oxide synthase 2A (inducible, hepatocytes)	0.856772	0.121011	0.237884
Plate10	N05	NM_004905	PRDX6	peroxiredoxin 6	0.753402	0.176362	0.277276
Plate10	N06	NM_003273	TM7SF2	transmembrane 7 superfamily member 2	0.772731	0.0362241	0.153341
Plate10	N07	NM_032468	ASPH	aspartate beta-hydroxylase	0.781115	0.00142774	0.0743504
Plate10	N08	NM_003986	BBOX1	butyrobetaine (gamma), 2-oxoglutarate dioxygenase (gamma-butyrobetaine hydroxylase) 1	0.622305	0.0239427	0.13404
Plate10	N09	NM_003956	CH25H	cholesterol 25-hydroxylase	0.925942	0.220197	0.303189
Plate10	N10	NM_024306	FA2H	fatty acid 2-hydroxylase	0.777115	0.138981	0.251451
Plate10	N11	NM_025211	GKAP1	G kinase anchoring protein 1	0.813594	0.119712	0.23719
Plate10	N12	NM_202758	HSRTSBETA	enolase superfamily member 1	0.877184	0.175202	0.276713
Plate10	N13	XM_208213	LOC284541	cytochrome P450, family 4, subfamily A, polypeptide 22	0.801216	0.203911	0.29297
Plate10	N14	NM_002748	MAPK6	mitogen-activated protein kinase 6	0.86127	0.381472	0.41224
Plate10	N15	NM_000433	NCF2	neutrophil cytosolic factor 2 (65kDa, chronic granulomatous disease, autosomal 2)	0.829176	0.00903344	0.0991344
Plate10	N16	NM_001017974	P4HA2	procollagen-proline, 2-oxoglutarate 4-dioxygenase (proline 4-hydroxylase), alpha polypeptide II	0.879176	0.309755	0.362717
Plate10	N17	NM_000918	P4HB	procollagen-proline, 2-oxoglutarate 4-dioxygenase (proline 4-hydroxylase), beta polypeptide (protein disulfide isomerase; thyroid hormone binding protein p55)	0.795922	0.00263974	0.0827918
Plate10	N18	NM_177939	PH-4	PH-4	0.87606	0.292391	0.351633
Plate10	N19	NM_014759	PHYHIP	phytanoyl-CoA hydroxylase interacting protein	0.857713	0.0889857	0.210094
Plate10	N20	NM_182943	PLOD2	procollagen-lysine, 2-oxoglutarate 5-dioxygenase 2	0.803671	0.217803	0.301852
Plate10	N21	NM_199292	TH	tyrosine hydroxylase	0.797939	0.20172	0.291186
Plate10	N22	NM_005802	TOPORS	topoisomerase I binding, arginine/serine-rich	0.978288	0.446685	0.460534
Plate10	O01	NM_004179	TPH1	tryptophan hydroxylase 1 (tryptophan 5-monooxygenase)	0.849964	0.312653	0.364486
Plate10	O02	NM_016487	C6orf203	chromosome 6 open reading frame 203	0.847739	0.337309	0.381077
Plate10	O03	NM_001985	ETFB	electron-transfer-flavoprotein, beta polypeptide	0.803342	0.0651588	0.186651
Plate10	O04	NM_016733	LIMK2	LIM domain kinase 2	0.768841	0.070865	0.192982
Plate10	O05	NM_015529	MOXD1	monooxygenase, DBH-like 1	0.79183	0.00308821	0.0778397
Plate10	O06	NM_001919	DCI	dodecenoyl-Coenzyme A delta isomerase (3,2 trans-enoyl-Coenzyme A isomerase)	0.833977	0.233463	0.311736
Plate10	O07	NM_006579	EBP	emopamil binding protein (sterol isomerase)	0.832023	0.102699	0.223893
Plate10	O08	NM_004911	ERP70	protein disulfide isomerase family A, member 4	0.827416	0.18136	0.279952
Plate10	O09	NM_145870	GSTZ1	glutathione transferase zeta 1 (maleylacetoacetate isomerase)	0.838864	0.223596	0.305734
Plate10	O10	NM_033261	IDI2	isopentenyl-diphosphate delta isomerase 2	0.774419	0.171516	0.273871
Plate10	O11	NM_022447	PAPD5	PAP associated domain containing 5	0.845344	0.258631	0.328647
Plate10	O12	NM_006810	PDIR	protein disulfide isomerase family A, member 5	0.825259	0.245188	0.319962
Plate10	O13	NM_006222	PIN1L	protein (peptidyl-prolyl cis/trans isomerase) NIMA-interacting 1-like	0.794215	0.0125543	0.108281
Plate10	O14	NM_021130	PPIA	peptidylprolyl isomerase A (cyclophilin A)	0.854749	0.369266	0.404274
Plate10	O15	NM_000943	PPIC	peptidylprolyl isomerase C (cyclophilin C)	0.755006	0.00215623	0.0798816
Plate10	O16	NM_203456	PPIE	peptidylprolyl isomerase E (cyclophilin E)	0.966883	0.451497	0.46385
Plate10	O17	NM_004792	PPIG	peptidyl-prolyl isomerase G (cyclophilin G)	0.834288	0.132474	0.24688
Plate10	O18	NM_016059	PPIL1	peptidylprolyl isomerase (cyclophilin)-like 1	0.819577	0.102727	0.223867
Plate10	O19	NM_131916	PPIL3	peptidylprolyl isomerase (cyclophilin)-like 3	0.775469	0.180944	0.279623
Plate10	O20	NM_173672	PPIL6	peptidylprolyl isomerase (cyclophilin)-like 6	0.795255	0.140101	0.252649
Plate10	O21	NM_003286	TOP1	topoisomerase (DNA) I	0.77231	0.0449932	0.164806
Plate10	O22	NM_001067	TOP2A	topoisomerase (DNA) II alpha 170kDa	1.04795	0.4168	0.439492
Plate10	P01	NM_173353	TPH2	tryptophan hydroxylase 2	0.5355	0.0315239	0.147593
Plate10	P02	NM_182476	COQ6	coenzyme Q6 homolog (yeast)	0.66038	0.0609207	0.183861
Plate10	P03	NM_017686	GDAP2	ganglioside induced differentiation associated protein 2	0.549408	0.0317187	0.147878
Plate10	P04	NM_177524	MEST	mesoderm specific transcript homolog (mouse)	0.645866	0.0428969	0.162297
Plate10	P05	NM_004556	NFKBIE	nuclear factor of kappa light polypeptide gene enhancer in B-cells inhibitor, epsilon	0.814336	0.101251	0.221877
Plate10	P06	NM_001922	DCT	dopachrome tautomerase (dopachrome delta-isomerase, tyrosine-related protein 2)	0.659694	0.0707031	0.193113
Plate10	P07	NM_032565	EBPL	emopamil binding protein-like	0.705893	0.00489281	0.0854693
Plate10	P08	NM_000175	GPI	glucose phosphate isomerase	0.71219	0.0476596	0.167142
Plate10	P09	NM_004508	IDI1	isopentenyl-diphosphate delta isomerase	0.705291	0.03317	0.149712
Plate10	P10	NM_002435	MPI	mannose phosphate isomerase	0.841433	0.0617116	0.184533
Plate10	P11	NM_006849	PDIP	protein disulfide isomerase, pancreatic	0.663978	0.0138641	0.110433
Plate10	P12	NM_006221	PIN1	protein (peptidyl-prolyl cis/trans isomerase) NIMA-interacting 1	0.712445	0.03737	0.154867
Plate10	P13	NM_006223	PIN4	protein (peptidyl-prolyl cis/trans isomerase) NIMA-interacting, 4 (parvulin)	0.786288	0.0177911	0.120204
Plate10	P14	NM_000942	PPIB	peptidylprolyl isomerase B (cyclophilin B)	0.835167	0.148278	0.258119
Plate10	P15	NM_005038	PPID	peptidylprolyl isomerase D (cyclophilin D)	0.778471	0.0333421	0.149999
Plate10	P16	NM_005729	PPIF	peptidylprolyl isomerase F (cyclophilin F)	0.844702	0.185191	0.281225
Plate10	P17	NM_006347	PPIH	peptidyl prolyl isomerase H (cyclophilin H)	0.858258	0.294491	0.353005
Plate10	P18	NM_148176	PPIL2	peptidylprolyl isomerase (cyclophilin)-like 2	0.796467	0.095511	0.216874
Plate10	P19	NM_139126	PPIL4	peptidylprolyl isomerase (cyclophilin)-like 4	0.984833	0.477866	0.484093
Plate10	P20	NM_144563	RPIA	ribose 5-phosphate isomerase A (ribose 5-phosphate epimerase)	0.748023	0.0507236	0.171041
Plate10	P21	NM_052963	TOP1MT	topoisomerase (DNA) I, mitochondrial	0.694447	0.0302688	0.145417
Plate10	P22	NM_001068	TOP2B	topoisomerase (DNA) II beta 180kDa	0.83942	0.226518	0.307294
Plate11	A01	NM_004618	TOP3A	topoisomerase (DNA) III alpha	0.699091	0.189693	0.283308
Plate11	A02	NM_007027	TOPBP1	topoisomerase (DNA) II binding protein 1	0.631913	0.17696	0.2779
Plate11	A03	NM_005742	TXNDC7	thioredoxin domain containing 7 (protein disulfide isomerase)	0.775737	0.107054	0.228073
Plate11	A04	NM_001724	BPGM	2,3-bisphosphoglycerate mutase	0.89899	0.367493	0.402892
Plate11	A05	NM_178230	COAS2	peptidylprolyl isomerase A (cyclophilin A)-like 4	0.736956	0.140308	0.252774
Plate11	A06	NM_021939	FKBP10	FK506 binding protein 10, 65 kDa	0.680303	0.0280914	0.140712
Plate11	A07	NM_017946	FKBP14	FK506 binding protein 14, 22 kDa	0.837609	0.258208	0.328639
Plate11	A08	NM_004116	FKBP1B	FK506 binding protein 1B, 12.6 kDa	0.715486	0.0498771	0.170478
Plate11	A09	NM_002013	FKBP3	FK506 binding protein 3, 25kDa	0.785231	0.119402	0.237257
Plate11	A10	NM_004117	FKBP5	FK506 binding protein 5	0.600817	0.00669167	0.0921147
Plate11	A11	NM_181342	FKBP7	FK506 binding protein 7	0.666878	0.153867	0.261659
Plate11	A12	NM_007270	FKBP9	FK506 binding protein 9, 63 kDa	0.926311	0.374738	0.408241
Plate11	A13	NM_138801	GALM	galactose mutarotase (aldose 1-epimerase)	0.729303	0.0892841	0.210709
Plate11	A14	NM_005471	GNPDA1	glucosamine-6-phosphate deaminase 1	0.639645	0.0373323	0.155176
Plate11	A15	NM_016368	ISYNA1	ISYNA1	0.82332	0.307269	0.360955
Plate11	A16	NM_000255	MUT	methylmalonyl Coenzyme A mutase	0.889884	0.257853	0.328566
Plate11	A17	NM_002629	PGAM1	phosphoglycerate mutase 1 (brain)	0.696831	0.00349194	0.0809895
Plate11	A18	NM_014485	PGDS	PGDS	1.06652	0.407544	0.432541
Plate11	A19	NM_018290	PGM2	phosphoglucomutase 2	0.675095	0.039837	0.158888
Plate11	A20	NM_021965	PGM5	phosphoglucomutase 5	0.799731	0.192088	0.285034
Plate11	A21	NM_000303	PMM2	phosphomannomutase 2	0.868121	0.301105	0.357057
Plate11	A22	NM_002859	PXN	paxillin	0.904902	0.393517	0.421217
Plate11	B01	NM_003935	TOP3B	topoisomerase (DNA) III beta	0.807645	0.192372	0.285225
Plate11	B02	NM_000365	TPI1	triosephosphate isomerase 1	0.825552	0.227516	0.307741
Plate11	B03	NM_001116	ADCY9	adenylate cyclase 9	0.705746	0.0796373	0.202486
Plate11	B04	NM_144581	C14orf149	chromosome 14 open reading frame 149	0.6023	0.0116555	0.106169
Plate11	B05	NM_001355	DDT	D-dopachrome tautomerase	0.633879	0.0124526	0.108249
Plate11	B06	NM_016594	FKBP11	FK506 binding protein 11, 19 kDa	0.792454	0.0115274	0.106052
Plate11	B07	NM_054014	FKBP1A	FK506 binding protein 1A, 12kDa	0.645765	0.000329063	0.0567634
Plate11	B08	NM_057092	FKBP2	FK506 binding protein 2, 13kDa	0.715944	0.0064744	0.0904777
Plate11	B09	NM_002014	FKBP4	FK506 binding protein 4, 59kDa	0.629863	0.000313288	0.0617624
Plate11	B10	NM_003602	FKBP6	FK506 binding protein 6, 36kDa	0.76845	0.0469586	0.166588
Plate11	B11	NM_012181	FKBP8	FK506 binding protein 8, 38kDa	0.818389	0.0735399	0.195728
Plate11	B12	NM_000403	GALE	UDP-galactose-4-epimerase	0.731473	0.0181465	0.120395
Plate11	B13	NM_015554	GLCE	GLCE	0.823756	0.0932533	0.214126
Plate11	B14	NM_138335	GNPDA2	glucosamine-6-phosphate deaminase 2	0.671617	0.00856202	0.0978517
Plate11	B15	NM_015342	KIAA0073	peptidylprolyl isomerase domain and WD repeat containing 1	0.807978	0.0998763	0.220703
Plate11	B16	NM_005385	NKTR	natural killer-tumor recognition sequence	0.809445	0.0456772	0.165228
Plate11	B17	NM_000290	PGAM2	phosphoglycerate mutase 2 (muscle)	0.693276	0.00479211	0.0867293
Plate11	B18	NM_002633	PGM1	phosphoglucomutase 1	0.66288	0.00311375	0.0781268
Plate11	B19	NM_015599	PGM3	phosphoglucomutase 3	0.74935	0.0297072	0.143972
Plate11	B20	NM_002676	PMM1	phosphomannomutase 1	0.64605	0.000254577	0.0610985
Plate11	B21	NM_000954	PTGDS	prostaglandin D2 synthase 21kDa (brain)	0.7079	0.0957836	0.217314
Plate11	B22	NM_002910	RENBP	renin binding protein	0.776966	0.00136282	0.0723341
Plate11	C01	NM_199229	RPE	ribulose-5-phosphate-3-epimerase	0.94501	0.427543	0.446723
Plate11	C02	NM_003102	SOD3	superoxide dismutase 3, extracellular	0.720832	0.0841082	0.205797
Plate11	C03	NM_003313	TSTA3	tissue specific transplantation antigen P35B	0.668747	0.0251078	0.136278
Plate11	C04	NM_017436	A4GALT	alpha 1,4-galactosyltransferase	0.775425	0.0174635	0.119011
Plate11	C05	NM_016228	AADAT	aminoadipate aminotransferase	0.793798	0.0343249	0.151336
Plate11	C06	NM_000663	ABAT	4-aminobutyrate aminotransferase	0.886233	0.266795	0.333342
Plate11	C07	NM_001607	ACAA1	acetyl-Coenzyme A acyltransferase 1 (peroxisomal 3-oxoacyl-Coenzyme A thiolase)	0.679894	0.0110782	0.105799
Plate11	C08	NM_000019	ACAT1	acetyl-Coenzyme A acetyltransferase 1 (acetoacetyl Coenzyme A thiolase)	0.782436	0.00918008	0.0999488
Plate11	C09	NM_001010983	AD-017	glycosyltransferase 8 domain containing 1	0.81241	0.045123	0.164844
Plate11	C10	NM_006411	AGPAT1	1-acylglycerol-3-phosphate O-acyltransferase 1 (lysophosphatidic acid acyltransferase, alpha)	0.89242	0.269326	0.33514
Plate11	C11	NM_020132	AGPAT3	1-acylglycerol-3-phosphate O-acyltransferase 3	0.826307	0.0610738	0.184122
Plate11	C12	NM_000030	AGXT	alanine-glyoxylate aminotransferase (oxalosis I; hyperoxaluria I; glycolicaciduria; serine-pyruvate aminotransferase)	0.833036	0.146778	0.257374
Plate11	C13	NM_031279	AGXT2L1	alanine-glyoxylate aminotransferase 2-like 1	0.741234	0.0524715	0.173128
Plate11	C14	NM_024105	ALG12	asparagine-linked glycosylation 12 homolog (yeast, alpha-1,6-mannosyltransferase)	0.742416	0.0836393	0.205469
Plate11	C15	NM_005787	ALG3	asparagine-linked glycosylation 3 homolog (yeast, alpha-1,3-mannosyltransferase)	0.909195	0.247933	0.322097
Plate11	C16	NM_013339	ALG6	asparagine-linked glycosylation 6 homolog (yeast, alpha-1,3-glucosyltransferase)	0.787521	0.080988	0.203391
Plate11	C17	NM_000481	AMT	aminomethyltransferase (glycine cleavage system protein T)	0.645665	0.000866183	0.0654976
Plate11	C18	NM_003491	ARD1	ARD1 homolog, N-acetyltransferase (S. cerevisiae)	0.982597	0.449404	0.462388
Plate11	C19	NM_001179	ART3	ADP-ribosyltransferase 3	0.857171	0.172327	0.27453
Plate11	C20	NM_004043	ASMT	acetylserotonin O-methyltransferase	0.705923	0.0164543	0.115704
Plate11	C21	NM_007041	ATE1	arginyltransferase 1	0.626082	0.0115264	0.10622
Plate11	C22	NM_020981	B3GALT1	UDP-Gal:betaGlcNAc beta 1,3-galactosyltransferase, polypeptide 1	0.849883	0.0478834	0.167395
Plate11	D01	NM_005869	SDCCAG10	serologically defined colon cancer antigen 10	0.696496	0.0852034	0.207373
Plate11	D02	NM_021947	SRR	serine racemase	0.776937	0.0269445	0.138228
Plate11	D03	NM_006701	TXNL4A	thioredoxin-like 4A	0.760455	0.00407047	0.0829114
Plate11	D04	NM_016161	A4GNT	alpha-1,4-N-acetylglucosaminyltransferase	0.772236	0.00977202	0.101585
Plate11	D05	NM_001088	AANAT	arylalkylamine N-acetyltransferase	0.733697	0.00421262	0.0842524
Plate11	D06	NM_020469	ABO	ABO blood group (transferase A, alpha 1-3-N-acetylgalactosaminyltransferase; transferase B, alpha 1-3-galactosyltransferase)	0.75051	0.0017959	0.0805965
Plate11	D07	NM_006111	ACAA2	acetyl-Coenzyme A acyltransferase 2 (mitochondrial 3-oxoacyl-Coenzyme A thiolase)	0.856416	0.305819	0.360095
Plate11	D08	NM_005891	ACAT2	acetyl-Coenzyme A acetyltransferase 2 (acetoacetyl Coenzyme A thiolase)	0.775136	0.0113753	0.106067
Plate11	D09	NM_000646	AGL	amylo-1, 6-glucosidase, 4-alpha-glucanotransferase (glycogen debranching enzyme, glycogen storage disease type III)	0.74176	0.000249754	0.0626655
Plate11	D10	NM_006412	AGPAT2	1-acylglycerol-3-phosphate O-acyltransferase 2 (lysophosphatidic acid acyltransferase, beta)	0.794841	4.86293e-05	0.0536868
Plate11	D11	NM_020133	AGPAT4	1-acylglycerol-3-phosphate O-acyltransferase 4 (lysophosphatidic acid acyltransferase, delta)	1.15317	0.184201	0.28088
Plate11	D12	NM_031900	AGXT2	alanine-glyoxylate aminotransferase 2	0.750502	0.00713671	0.0944715
Plate11	D13	NM_019109	ALG1	asparagine-linked glycosylation 1 homolog (yeast, beta-1,4-mannosyltransferase)	0.845274	0.081011	0.203356
Plate11	D14	NM_033087	ALG2	asparagine-linked glycosylation 2 homolog (yeast, alpha-1,3-mannosyltransferase)	0.845314	0.101294	0.221793
Plate11	D15	NM_013338	ALG5	asparagine-linked glycosylation 5 homolog (yeast, dolichyl-phosphate beta-glucosyltransferase)	0.769654	0.0223282	0.130701
Plate11	D16	NM_001007027	ALG8	asparagine-linked glycosylation 8 homolog (yeast, alpha-1,3-glucosyltransferase)	0.694781	0.00576141	0.0873708
Plate11	D17	NM_000485	APRT	adenine phosphoribosyltransferase	0.911389	0.175932	0.277153
Plate11	D18	NM_004314	ART1	ADP-ribosyltransferase 1	0.722035	0.0672935	0.189714
Plate11	D19	NM_053017	ART5	ADP-ribosyltransferase 5	0.75685	0.00771509	0.0963514
Plate11	D20	NM_004192	ASMTL	acetylserotonin O-methyltransferase-like	0.788499	0.0241522	0.134395
Plate11	D21	NM_004044	ATIC	5-aminoimidazole-4-carboxamide ribonucleotide formyltransferase/IMP cyclohydrolase	0.736213	0.0116229	0.106222
Plate11	D22	NM_003783	B3GALT2	UDP-Gal:betaGlcNAc beta 1,3-galactosyltransferase, polypeptide 2	0.877165	0.0498418	0.170674
Plate11	E01	NM_033169	B3GALT3	UDP-Gal:betaGlcNAc beta 1,3-galactosyltransferase, polypeptide 3	0.770947	0.243329	0.318439
Plate11	E02	NM_033172	B3GALT5	UDP-Gal:betaGlcNAc beta 1,3-galactosyltransferase, polypeptide 5	0.808056	0.0407305	0.160137
Plate11	E03	NM_054025	B3GAT1	beta-1,3-glucuronyltransferase 1 (glucuronosyltransferase P)	0.692885	0.0252204	0.136086
Plate11	E04	NM_012200	B3GAT3	beta-1,3-glucuronyltransferase 3 (glucuronosyltransferase I)	0.715257	0.0295104	0.144157
Plate11	E05	NM_014256	B3GNT3	UDP-GlcNAc:betaGal beta-1,3-N-acetylglucosaminyltransferase 3	0.604007	0.0011821	0.0686863
Plate11	E06	NM_032047	B3GNT5	UDP-GlcNAc:betaGal beta-1,3-N-acetylglucosaminyltransferase 5	0.835581	0.0412621	0.160399
Plate11	E07	NM_145236	B3GNT7	UDP-GlcNAc:betaGal beta-1,3-N-acetylglucosaminyltransferase 7	0.853119	0.177725	0.277916
Plate11	E08	NM_030587	B4GALT2	UDP-Gal:betaGlcNAc beta 1,4- galactosyltransferase, polypeptide 2	0.717369	0.00386861	0.081819
Plate11	E09	NM_003778	B4GALT4	UDP-Gal:betaGlcNAc beta 1,4- galactosyltransferase, polypeptide 4	0.772868	0.0150037	0.112528
Plate11	E10	NM_004775	B4GALT6	UDP-Gal:betaGlcNAc beta 1,4- galactosyltransferase, polypeptide 6	0.776077	0.0201594	0.125174
Plate11	E11	NM_001701	BAAT	bile acid Coenzyme A: amino acid N-acyltransferase (glycine N-choloyltransferase)	0.759872	0.0339002	0.15091
Plate11	E12	NM_001190	BCAT2	branched chain aminotransferase 2, mitochondrial	0.80281	0.00236528	0.0810955
Plate11	E13	NM_017614	BHMT2	betaine-homocysteine methyltransferase 2	0.753152	0.0021904	0.0795459
Plate11	E14	NM_001011551	C1GALT2	C1GALT1-specific chaperone 1	0.8486	0.123863	0.240579
Plate11	E15	NM_016591	C2GNT3	C2GNT3	0.675676	0.012223	0.107438
Plate11	E16	NM_022900	CAS1	CAS1	0.773561	0.0603527	0.183451
Plate11	E17	NM_145752	CDIPT	CDP-diacylglycerol--inositol 3-phosphatidyltransferase (phosphatidylinositol synthase)	0.683234	0.00236882	0.0807154
Plate11	E18	NM_003818	CDS2	CDP-diacylglycerol synthase (phosphatidate cytidylyltransferase) 2	0.756805	0.00249543	0.079623
Plate11	E19	NM_020549	CHAT	choline acetyltransferase	0.747041	0.0120242	0.10775
Plate11	E20	NM_020244	CHPT1	choline phosphotransferase 1	0.849665	0.0554268	0.176547
Plate11	E21	NM_004854	CHST10	carbohydrate sulfotransferase 10	0.79979	0.0126733	0.10846
Plate11	E22	NM_018641	CHST12	carbohydrate (chondroitin 4) sulfotransferase 12	0.681801	0.00272908	0.0801303
Plate11	F01	NM_003782	B3GALT4	UDP-Gal:betaGlcNAc beta 1,3-galactosyltransferase, polypeptide 4	0.840704	0.273964	0.33847
Plate11	F02	NM_080605	B3GALT6	UDP-Gal:betaGal beta 1,3-galactosyltransferase polypeptide 6	0.706542	0.0360527	0.153085
Plate11	F03	NM_080742	B3GAT2	beta-1,3-glucuronyltransferase 2 (glucuronosyltransferase S)	0.722822	0.00799349	0.0957138
Plate11	F04	NM_006577	B3GNT1	UDP-GlcNAc:betaGal beta-1,3-N-acetylglucosaminyltransferase 1	0.762737	0.0571389	0.179106
Plate11	F05	NM_030765	B3GNT4	UDP-GlcNAc:betaGal beta-1,3-N-acetylglucosaminyltransferase 4	0.828735	0.114991	0.233879
Plate11	F06	NM_006876	B3GNT6	UDP-GlcNAc:betaGal beta-1,3-N-acetylglucosaminyltransferase 6	0.706021	0.00501118	0.0848519
Plate11	F07	NM_001497	B4GALT1	UDP-Gal:betaGlcNAc beta 1,4- galactosyltransferase, polypeptide 1	0.744904	0.0403266	0.159686
Plate11	F08	NM_003779	B4GALT3	UDP-Gal:betaGlcNAc beta 1,4- galactosyltransferase, polypeptide 3	0.974386	0.424008	0.444375
Plate11	F09	NM_004776	B4GALT5	UDP-Gal:betaGlcNAc beta 1,4- galactosyltransferase, polypeptide 5	0.83019	0.0386862	0.157368
Plate11	F10	NM_007255	B4GALT7	xylosylprotein beta 1,4-galactosyltransferase, polypeptide 7 (galactosyltransferase I)	0.575962	0.000584722	0.0733561
Plate11	F11	NM_005504	BCAT1	branched chain aminotransferase 1, cytosolic	0.942051	0.365729	0.402638
Plate11	F12	NM_001713	BHMT	betaine-homocysteine methyltransferase	0.752582	0.000575639	0.0738959
Plate11	F13	NM_020156	C1GALT1	core 1 synthase, glycoprotein-N-acetylgalactosamine 3-beta-galactosyltransferase, 1	0.731267	0.00444283	0.0857497
Plate11	F14	NM_182749	C21orf127	chromosome 21 open reading frame 127	0.71664	0.000792506	0.0662823
Plate11	F15	NM_199141	CARM1	coactivator-associated arginine methyltransferase 1	0.798838	0.150271	0.258974
Plate11	F16	NM_004059	CCBL1	cysteine conjugate-beta lyase; cytoplasmic (glutamine transaminase K, kyneurenine aminotransferase)	0.861152	0.183288	0.280419
Plate11	F17	NM_001263	CDS1	CDP-diacylglycerol synthase (phosphatidate cytidylyltransferase) 1	0.815327	0.00540636	0.0865018
Plate11	F18	NM_001007794	CEPT1	choline/ethanolamine phosphotransferase 1	0.724594	0.0520281	0.172697
Plate11	F19	NM_018371	ChGn	ChGn	0.778668	0.0697672	0.192558
Plate11	F20	NM_003654	CHST1	carbohydrate (keratan sulfate Gal-6) sulfotransferase 1	0.64443	0.00446457	0.0855709
Plate11	F21	NM_018413	CHST11	carbohydrate (chondroitin 4) sulfotransferase 11	0.609436	0.00222495	0.0802728
Plate11	F22	NM_152889	CHST13	carbohydrate (chondroitin 4) sulfotransferase 13	0.675142	0.0253295	0.136143
Plate11	G01	NM_004267	CHST2	carbohydrate (N-acetylglucosamine-6-O) sulfotransferase 2	0.822346	0.257919	0.328498
Plate11	G02	NM_005769	CHST4	carbohydrate (N-acetylglucosamine 6-O) sulfotransferase 4	0.872032	0.304798	0.359582
Plate11	G03	NM_021615	CHST6	carbohydrate (N-acetylglucosamine 6-O) sulfotransferase 6	0.66556	0.0108472	0.104679
Plate11	G04	NM_022467	CHST8	carbohydrate (N-acetylgalactosamine 4-0) sulfotransferase 8	0.750979	0.0182952	0.120512
Plate11	G05	NM_016347	CML2	CML2	0.626722	0.0111975	0.106021
Plate11	G06	NM_017421	COQ3	coenzyme Q3 homolog, methyltransferase (yeast)	0.737369	0.00150752	0.0763444
Plate11	G07	NM_152245	CPT1B	carnitine palmitoyltransferase 1B (muscle)	0.812918	0.0366112	0.154152
Plate11	G08	NM_000098	CPT2	carnitine palmitoyltransferase II	0.80026	0.0411514	0.160308
Plate11	G09	NM_021151	CROT	carnitine O-octanoyltransferase	0.810549	0.0550934	0.175993
Plate11	G10	NM_005216	DDOST	dolichyl-diphosphooligosaccharide-protein glycosyltransferase	0.832068	0.150076	0.258881
Plate11	G11	NM_032564	DGAT2	diacylglycerol O-acyltransferase homolog 2 (mouse)	0.711927	0.00240019	0.0802971
Plate11	G12	NM_019100	DMAP1	DNA methyltransferase 1 associated protein 1	0.86808	0.124579	0.24112
Plate11	G13	NM_176084	DNMT2	DNA (cytosine-5-)-methyltransferase 2	0.795107	0.0103211	0.103587
Plate11	G14	NM_175849	DNMT3B	DNA (cytosine-5-)-methyltransferase 3 beta	0.757094	0.00285798	0.0788802
Plate11	G15	NM_001017520	DNTT	deoxynucleotidyltransferase, terminal	1.09043	0.294935	0.353308
Plate11	G16	NM_203316	DPAGT1	dolichyl-phosphate (UDP-N-acetylglucosamine) N-acetylglucosaminephosphotransferase 1 (GlcNAc-1-P transferase)	0.849237	0.0323226	0.148436
Plate11	G17	NM_003863	DPM2	dolichyl-phosphate mannosyltransferase polypeptide 2, regulatory subunit	0.732327	0.00967115	0.101299
Plate11	G18	NM_004462	FDFT1	farnesyl-diphosphate farnesyltransferase 1	0.779509	0.0107404	0.104195
Plate11	G19	NM_018146	FLJ10581	RNA methyltransferase like 1	0.715771	0.0811659	0.203099
Plate11	G20	NM_001018677	FNTA	farnesyltransferase, CAAX box, alpha	0.931783	0.25326	0.325797
Plate11	G21	NM_006657	FTCD	formiminotransferase cyclodeaminase	0.688383	0.0230971	0.131439
Plate11	G22	NM_032664	FUT10	fucosyltransferase 10 (alpha (1,3) fucosyltransferase)	0.811122	0.052628	0.173333
Plate11	H01	NM_004273	CHST3	carbohydrate (chondroitin 6) sulfotransferase 3	0.649336	0.07741	0.200048
Plate11	H02	NM_012126	CHST5	carbohydrate (N-acetylglucosamine 6-O) sulfotransferase 5	0.727581	0.0413333	0.160225
Plate11	H03	NM_019886	CHST7	carbohydrate (N-acetylglucosamine 6-O) sulfotransferase 7	0.670424	0.00617521	0.089703
Plate11	H04	NM_031422	CHST9	carbohydrate (N-acetylgalactosamine 4-0) sulfotransferase 9	0.704738	0.0457091	0.165235
Plate11	H05	NM_007310	COMT	catechol-O-methyltransferase	0.734785	0.00454388	0.0847372
Plate11	H06	NM_001876	CPT1A	carnitine palmitoyltransferase 1A (liver)	0.54638	0.0023785	0.0805481
Plate11	H07	NM_152359	CPT1C	carnitine palmitoyltransferase 1C	0.792551	0.0258265	0.136423
Plate11	H08	NM_004003	CRAT	carnitine acetyltransferase	0.725518	0.038255	0.156305
Plate11	H09	NM_130468	D4ST1	dermatan 4 sulfotransferase 1	0.855782	0.232619	0.311286
Plate11	H10	NM_012079	DGAT1	diacylglycerol O-acyltransferase homolog 1 (mouse)	0.883336	0.186105	0.281528
Plate11	H11	NM_001933	DLST	dihydrolipoamide S-succinyltransferase (E2 component of 2-oxo-glutarate complex)	0.764154	0.110383	0.230191
Plate11	H12	NM_001379	DNMT1	DNA (cytosine-5-)-methyltransferase 1	0.804343	0.0476665	0.16706
Plate11	H13	NM_175629	DNMT3A	DNA (cytosine-5-)-methyltransferase 3 alpha	0.8073	0.0798641	0.20241
Plate11	H14	NM_175867	DNMT3L	DNA (cytosine-5-)-methyltransferase 3-like	0.938324	0.313402	0.364821
Plate11	H15	NM_032482	DOT1L	DOT1-like, histone H3 methyltransferase (S. cerevisiae)	0.714637	0.00357564	0.0805614
Plate11	H16	NM_003859	DPM1	dolichyl-phosphate mannosyltransferase polypeptide 1, catalytic subunit	0.734269	0.0237199	0.133743
Plate11	H17	NM_024757	EHMT1	euchromatic histone methyltransferase 1	0.755702	0.0482258	0.16806
Plate11	H18	NM_002004	FDPS	farnesyl diphosphate synthase (farnesyl pyrophosphate synthetase, dimethylallyltranstransferase, geranyltranstransferase)	0.807248	0.0497314	0.17072
Plate11	H19	NM_017739	FLJ20277	protein O-linked mannose beta1,2-N-acetylglucosaminyltransferase	0.854379	0.128061	0.243338
Plate11	H20	NM_003838	FPGT	fucose-1-phosphate guanylyltransferase	0.762517	0.0123736	0.107732
Plate11	H21	NM_000148	FUT1	fucosyltransferase 1 (galactoside 2-alpha-L-fucosyltransferase)	0.777553	0.0198308	0.124393
Plate11	H22	NM_173540	FUT11	fucosyltransferase 11 (alpha (1,3) fucosyltransferase)	0.725662	0.00420459	0.0843976
Plate11	I01	NM_000511	FUT2	fucosyltransferase 2 (secretor status included)	0.859926	0.288722	0.348588
Plate11	I02	NM_002033	FUT4	fucosyltransferase 4 (alpha (1,3) fucosyltransferase, myeloid-specific)	0.775016	0.0038991	0.0821489
Plate11	I03	NM_000150	FUT6	fucosyltransferase 6 (alpha (1,3) fucosyltransferase)	0.582778	0.0218182	0.129641
Plate11	I04	NM_178155	FUT8	fucosyltransferase 8 (alpha (1,6) fucosyltransferase)	0.688312	0.00694816	0.0930919
Plate11	I05	NM_004861	GAL3ST1	galactose-3-O-sulfotransferase 1	0.820521	0.0258353	0.136339
Plate11	I06	NM_153446	GALGT2	UDP-GalNAc:Neu5Acalpha2-3Galbeta-R beta1,4-N-acetylgalactosaminyltransferase	0.572873	0.0011754	0.0705242
Plate11	I07	NM_198321	GALNT10	UDP-N-acetyl-alpha-D-galactosamine:polypeptide N-acetylgalactosaminyltransferase 10 (GalNAc-T10)	0.833083	0.0791891	0.202466
Plate11	I08	NM_024642	GALNT12	UDP-N-acetyl-alpha-D-galactosamine:polypeptide N-acetylgalactosaminyltransferase 12 (GalNAc-T12)	0.777557	0.0222026	0.130381
Plate11	I09	NM_004481	GALNT2	UDP-N-acetyl-alpha-D-galactosamine:polypeptide N-acetylgalactosaminyltransferase 2 (GalNAc-T2)	0.814814	0.0255724	0.136386
Plate11	I10	NM_003774	GALNT4	UDP-N-acetyl-alpha-D-galactosamine:polypeptide N-acetylgalactosaminyltransferase 4 (GalNAc-T4)	0.751176	0.000388379	0.057942
Plate11	I11	NM_007210	GALNT6	UDP-N-acetyl-alpha-D-galactosamine:polypeptide N-acetylgalactosaminyltransferase 6 (GalNAc-T6)	0.864649	0.110934	0.230557
Plate11	I12	NM_017417	GALNT8	UDP-N-acetyl-alpha-D-galactosamine:polypeptide N-acetylgalactosaminyltransferase 8 (GalNAc-T8)	0.819488	0.0331421	0.149709
Plate11	I13	NM_054110	GALNTL2	UDP-N-acetyl-alpha-D-galactosamine:polypeptide N-acetylgalactosaminyltransferase-like 2	0.899426	0.234068	0.311939
Plate11	I14	NM_147132	GALT	galactose-1-phosphate uridylyltransferase	0.675968	0.0319167	0.14805
Plate11	I15	NM_175085	GART	phosphoribosylglycinamide formyltransferase, phosphoribosylglycinamide synthetase, phosphoribosylaminoimidazole synthetase	0.899418	0.0680329	0.190727
Plate11	I16	NM_014291	GCAT	glycine C-acetyltransferase (2-amino-3-ketobutyrate coenzyme A ligase)	0.799152	0.000176716	0.0573809
Plate11	I17	NM_001491	GCNT2	glucosaminyl (N-acetyl) transferase 2, I-branching enzyme	0.78233	0.04831	0.168035
Plate11	I18	XM_371427	GGT2	gamma-glutamyltransferase 2	0.73536	0.0112277	0.105943
Plate11	I19	NM_018960	GNMT	glycine N-methyltransferase	0.686478	0.0373668	0.15497
Plate11	I20	NM_198066	GNPNAT1	glucosamine-phosphate N-acetyltransferase 1	0.639194	0.0135816	0.110251
Plate11	I21	NM_002080	GOT2	glutamic-oxaloacetic transaminase 2, mitochondrial (aspartate aminotransferase 2)	0.72928	0.00571144	0.0878193
Plate11	I22	NM_005309	GPT	glutamic-pyruvate transaminase (alanine aminotransferase)	0.626783	0.00118135	0.069373
Plate11	J01	NM_000149	FUT3	fucosyltransferase 3 (galactoside 3(4)-L-fucosyltransferase, Lewis blood group included)	0.789822	0.164345	0.268796
Plate11	J02	NM_002034	FUT5	fucosyltransferase 5 (alpha (1,3) fucosyltransferase)	0.832978	0.137023	0.250369
Plate11	J03	NM_004479	FUT7	fucosyltransferase 7 (alpha (1,3) fucosyltransferase)	0.832487	0.0701662	0.192408
Plate11	J04	NM_006581	FUT9	fucosyltransferase 9 (alpha (1,3) fucosyltransferase)	0.726369	9.43934e-05	0.0473683
Plate11	J05	NM_001478	GALGT	UDP-N-acetyl-alpha-D-galactosamine:(N-acetylneuraminyl)-galactosylglucosylceramide N-acetylgalactosaminyltransferase (GalNAc-T)	0.720054	8.68697e-05	0.0532801
Plate11	J06	NM_020474	GALNT1	UDP-N-acetyl-alpha-D-galactosamine:polypeptide N-acetylgalactosaminyltransferase 1 (GalNAc-T1)	0.685915	0.00285423	0.0791725
Plate11	J07	NM_022087	GALNT11	UDP-N-acetyl-alpha-D-galactosamine:polypeptide N-acetylgalactosaminyltransferase 11 (GalNAc-T11)	0.733515	0.00133527	0.0715599
Plate11	J08	NM_024572	GALNT14	UDP-N-acetyl-alpha-D-galactosamine:polypeptide N-acetylgalactosaminyltransferase 14 (GalNAc-T14)	0.825732	0.0231369	0.13153
Plate11	J09	NM_004482	GALNT3	UDP-N-acetyl-alpha-D-galactosamine:polypeptide N-acetylgalactosaminyltransferase 3 (GalNAc-T3)	0.853719	0.00268164	0.0817825
Plate11	J10	NM_014568	GALNT5	UDP-N-acetyl-alpha-D-galactosamine:polypeptide N-acetylgalactosaminyltransferase 5 (GalNAc-T5)	0.812511	0.0466322	0.166071
Plate11	J11	NM_017423	GALNT7	UDP-N-acetyl-alpha-D-galactosamine:polypeptide N-acetylgalactosaminyltransferase 7 (GalNAc-T7)	0.741846	0.0101551	0.103616
Plate11	J12	NM_021808	GALNT9	UDP-N-acetyl-alpha-D-galactosamine:polypeptide N-acetylgalactosaminyltransferase 9 (GalNAc-T9)	0.895166	0.0138069	0.110295
Plate11	J13	NM_145292	GALNTL5	UDP-N-acetyl-alpha-D-galactosamine:polypeptide N-acetylgalactosaminyltransferase-like 5	0.827507	0.0256376	0.136207
Plate11	J14	NM_000156	GAMT	guanidinoacetate N-methyltransferase	0.727312	0.0007933	0.0653585
Plate11	J15	NM_001482	GATM	glycine amidinotransferase (L-arginine:glycine amidinotransferase)	1.02495	0.422718	0.443528
Plate11	J16	NM_001490	GCNT1	glucosaminyl (N-acetyl) transferase 1, core 2 (beta-1,6-N-acetylglucosaminyltransferase)	0.835847	0.000705749	0.0695667
Plate11	J17	NM_004751	GCNT3	glucosaminyl (N-acetyl) transferase 3, mucin type	0.819994	0.179088	0.278626
Plate11	J18	NM_005838	GLYAT	glycine-N-acyltransferase	0.846962	0.166026	0.270025
Plate11	J19	NM_014236	GNPAT	glyceronephosphate O-acyltransferase	0.784592	0.00793351	0.0964603
Plate11	J20	NM_002079	GOT1	glutamic-oxaloacetic transaminase 1, soluble (aspartate aminotransferase 1)	0.991601	0.46941	0.477102
Plate11	J21	NM_020918	GPAM	glycerol-3-phosphate acyltransferase, mitochondrial	0.700424	0.100363	0.221072
Plate11	J22	NM_133443	GPT2	glutamic pyruvate transaminase (alanine aminotransferase) 2	0.710924	0.122974	0.239695
Plate11	K01	NM_145740	GSTA1	glutathione S-transferase A1	0.69089	0.172701	0.274729
Plate11	K02	NM_000847	GSTA3	glutathione S-transferase A3	0.841629	0.0178905	0.119995
Plate11	K03	NM_153699	GSTA5	glutathione S-transferase A5	0.644761	0.00443092	0.0858199
Plate11	K04	NM_146421	GSTM1	glutathione S-transferase M1	0.662237	0.00631914	0.0899012
Plate11	K05	NM_000849	GSTM3	glutathione S-transferase M3 (brain)	0.797462	0.013161	0.109411
Plate11	K06	NM_000851	GSTM5	glutathione S-transferase M5	0.749551	0.00572221	0.0874974
Plate11	K07	NM_183239	GSTO2	glutathione S-transferase omega 2	0.667527	0.0120436	0.1074
Plate11	K08	NM_000853	GSTT1	glutathione S-transferase theta 1	0.765297	0.00112077	0.0736506
Plate11	K09	NM_003642	HAT1	histone acetyltransferase 1	0.798927	0.0246641	0.134932
Plate11	K10	NM_006895	HNMT	histamine N-methyltransferase	0.736772	9.27401e-06	0.0511925
Plate11	K11	NM_206962	HRMT1L1	HMT1 hnRNP methyltransferase-like 1 (S. cerevisiae)	0.795311	0.111769	0.231246
Plate11	K12	NM_005788	HRMT1L3	HMT1 hnRNP methyltransferase-like 3 (S. cerevisiae)	0.695249	0.000893421	0.0648906
Plate11	K13	NM_018137	HRMT1L6	HMT1 hnRNP methyltransferase-like 6 (S. cerevisiae)	0.78061	0.0498426	0.170571
Plate11	K14	NM_006040	HS3ST4	heparan sulfate (glucosamine) 3-O-sulfotransferase 4	0.798143	0.0908111	0.211777
Plate11	K15	NM_147175	HS6ST2	heparan sulfate 6-O-sulfotransferase 2	0.754919	0.0135714	0.11033
Plate11	K16	NM_014473	HSA9761	HSA9761	0.730594	0.00615973	0.0897142
Plate11	K17	NM_138706	IMAGE:4907098	IMAGE:4907098	0.728948	0.00800012	0.0955859
Plate11	K18	NM_133642	LARGE	like-glycosyltransferase	0.746513	0.182652	0.280222
Plate11	K19	NM_016015	LCMT1	leucine carboxyl methyltransferase 1	0.810651	0.00881366	0.0982856
Plate11	K20	NM_145196	LIPT1	lipoyltransferase 1	0.789081	0.0229741	0.13101
Plate11	K21	NM_018361	LPAAT-e	1-acylglycerol-3-phosphate O-acyltransferase 5 (lysophosphatidic acid acyltransferase, epsilon)	0.897024	0.259656	0.329343
Plate11	K22	NM_000429	MAT1A	methionine adenosyltransferase I, alpha	0.71647	0.0228489	0.131108
Plate11	L01	NM_000846	GSTA2	glutathione S-transferase A2	0.726674	0.0297709	0.144154
Plate11	L02	NM_001512	GSTA4	glutathione S-transferase A4	0.691429	0.0645865	0.186268
Plate11	L03	NM_015917	GSTK1	glutathione S-transferase kappa 1	0.725142	0.00322214	0.0783534
Plate11	L04	NM_000848	GSTM2	glutathione S-transferase M2 (muscle)	0.686982	0.00097302	0.0679882
Plate11	L05	NM_147149	GSTM4	glutathione S-transferase M4	1.05966	0.214377	0.299813
Plate11	L06	NM_004832	GSTO1	glutathione S-transferase omega 1	0.684233	0.000838346	0.0661096
Plate11	L07	NM_000852	GSTP1	glutathione S-transferase pi	0.873002	0.19352	0.285776
Plate11	L08	NM_000854	GSTT2	glutathione S-transferase theta 2	0.718792	0.000658687	0.0712932
Plate11	L09	NM_013244	HGNT-IV-H	HGNT-IV-H	0.739981	0.000481354	0.0664268
Plate11	L10	NM_000194	HPRT1	hypoxanthine phosphoribosyltransferase 1 (Lesch-Nyhan syndrome)	0.834992	0.000143153	0.0526804
Plate11	L11	NM_198319	HRMT1L2	HMT1 hnRNP methyltransferase-like 2 (S. cerevisiae)	0.672839	0.000935436	0.0670598
Plate11	L12	NM_019854	HRMT1L4	HMT1 hnRNP methyltransferase-like 4 (S. cerevisiae)	0.692131	0.0343659	0.151276
Plate11	L13	NM_012262	HS2ST1	heparan sulfate 2-O-sulfotransferase 1	0.953862	0.34509	0.386233
Plate11	L14	NM_004807	HS6ST1	heparan sulfate 6-O-sulfotransferase 1	0.734664	0.00870777	0.097697
Plate11	L15	NM_153456	HS6ST3	heparan sulfate 6-O-sulfotransferase 3	0.784828	0.0117287	0.106659
Plate11	L16	NM_170705	ICMT	isoprenylcysteine carboxyl methyltransferase	0.635702	0.00351399	0.0801539
Plate11	L17	NM_006774	INMT	indolethylamine N-methyltransferase	0.777292	0.0174336	0.118954
Plate11	L18	NM_000229	LCAT	lecithin-cholesterol acyltransferase	0.815152	0.00595366	0.0881077
Plate11	L19	NM_014793	LCMT2	leucine carboxyl methyltransferase 2	0.82059	0.0605113	0.183731
Plate11	L20	NM_031302	LOC83468	glycosyltransferase 8 domain containing 2	0.704136	0.0369374	0.154348
Plate11	L21	NM_004744	LRAT	lecithin retinol acyltransferase (phosphatidylcholine--retinol O-acyltransferase)	0.870754	0.0385329	0.156975
Plate11	L22	NM_005911	MAT2A	methionine adenosyltransferase II, alpha	0.690322	0.0011085	0.0746213
Plate11	M01	NM_023033	METTL1	methyltransferase-like 1	0.860724	0.373326	0.407265
Plate11	M02	NM_002406	MGAT1	mannosyl (alpha-1,3-)-glycoprotein beta-1,2-N-acetylglucosaminyltransferase	0.78322	0.0762697	0.198495
Plate11	M03	NM_002409	MGAT3	mannosyl (beta-1,4-)-glycoprotein beta-1,4-N-acetylglucosaminyltransferase	0.747731	0.0112358	0.105839
Plate11	M04	NM_014275	MGAT4B	mannosyl (alpha-1,3-)-glycoprotein beta-1,4-N-acetylglucosaminyltransferase, isoenzyme B	0.631641	0.00230324	0.0804675
Plate11	M05	NM_031472	MGC11134	MGC11134	0.882064	0.0614552	0.184265
Plate11	M06	NM_145792	MGST1	microsomal glutathione S-transferase 1	0.730059	0.000128854	0.0547132
Plate11	M07	NM_004528	MGST3	microsomal glutathione S-transferase 3	0.812285	0.0736566	0.195944
Plate11	M08	NM_025098	MOGAT2	monoacylglycerol O-acyltransferase 2	0.928251	0.272043	0.336925
Plate11	M09	NM_001013440	MPST	mercaptopyruvate sulfurtransferase	0.788902	0.145926	0.256941
Plate11	M10	NM_139242	MtFMT	MtFMT	0.775469	0.00572323	0.0872713
Plate11	M11	NM_000662	NAT1	N-acetyltransferase 1 (arylamine N-acetyltransferase)	0.919535	0.117483	0.235993
Plate11	M12	NM_181528	NAT5	N-acetyltransferase 5 (ARD1 homolog, S. cerevisiae)	0.795878	0.0244648	0.134374
Plate11	M13	NM_022787	NMNAT1	nicotinamide nucleotide adenylyltransferase 1	0.915405	0.222129	0.304558
Plate11	M14	NM_178177	NMNAT3	nicotinamide nucleotide adenylyltransferase 3	0.808749	0.045363	0.165065
Plate11	M15	NM_004808	NMT2	N-myristoyltransferase 2	0.843309	0.159265	0.265122
Plate11	M16	NM_000274	OAT	ornithine aminotransferase (gyrate atrophy)	0.737995	0.00530667	0.0861553
Plate11	M17	NM_181673	OGT	O-linked N-acetylglucosamine (GlcNAc) transferase (UDP-N-acetylglucosamine:polypeptide-N-acetylglucosaminyl transferase)	0.851532	0.296942	0.354634
Plate11	M18	NM_000436	OXCT1	3-oxoacid CoA transferase 1	0.802199	0.0375061	0.154965
Plate11	M19	NM_001618	PARP1	poly (ADP-ribose) polymerase family, member 1	0.800192	0.055087	0.176176
Plate11	M20	NM_005485	PARP3	poly (ADP-ribose) polymerase family, member 3	0.813327	0.0105326	0.103452
Plate11	M21	NM_005389	PCMT1	protein-L-isoaspartate (D-aspartate) O-methyltransferase	0.694859	0.0298788	0.144423
Plate11	M22	NM_004845	PCYT1B	phosphate cytidylyltransferase 1, choline, beta isoform	0.846609	0.0958904	0.217378
Plate11	N01	NM_018396	METTL2	methyltransferase like 2	0.695512	0.0335762	0.150806
Plate11	N02	NM_001015883	MGAT2	mannosyl (alpha-1,6-)-glycoprotein beta-1,2-N-acetylglucosaminyltransferase	0.695004	0.0176364	0.119451
Plate11	N03	NM_012214	MGAT4A	mannosyl (alpha-1,3-)-glycoprotein beta-1,4-N-acetylglucosaminyltransferase, isoenzyme A	0.560189	0.0103896	0.103896
Plate11	N04	NM_002410	MGAT5	mannosyl (alpha-1,6-)-glycoprotein beta-1,6-N-acetyl-glucosaminyltransferase	0.650583	0.00774678	0.0960949
Plate11	N05	NM_002412	MGMT	O-6-methylguanine-DNA methyltransferase	0.709612	0.00730571	0.0948883
Plate11	N06	NM_002413	MGST2	microsomal glutathione S-transferase 2	0.782948	0.138094	0.251162
Plate11	N07	NM_058165	MOGAT1	monoacylglycerol O-acyltransferase 1	0.760057	0.0611886	0.184166
Plate11	N08	NM_178176	MOGAT3	monoacylglycerol O-acyltransferase 3	0.887743	0.0568468	0.1788
Plate11	N09	NM_014507	MT	MT	0.85901	0.031831	0.147777
Plate11	N10	NM_000254	MTR	5-methyltetrahydrofolate-homocysteine methyltransferase	0.782671	0.00120808	0.0687483
Plate11	N11	NM_000015	NAT2	N-acetyltransferase 2 (arylamine N-acetyltransferase)	0.721582	0.0468871	0.166549
Plate11	N12	NM_003960	NAT8	N-acetyltransferase 8 (camello like)	0.856336	0.213242	0.299286
Plate11	N13	NM_170706	NMNAT2	nicotinamide nucleotide adenylyltransferase 2	0.586557	0.015877	0.114116
Plate11	N14	NM_021079	NMT1	N-myristoyltransferase 1	0.777726	0.00572795	0.0871028
Plate11	N15	NM_006169	NNMT	nicotinamide N-methyltransferase	0.681028	0.00208205	0.079812
Plate11	N16	XM_047025	OATL1	ornithine aminotransferase-like 1	0.886342	0.16246	0.267616
Plate11	N17	NM_000531	OTC	ornithine carbamoyltransferase	0.8593	0.249136	0.322748
Plate11	N18	NM_022120	OXCT2	3-oxoacid CoA transferase 2	0.638353	0.00713932	0.09428
Plate11	N19	NM_005484	PARP2	poly (ADP-ribose) polymerase family, member 2	0.769727	0.0700944	0.192498
Plate11	N20	NM_006437	PARP4	poly (ADP-ribose) polymerase family, member 4	0.795354	0.211307	0.298316
Plate11	N21	NM_005017	PCYT1A	phosphate cytidylyltransferase 1, choline, alpha isoform	0.79353	0.12035	0.2376
Plate11	N22	NM_002861	PCYT2	phosphate cytidylyltransferase 2, ethanolamine	0.842566	0.155291	0.262384
Plate11	O01	NM_148173	PEMT	phosphatidylethanolamine N-methyltransferase	0.794604	0.349013	0.389359
Plate11	O02	NM_002686	PNMT	phenylethanolamine N-methyltransferase	0.693801	0.0806093	0.202902
Plate11	O03	NM_172236	POFUT1	protein O-fucosyltransferase 1	0.521361	0.0160409	0.114697
Plate11	O04	NM_013382	POMT2	protein-O-mannosyltransferase 2	0.63741	0.0389863	0.157428
Plate11	O05	NM_020200	PRTFDC1	phosphoribosyl transferase domain containing 1	0.902286	0.414884	0.43814
Plate11	O06	NM_012413	QPCT	glutaminyl-peptide cyclotransferase (glutaminyl cyclase)	0.663632	0.0312606	0.147992
Plate11	O07	NM_182836	RABGGTA	Rab geranylgeranyltransferase, alpha subunit	0.776114	0.0742325	0.196247
Plate11	O08	NM_002970	SAT	spermidine/spermine N1-acetyltransferase	0.728708	0.0838169	0.205631
Plate11	O09	NM_148918	SHMT1	serine hydroxymethyltransferase 1 (soluble)	0.672945	0.0978661	0.219156
Plate11	O10	NM_173217	SIAT1	ST6 beta-galactosamide alpha-2,6-sialyltranferase 1	0.761677	0.206281	0.294687
Plate11	O11	NM_003033	SIAT4A	ST3 beta-galactoside alpha-2,3-sialyltransferase 1	0.71581	0.0940366	0.215119
Plate11	O12	NM_006278	SIAT4C	ST3 beta-galactoside alpha-2,3-sialyltransferase 4	0.893289	0.260955	0.329553
Plate11	O13	NM_018414	SIAT7A	ST6 (alpha-N-acetyl-neuraminyl-2,3-beta-galactosyl-1,3)-N-acetylgalactosaminide alpha-2,6-sialyltransferase 1	0.760538	0.111006	0.230445
Plate11	O14	NM_152996	SIAT7C	ST6 (alpha-N-acetyl-neuraminyl-2,3-beta-galactosyl-1,3)-N-acetylgalactosaminide alpha-2,6-sialyltransferase 3	0.754995	0.12085	0.237653
Plate11	O15	NM_030965	SIAT7E	ST6 (alpha-N-acetyl-neuraminyl-2,3-beta-galactosyl-1,3)-N-acetylgalactosaminide alpha-2,6-sialyltransferase 5	0.859848	0.279438	0.342472
Plate11	O16	NM_003034	SIAT8A	ST8 alpha-N-acetyl-neuraminide alpha-2,8-sialyltransferase 1	0.735578	0.0586462	0.181055
Plate11	O17	NM_015879	SIAT8C	ST8 alpha-N-acetyl-neuraminide alpha-2,8-sialyltransferase 3	0.721382	0.00190909	0.081063
Plate11	O18	NM_013305	SIAT8E	ST8 alpha-N-acetyl-neuraminide alpha-2,8-sialyltransferase 5	0.760012	0.048616	0.168674
Plate11	O19	NM_025163	SMP3	SMP3	0.758248	0.00508815	0.0853695
Plate11	O20	NM_003578	SOAT2	sterol O-acyltransferase 2	0.731366	0.0463825	0.166254
Plate11	O21	NM_004863	SPTLC2	serine palmitoyltransferase, long chain base subunit 2	0.683802	0.00581955	0.0875311
Plate11	O22	NM_177536	SULT1A1	sulfotransferase family, cytosolic, 1A, phenol-preferring, member 1	0.855069	0.185158	0.281331
Plate11	P01	NM_012393	PFAS	phosphoribosylformylglycinamidine synthase (FGAR amidotransferase)	0.647116	0.165651	0.269892
Plate11	P02	NM_033109	PNPT1	polyribonucleotide nucleotidyltransferase 1	0.596304	0.0863848	0.208593
Plate11	P03	NM_007171	POMT1	protein-O-mannosyltransferase 1	0.596482	0.0442913	0.163976
Plate11	P04	NM_002703	PPAT	phosphoribosyl pyrophosphate amidotransferase	0.786573	0.201765	0.291174
Plate11	P05	NM_058179	PSAT1	phosphoserine aminotransferase 1	0.730217	0.15942	0.265299
Plate11	P06	NM_014298	QPRT	quinolinate phosphoribosyltransferase (nicotinate-nucleotide pyrophosphorylase (carboxylating))	0.775602	0.237641	0.314651
Plate11	P07	NM_003799	RNMT	RNA (guanine-7-) methyltransferase	0.521828	0.0118005	0.106785
Plate11	P08	NM_133491	SAT2	spermidine/spermine N1-acetyltransferase 2	0.584236	0.0572675	0.179306
Plate11	P09	NM_005412	SHMT2	serine hydroxymethyltransferase 2 (mitochondrial)	0.688403	0.119889	0.237199
Plate11	P10	NM_006100	SIAT10	ST3 beta-galactoside alpha-2,3-sialyltransferase 6	0.643017	0.107936	0.228893
Plate11	P11	NM_006927	SIAT4B	ST3 beta-galactoside alpha-2,3-sialyltransferase 2	0.654871	0.152165	0.26045
Plate11	P12	NM_174971	SIAT6	ST3 beta-galactoside alpha-2,3-sialyltransferase 3	0.598264	0.0461521	0.165751
Plate11	P13	NM_006456	SIAT7B	ST6 (alpha-N-acetyl-neuraminyl-2,3-beta-galactosyl-1,3)-N-acetylgalactosaminide alpha-2,6-sialyltransferase 2	0.607918	0.109597	0.229418
Plate11	P14	NM_014403	SIAT7D	ST6 (alpha-N-acetyl-neuraminyl-2,3-beta-galactosyl-1,3)-N-acetylgalactosaminide alpha-2,6-sialyltransferase 4	0.72607	0.194288	0.286603
Plate11	P15	NM_013443	SIAT7F	ST6 (alpha-N-acetyl-neuraminyl-2,3-beta-galactosyl-1,3)-N-acetylgalactosaminide alpha-2,6-sialyltransferase 6	0.793614	0.291518	0.35089
Plate11	P16	NM_006011	SIAT8B	ST8 alpha-N-acetyl-neuraminide alpha-2,8-sialyltransferase 2	0.891965	0.350265	0.390283
Plate11	P17	NM_005668	SIAT8D	ST8 alpha-N-acetyl-neuraminide alpha-2,8-sialyltransferase 4	0.882092	0.36994	0.404931
Plate11	P18	NM_003896	SIAT9	ST3 beta-galactoside alpha-2,3-sialyltransferase 5	0.720145	0.187391	0.281775
Plate11	P19	NM_003101	SOAT1	sterol O-acyltransferase (acyl-Coenzyme A: cholesterol acyltransferase) 1	0.762451	0.185796	0.28137
Plate11	P20	NM_178324	SPTLC1	serine palmitoyltransferase, long chain base subunit 1	0.915134	0.40315	0.428701
Plate11	P21	NM_032528	ST6GalII	ST6 beta-galactosamide alpha-2,6-sialyltranferase 2	0.80444	0.290335	0.349694
Plate11	P22	NM_177528	SULT1A2	sulfotransferase family, cytosolic, 1A, phenol-preferring, member 2	0.865183	0.305752	0.360169
Plate12	A01	NM_177552	SULT1A3	sulfotransferase family, cytosolic, 1A, phenol-preferring, member 3	0.57701	0.000668022	0.0695751
Plate12	A02	NM_001056	SULT1C1	sulfotransferase family, cytosolic, 1C, member 1	0.604917	0.00173367	0.0797486
Plate12	A03	NM_005420	SULT1E1	sulfotransferase family 1E, estrogen-preferring, member 1	0.758493	0.0141245	0.109968
Plate12	A04	NM_177973	SULT2B1	sulfotransferase family, cytosolic, 2B, member 1	0.705529	0.0112398	0.105696
Plate12	A05	NM_000353	TAT	tyrosine aminotransferase	0.615731	0.00207679	0.080167
Plate12	A06	NM_198951	TGM2	transglutaminase 2 (C polypeptide, protein-glutamine-gamma-glutamyltransferase)	0.601759	0.000968371	0.0685309
Plate12	A07	NM_198994	TGM6	transglutaminase 6	0.679439	0.121185	0.237973
Plate12	A08	NM_014317	TPRT	trans-prenyltransferase	0.685356	0.00510609	0.0854109
Plate12	A09	NM_003595	TPST2	tyrosylprotein sulfotransferase 2	0.645769	0.00634422	0.0897951
Plate12	A10	NM_182916	TRNT1	tRNA nucleotidyl transferase, CCA-adding, 1	0.660781	0.0981258	0.219293
Plate12	A11	NM_003358	UGCG	UDP-glucose ceramide glucosyltransferase	0.755227	0.167658	0.270843
Plate12	A12	NM_000463	UGT1A1	UDP glycosyltransferase 1 family, polypeptide A1	0.754679	0.0504619	0.170994
Plate12	A13	NM_019093	UGT1A3	UDP glycosyltransferase 1 family, polypeptide A3	0.766596	0.00346118	0.0806149
Plate12	A14	NM_001072	UGT1A6	UDP glycosyltransferase 1 family, polypeptide A6	0.784524	0.00269248	0.081662
Plate12	A15	NM_019076	UGT1A8	UDP glycosyltransferase 1 family, polypeptide A8	0.72635	0.000271558	0.0624584
Plate12	A16	NM_006798	UGT2A1	UDP glycosyltransferase 2 family, polypeptide A1	0.710004	0.0329748	0.149198
Plate12	A17	NM_001073	UGT2B11	UDP glycosyltransferase 2 family, polypeptide B11	0.718782	0.202618	0.291947
Plate12	A18	NM_001077	UGT2B17	UDP glycosyltransferase 2 family, polypeptide B17	0.779884	0.000317883	0.0584905
Plate12	A19	NM_021139	UGT2B4	UDP glycosyltransferase 2 family, polypeptide B4	0.79732	0.0677018	0.190282
Plate12	A20	NM_003360	UGT8	UDP glycosyltransferase 8 (UDP-galactose ceramide galactosyltransferase)	0.736275	0.025993	0.13626
Plate12	A21	NM_005715	UST	uronyl-2-sulfotransferase	0.810788	0.00171538	0.0802449
Plate12	A22	NM_022167	XYLT2	xylosyltransferase II	0.811278	0.293835	0.352602
Plate12	B01	NM_014465	SULT1B1	sulfotransferase family, cytosolic, 1B, member 1	0.552147	0.0173686	0.118951
Plate12	B02	NM_006588	SULT1C2	sulfotransferase family, cytosolic, 1C, member 2	0.742589	0.0773658	0.200121
Plate12	B03	NM_003167	SULT2A1	sulfotransferase family, cytosolic, 2A, dehydroepiandrosterone (DHEA)-preferring, member 1	0.713023	0.177666	0.278138
Plate12	B04	NM_176874	SULT4A1	sulfotransferase family 4A, member 1	0.724858	0.134276	0.248393
Plate12	B05	NM_000359	TGM1	transglutaminase 1 (K polypeptide epidermal type I, protein-glutamine-gamma-glutamyltransferase)	0.81301	0.226851	0.307595
Plate12	B06	NM_003245	TGM3	transglutaminase 3 (E polypeptide, protein-glutamine-gamma-glutamyltransferase)	0.705022	0.0649493	0.186632
Plate12	B07	NM_000367	TPMT	thiopurine S-methyltransferase	0.660931	0.090547	0.211698
Plate12	B08	NM_003596	TPST1	tyrosylprotein sulfotransferase 1	0.709977	0.114542	0.233397
Plate12	B09	NM_017646	TRIT1	tRNA isopentenyltransferase 1	0.837154	0.118675	0.23692
Plate12	B10	NM_003312	TST	thiosulfate sulfurtransferase (rhodanese)	0.906615	0.421513	0.442517
Plate12	B11	NM_020121	UGCGL2	UDP-glucose ceramide glucosyltransferase-like 2	0.878798	0.236591	0.313863
Plate12	B12	NM_019075	UGT1A10	UDP glycosyltransferase 1 family, polypeptide A10	0.783708	0.153908	0.261568
Plate12	B13	NM_007120	UGT1A4	UDP glycosyltransferase 1 family, polypeptide A4	0.920794	0.412896	0.436793
Plate12	B14	NM_019077	UGT1A7	UDP glycosyltransferase 1 family, polypeptide A7	0.8475	0.209379	0.297114
Plate12	B15	NM_021027	UGT1A9	UDP glycosyltransferase 1 family, polypeptide A9	0.816001	0.262276	0.330389
Plate12	B16	NM_001075	UGT2B10	UDP glycosyltransferase 2 family, polypeptide B10	0.748474	0.150534	0.259347
Plate12	B17	NM_001076	UGT2B15	UDP glycosyltransferase 2 family, polypeptide B15	0.788431	0.175992	0.27709
Plate12	B18	NM_053039	UGT2B28	UDP glycosyltransferase 2 family, polypeptide B28	0.77779	0.209633	0.297322
Plate12	B19	NM_001074	UGT2B7	UDP glycosyltransferase 2 family, polypeptide B7	0.777311	0.316284	0.366475
Plate12	B20	NM_000373	UMPS	uridine monophosphate synthetase (orotate phosphoribosyl transferase and orotidine-5-decarboxylase)	0.750987	0.190191	0.283667
Plate12	B21	NM_022166	XYLT1	xylosyltransferase I	1.06323	0.375076	0.408286
Plate12	B22	NM_001093	ACACB	acetyl-Coenzyme A carboxylase beta	0.845015	0.180964	0.279575
Plate12	C01	NM_198830	ACLY	ATP citrate lyase	0.742277	0.0210819	0.127322
Plate12	C02	NM_003659	AGPS	alkylglycerone phosphate synthase	0.90029	0.327437	0.374214
Plate12	C03	NM_000032	ALAS2	aminolevulinate, delta-, synthase 2 (sideroblastic/hypochromic anemia)	0.815777	0.0433888	0.163374
Plate12	C04	NM_033254	BOC	BOC	0.879782	0.0599646	0.182774
Plate12	C05	NM_017444	CHRAC1	chromatin accessibility complex 1	0.771943	0.143879	0.255209
Plate12	C06	NM_144589	COMTD1	catechol-O-methyltransferase domain containing 1	0.810665	0.046522	0.165892
Plate12	C07	NM_004077	CS	citrate synthase	0.782249	0.00781648	0.0960957
Plate12	C08	NM_024917	CXorf34	chromosome X open reading frame 34	0.673285	0.00949735	0.100432
Plate12	C09	NM_014033	DKFZP586A0522	DKFZP586A0522	0.870577	0.00968675	0.101271
Plate12	C10	NM_001953	ECGF1	endothelial cell growth factor 1 (platelet-derived)	0.829848	0.165756	0.269903
Plate12	C11	NM_022821	ELOVL1	elongation of very long chain fatty acids (FEN1/Elo2, SUR4/Elo3, yeast)-like 1	0.789968	0.0388058	0.157275
Plate12	C12	NM_152310	ELOVL3	elongation of very long chain fatty acids (FEN1/Elo2, SUR4/Elo3, yeast)-like 3	0.807957	0.052221	0.172818
Plate12	C13	NM_024090	ELOVL6	ELOVL family member 6, elongation of long chain fatty acids (FEN1/Elo2, SUR4/Elo3-like, yeast)	0.805751	0.0113629	0.10613
Plate12	C14	NM_000127	EXT1	exostoses (multiple) 1	0.915616	0.140538	0.252695
Plate12	C15	NM_004455	EXTL1	exostoses (multiple)-like 1	0.787266	0.240525	0.316496
Plate12	C16	NM_001440	EXTL3	exostoses (multiple)-like 3	0.827062	0.0617178	0.184452
Plate12	C17	NM_017722	FLJ20244	FLJ20244	0.846727	0.00197669	0.0826617
Plate12	C18	NM_152404	FLJ34658	FLJ34658	0.792293	0.137678	0.25082
Plate12	C19	NM_152307	FLJ40452	chromosome 14 open reading frame 172	0.831277	0.0846568	0.206772
Plate12	C20	NM_002056	GFPT1	glutamine-fructose-6-phosphate transaminase 1	0.769249	0.156505	0.263468
Plate12	C21	NM_004837	GGPS1	geranylgeranyl diphosphate synthase 1	0.87234	0.226194	0.307156
Plate12	C22	NM_003875	GMPS	guanine monphosphate synthetase	0.843306	0.215599	0.300532
Plate12	D01	NM_014064	AD-003	AD-003	0.672679	0.00625675	0.0894747
Plate12	D02	NM_000688	ALAS1	aminolevulinate, delta-, synthase 1	0.860983	0.025708	0.13645
Plate12	D03	NM_020682	AS3MT	arsenic (+3 oxidation state) methyltransferase	0.710278	0.00663041	0.0914996
Plate12	D04	NM_032160	C18orf4	chromosome 18 open reading frame 4	0.790734	0.00244595	0.0803668
Plate12	D05	NM_018686	CMAS	cytidine monophosphate N-acetylneuraminic acid synthetase	0.892828	0.041976	0.160908
Plate12	D06	NM_004380	CREBBP	CREB binding protein (Rubinstein-Taybi syndrome)	0.62623	0.0510638	0.171769
Plate12	D07	NM_177926	CSRP2BP	CSRP2 binding protein	0.770237	0.00942666	0.100068
Plate12	D08	NM_032136	DKFZP434L1717	DKFZP434L1717	0.780528	0.131497	0.246808
Plate12	D09	NM_021071	DO	Dombrock blood group	0.806054	0.00789638	0.0964337
Plate12	D10	NM_020365	EIF2B3	eukaryotic translation initiation factor 2B, subunit 3 gamma, 58kDa	0.83745	0.0106164	0.103538
Plate12	D11	NM_017770	ELOVL2	elongation of very long chain fatty acids (FEN1/Elo2, SUR4/Elo3, yeast)-like 2	0.869242	0.00479939	0.0862952
Plate12	D12	NM_021814	ELOVL5	ELOVL family member 5, elongation of long chain fatty acids (FEN1/Elo2, SUR4/Elo3-like, yeast)	0.761741	0.0240429	0.134193
Plate12	D13	NM_001429	EP300	E1A binding protein p300	0.852492	0.183325	0.280398
Plate12	D14	NM_207122	EXT2	exostoses (multiple) 2	0.722232	0.0342001	0.151391
Plate12	D15	NM_001439	EXTL2	exostoses (multiple)-like 2	0.820553	0.0487268	0.16874
Plate12	D16	NM_000129	F13A1	coagulation factor XIII, A1 polypeptide	0.801527	0.0269979	0.138373
Plate12	D17	NM_017910	FLJ20628	FLJ20628	0.709034	0.00269535	0.0813022
Plate12	D18	NM_178557	FLJ37478	FLJ37478	0.846359	0.212585	0.29882
Plate12	D19	NM_021078	GCN5L2	GCN5 general control of amino-acid synthesis 5-like 2 (yeast)	0.838057	0.0532433	0.173907
Plate12	D20	NM_005110	GFPT2	glutamine-fructose-6-phosphate transaminase 2	0.881976	0.0862072	0.208529
Plate12	D21	NM_021971	GMPPB	GDP-mannose pyrophosphorylase B	0.944725	0.321492	0.370102
Plate12	D22	NM_004130	GYG	glycogenin	0.832656	0.0451864	0.164857
Plate12	E01	NM_003918	GYG2	glycogenin 2	0.603714	0.011583	0.10621
Plate12	E02	NM_021957	GYS2	glycogen synthase 2 (liver)	0.731178	0.066075	0.188007
Plate12	E03	NM_005328	HAS2	hyaluronan synthase 2	0.803848	0.143793	0.255221
Plate12	E04	NM_016173	HEMK1	HemK methyltransferase family member 1	0.786265	0.0134733	0.110019
Plate12	E05	NM_005518	HMGCS2	3-hydroxy-3-methylglutaryl-Coenzyme A synthase 2 (mitochondrial)	0.611468	0.0268483	0.13812
Plate12	E06	NM_004515	ILF2	interleukin enhancer binding factor 2, 45kDa	0.805305	0.00506976	0.0853204
Plate12	E07	NM_001564	ING1L	inhibitor of growth family, member 2	0.758259	0.00493066	0.0853206
Plate12	E08	NM_194451	LIAS	lipoic acid synthetase	0.740622	0.019998	0.124874
Plate12	E09	NM_138364	LOC90826	LOC90826	0.664331	0.0503945	0.171186
Plate12	E10	NM_145867	LTC4S	leukotriene C4 synthase	0.847682	0.165627	0.269933
Plate12	E11	NM_002405	MFNG	manic fringe homolog (Drosophila)	0.757019	0.00563192	0.0880686
Plate12	E12	NM_152637	MGC17301	MGC17301	0.911654	0.0182608	0.120718
Plate12	E13	NM_002451	MTAP	methylthioadenosine phosphorylase	0.706565	0.00523708	0.0855287
Plate12	E14	NM_007067	MYST2	MYST histone acetyltransferase 2	0.831004	0.1235	0.240043
Plate12	E15	NM_004535	MYT1	myelin transcription factor 1	0.683469	0.00164785	0.0790968
Plate12	E16	NM_000270	NP	nucleoside phosphorylase	0.88487	0.0312726	0.147669
Plate12	E17	NM_016816	OAS1	2,5-oligoadenylate synthetase 1, 40/46kDa	0.84755	0.0828892	0.205179
Plate12	E18	NM_006187	OAS3	2-5-oligoadenylate synthetase 3, 100kDa	0.859823	0.00756043	0.0959392
Plate12	E19	NM_003884	PCAF	p300/CBP-associated factor	0.884558	0.0048084	0.0858977
Plate12	E20	NM_024419	PGS1	PGS1	0.745751	0.247564	0.321996
Plate12	E21	NM_153747	PIGC	phosphatidylinositol glycan, class C	0.972853	0.443571	0.458351
Plate12	E22	NM_005482	PIGK	phosphatidylinositol glycan, class K	0.795339	0.0703256	0.192367
Plate12	F01	NM_002103	GYS1	glycogen synthase 1 (muscle)	0.640761	0.00102965	0.0710457
Plate12	F02	NM_001523	HAS1	hyaluronan synthase 1	0.648901	0.0743971	0.1964
Plate12	F03	NM_005329	HAS3	hyaluronan synthase 3	0.772487	0.104426	0.225433
Plate12	F04	NM_002130	HMGCS1	3-hydroxy-3-methylglutaryl-Coenzyme A synthase 1 (soluble)	0.78848	0.0875335	0.209625
Plate12	F05	NM_022727	HTF9C	HTF9C	0.803212	0.0392723	0.157775
Plate12	F06	NM_198217	ING1	inhibitor of growth family, member 1	0.79948	0.0280805	0.140785
Plate12	F07	NM_020378	KLP1	KLP1	0.612694	0.00177882	0.0804841
Plate12	F08	NM_052937	LOC115294	LOC115294	0.657659	0.019758	0.124219
Plate12	F09	NM_173469	LOC92912	LOC92912	0.880944	0.124277	0.240705
Plate12	F10	NM_022132	MCCC2	methylcrotonoyl-Coenzyme A carboxylase 2 (beta)	0.732993	0.0839658	0.205813
Plate12	F11	NM_153373	MGC15875	MGC15875	0.788781	0.0339175	0.150866
Plate12	F12	NM_032331	MGC2408	MGC2408	0.889924	0.00059316	0.072761
Plate12	F13	NM_032188	MYST1	MYST histone acetyltransferase 1	0.811039	0.0101782	0.10366
Plate12	F14	NM_012330	MYST4	MYST histone acetyltransferase (monocytic leukemia) 4	0.654295	0.0403303	0.159472
Plate12	F15	NM_012191	NAT6	N-acetyltransferase 6	0.840099	0.0530504	0.173688
Plate12	F16	NM_182543	NSUN6	NOL1/NOP2/Sun domain family, member 6	0.873897	0.233266	0.311623
Plate12	F17	NM_002535	OAS2	2-5-oligoadenylate synthetase 2, 69/71kDa	0.837453	0.0232116	0.131819
Plate12	F18	NM_198213	OASL	2-5-oligoadenylate synthetase-like	0.782648	0.00547315	0.0868154
Plate12	F19	NM_000532	PCCB	propionyl Coenzyme A carboxylase, beta polypeptide	0.88341	0.0244239	0.134283
Plate12	F20	NM_020472	PIGA	phosphatidylinositol glycan, class A (paroxysmal nocturnal hemoglobinuria)	0.812372	0.0650616	0.186663
Plate12	F21	NM_004569	PIGH	phosphatidylinositol glycan, class H	0.842591	0.0128369	0.108848
Plate12	F22	NM_004278	PIGL	phosphatidylinositol glycan, class L	0.742102	0.1486	0.257946
Plate12	G01	NM_148920	PIGQ	phosphatidylinositol glycan, class Q	0.79864	0.271374	0.336475
Plate12	G02	NM_016937	POLA	polymerase (DNA directed), alpha	0.8399	0.287492	0.347712
Plate12	G03	NM_002691	POLD1	polymerase (DNA directed), delta 1, catalytic subunit 125kDa	0.646311	0.0396336	0.15842
Plate12	G04	NM_021173	POLD4	polymerase (DNA-directed), delta 4	0.847088	0.0150449	0.112379
Plate12	G05	NM_017443	POLE3	polymerase (DNA directed), epsilon 3 (p17 subunit)	0.805455	0.19965	0.289942
Plate12	G06	NM_002693	POLG	polymerase (DNA directed), gamma	0.869025	0.200797	0.290613
Plate12	G07	NM_013274	POLL	polymerase (DNA directed), lambda	0.92218	0.0594188	0.18242
Plate12	G08	NM_006596	POLQ	polymerase (DNA directed), theta	0.834662	0.052084	0.172468
Plate12	G09	NM_004875	POLR1C	polymerase (RNA) I polypeptide C, 30kDa	0.848504	0.0459902	0.165926
Plate12	G10	NM_000937	POLR2A	polymerase (RNA) II (DNA directed) polypeptide A, 220kDa	0.727832	0.268541	0.334842
Plate12	G11	NM_002694	POLR2C	polymerase (RNA) II (DNA directed) polypeptide C, 33kDa	0.93201	0.389165	0.417367
Plate12	G12	NM_002695	POLR2E	polymerase (RNA) II (DNA directed) polypeptide E, 25kDa	0.801624	0.306503	0.360592
Plate12	G13	NM_006232	POLR2H	polymerase (RNA) II (DNA directed) polypeptide H	0.886214	0.168002	0.271241
Plate12	G14	NM_006234	POLR2J	polymerase (RNA) II (DNA directed) polypeptide J, 13.3kDa	0.885205	0.101451	0.221875
Plate12	G15	NM_021128	POLR2L	polymerase (RNA) II (DNA directed) polypeptide L, 7.6kDa	0.745989	0.00286855	0.0783881
Plate12	G16	NM_005035	POLRMT	polymerase (RNA) mitochondrial (DNA directed)	0.881624	0.00937003	0.0998505
Plate12	G17	NM_000947	PRIM2A	primase, polypeptide 2A, 58kDa	0.814468	0.0802022	0.202616
Plate12	G18	NM_175886	PRPS1L1	phosphoribosyl pyrophosphate synthetase 1-like 1	1.10277	0.259245	0.329125
Plate12	G19	NM_002767	PRPSAP2	phosphoribosyl pyrophosphate synthetase-associated protein 2	0.872948	0.0792087	0.202329
Plate12	G20	NM_030783	PTDSS2	phosphatidylserine synthase 2	0.858018	0.0668661	0.189185
Plate12	G21	NM_002863	PYGL	phosphorylase, glycogen; liver (Hers disease, glycogen storage disease type VI)	0.925768	0.305613	0.360159
Plate12	G22	NM_018292	QRSL1	glutaminyl-tRNA synthase (glutamine-hydrolyzing)-like 1	0.732735	0.0697581	0.192629
Plate12	H01	NM_012388	PLDN	pallidin homolog (mouse)	0.825553	0.000631272	0.0725963
Plate12	H02	NM_002690	POLB	polymerase (DNA directed), beta	0.852021	0.159696	0.265518
Plate12	H03	NM_006230	POLD2	polymerase (DNA directed), delta 2, regulatory subunit 50kDa	0.796189	0.0925201	0.213776
Plate12	H04	NM_006231	POLE	polymerase (DNA directed), epsilon	0.927585	0.333062	0.378604
Plate12	H05	NM_019896	POLE4	polymerase (DNA-directed), epsilon 4 (p12 subunit)	0.773998	0.00247263	0.0802879
Plate12	H06	NM_016218	POLK	polymerase (DNA directed) kappa	0.794063	0.0103077	0.103641
Plate12	H07	NM_013284	POLM	polymerase (DNA directed), mu	0.906287	0.0634245	0.185338
Plate12	H08	NM_015425	POLR1A	polymerase (RNA) I polypeptide A, 194kDa	0.85857	0.0520671	0.172619
Plate12	H09	NM_015972	POLR1D	polymerase (RNA) I polypeptide D, 16kDa	0.828166	0.0838699	0.205669
Plate12	H10	NM_000938	POLR2B	polymerase (RNA) II (DNA directed) polypeptide B, 140kDa	0.86951	0.147628	0.257801
Plate12	H11	NM_004805	POLR2D	polymerase (RNA) II (DNA directed) polypeptide D	0.919426	0.314212	0.365532
Plate12	H12	NM_002696	POLR2G	polymerase (RNA) II (DNA directed) polypeptide G	0.75838	0.223924	0.306108
Plate12	H13	NM_006233	POLR2I	polymerase (RNA) II (DNA directed) polypeptide I, 14.5kDa	0.844631	0.121559	0.238284
Plate12	H14	NM_005034	POLR2K	polymerase (RNA) II (DNA directed) polypeptide K, 7.0kDa	0.883758	0.230363	0.30992
Plate12	H15	NM_016310	POLR3K	polymerase (RNA) III (DNA directed) polypeptide K, 12.3 kDa	0.906854	0.0199036	0.124567
Plate12	H16	NM_000946	PRIM1	primase, polypeptide 1, 49kDa	0.878148	0.0983501	0.219439
Plate12	H17	NM_019023	PRMT7	PRMT7	0.811073	0.0105197	0.103694
Plate12	H18	NM_002766	PRPSAP1	phosphoribosyl pyrophosphate synthetase-associated protein 1	0.919951	0.298486	0.355402
Plate12	H19	NM_014754	PTDSS1	phosphatidylserine synthase 1	0.81171	0.0282815	0.140897
Plate12	H20	NM_002862	PYGB	phosphorylase, glycogen; brain	0.823701	0.0585963	0.181104
Plate12	H21	NM_005609	PYGM	phosphorylase, glycogen; muscle (McArdle syndrome, glycogen storage disease type V)	0.83445	0.0209432	0.127601
Plate12	H22	NM_016316	REV1L	REV1-like (yeast)	0.842195	0.0501353	0.170831
Plate12	I01	NM_002912	REV3L	REV3-like, catalytic subunit of DNA polymerase zeta (yeast)	0.762249	0.00117509	0.0712802
Plate12	I02	NM_181578	RFC5	replication factor C (activator 1) 5, 36.5kDa	0.607822	0.0015698	0.0780657
Plate12	I03	NM_002950	RPN1	ribophorin I	0.792055	0.0718981	0.194739
Plate12	I04	NM_002979	SCP2	sterol carrier protein 2	0.829533	0.17611	0.277038
Plate12	I05	NM_003132	SRM	spermidine synthase	0.89539	0.0226292	0.130799
Plate12	I06	NM_024670	SUV39H2	suppressor of variegation 3-9 homolog 2 (Drosophila)	0.815619	0.000728927	0.0693737
Plate12	I07	NM_181313	TAZ	tafazzin (cardiomyopathy, dilated 3A (X-linked); endocardial fibroelastosis 2; Barth syndrome)	0.793737	0.0470748	0.166786
Plate12	I08	NM_003241	TGM4	transglutaminase 4 (prostate)	0.915442	0.013334	0.110351
Plate12	I09	NM_052955	TGM7	transglutaminase 7	0.876957	0.0112842	0.105754
Plate12	I10	NM_012253	TKTL1	transketolase-like 1	0.898789	0.000789605	0.0670557
Plate12	I11	NM_025235	TNKS2	tankyrase, TRF1-interacting ankyrin-related ADP-ribose polymerase 2	0.775551	0.0720506	0.194579
Plate12	I12	NM_001071	TYMS	thymidylate synthetase	0.984967	0.456902	0.467835
Plate12	I13	NM_017582	UBE2Q	ubiquitin-conjugating enzyme E2Q (putative)	0.904582	0.00264258	0.0824126
Plate12	I14	NM_173355	UPP2	uridine phosphorylase 2	0.849566	0.00283972	0.0795697
Plate12	I15	NM_001126	ADSS	adenylosuccinate synthase	0.835916	0.0154146	0.113301
Plate12	I16	NM_006476	ATP5L	ATP synthase, H+ transporting, mitochondrial F0 complex, subunit g	0.813081	0.11748	0.236073
Plate12	I17	NM_001905	CTPS	CTP synthase	0.993161	0.479738	0.485544
Plate12	I18	NM_013407	DHPS	deoxyhypusine synthase	0.875947	0.020335	0.125981
Plate12	I19	NM_000190	HMBS	hydroxymethylbilane synthase	0.666297	0.0894019	0.210897
Plate12	I20	NM_000620	NOS1	nitric oxide synthase 1 (neuronal)	0.874999	0.186325	0.281554
Plate12	I21	NM_000281	PCBD	6-pyruvoyl-tetrahydropterin synthase/dimerization cofactor of hepatocyte nuclear factor 1 alpha (TCF1)	0.750963	0.192676	0.285446
Plate12	I22	NM_198797	PTGES	prostaglandin E synthase	0.906948	0.323227	0.371711
Plate12	J01	NM_181573	RFC4	replication factor C (activator 1) 4, 37kDa	0.6705	0.00122603	0.0683604
Plate12	J02	NM_007055	RPC155	polymerase (RNA) III (DNA directed) polypeptide A, 155kDa	0.950619	0.220165	0.303222
Plate12	J03	NM_002951	RPN2	ribophorin II	0.875597	0.0710663	0.193244
Plate12	J04	NM_006109	SKB1	SKB1 homolog (S. pombe)	0.755229	0.00117876	0.0699653
Plate12	J05	NM_003173	SUV39H1	suppressor of variegation 3-9 homolog 1 (Drosophila)	0.720692	0.054398	0.175191
Plate12	J06	NM_006755	TALDO1	transaldolase 1	0.837104	0.0356802	0.152796
Plate12	J07	NM_198255	TERT	telomerase reverse transcriptase	0.916721	0.294628	0.353016
Plate12	J08	NM_201631	TGM5	transglutaminase 5	0.783968	0.012109	0.10729
Plate12	J09	NM_001064	TKT	transketolase (Wernicke-Korsakoff syndrome)	0.802672	0.0826758	0.20511
Plate12	J10	NM_003747	TNKS	tankyrase, TRF1-interacting ankyrin-related ADP-ribose polymerase	0.907912	0.0559478	0.177082
Plate12	J11	NM_018718	TSGA14	testis specific, 14	0.953282	0.368522	0.40378
Plate12	J12	NM_003115	UAP1	UDP-N-acteylglucosamine pyrophosphorylase 1	0.788918	0.148566	0.257969
Plate12	J13	NM_181597	UPP1	uridine phosphorylase 1	0.797423	0.0430201	0.162429
Plate12	J14	NM_017528	WBSCR22	Williams Beuren syndrome chromosome region 22	0.960626	0.366258	0.402818
Plate12	J15	NM_199165	ADSSL1	adenylosuccinate synthase like 1	0.936074	0.307103	0.36099
Plate12	J16	NM_000071	CBS	cystathionine-beta-synthase	0.884557	0.132313	0.246912
Plate12	J17	NM_175859	CTPS2	CTP synthase II	0.901677	0.0478736	0.167466
Plate12	J18	NM_005333	HCCS	holocytochrome c synthase (cytochrome c heme-lyase)	0.848565	0.0338431	0.150778
Plate12	J19	NM_006844	ILVBL	ilvB (bacterial acetolactate synthase)-like	0.909908	0.367173	0.403182
Plate12	J20	NM_030769	NPL	N-acetylneuraminate pyruvate lyase (dihydrodipicolinate synthase)	0.823609	0.0367297	0.154298
Plate12	J21	NM_032592	PHACS	PHACS	0.913927	0.380947	0.411995
Plate12	J22	NM_000317	PTS	6-pyruvoyltetrahydropterin synthase	0.784817	0.0212084	0.127806
Plate12	K01	NM_001002019	PUS1	pseudouridylate synthase 1	0.57472	0.00171257	0.0807981
Plate12	K02	NM_139169	TRUB1	TruB pseudouridine (psi) synthase homolog 1 (E. coli)	0.94119	0.376764	0.409317
Plate12	K03	NM_139274	ACAS2	acetyl-Coenzyme A synthetase 2 (ADP forming)	0.773411	0.053961	0.174394
Plate12	K04	NM_024560	FLJ21963	FLJ21963	0.745116	0.15665	0.263631
Plate12	K05	NM_006452	PAICS	phosphoribosylaminoimidazole carboxylase, phosphoribosylaminoimidazole succinocarboxamide synthetase	0.767107	0.217901	0.301835
Plate12	K06	NM_023928	AACS	acetoacetyl-CoA synthetase	0.873453	0.00226189	0.0795265
Plate12	K07	NM_133436	ASNS	asparagine synthetase	0.836417	0.136925	0.250773
Plate12	K08	NM_052956	BUCS1	butyryl Coenzyme A synthetase 1	0.795221	0.0240124	0.134158
Plate12	K09	NM_001751	CARS	cysteinyl-tRNA synthetase	0.755596	0.0223595	0.130746
Plate12	K10	NM_001349	DARS	aspartyl-tRNA synthetase	0.864789	0.113076	0.232469
Plate12	K11	NM_006567	FARS1	phenylalanine-tRNA synthetase 2 (mitochondrial)	0.842478	0.247869	0.322089
Plate12	K12	NM_005687	FARSLB	phenylalanine-tRNA synthetase-like, beta subunit	0.832058	0.0167438	0.116699
Plate12	K13	NM_002047	GARS	glycyl-tRNA synthetase	0.877228	0.0632697	0.185573
Plate12	K14	NM_002109	HARS	histidyl-tRNA synthetase	0.788646	0.0145681	0.110766
Plate12	K15	NM_012208	HARSL	histidyl-tRNA synthetase-like	0.845224	0.0151933	0.112725
Plate12	K16	NM_013417	IARS	isoleucine-tRNA synthetase	0.786897	0.0153925	0.113289
Plate12	K17	NM_020117	LARS	leucyl-tRNA synthetase	0.919457	0.0476214	0.16722
Plate12	K18	NM_004990	MARS	methionine-tRNA synthetase	0.901397	0.0254791	0.136548
Plate12	K19	NM_018161	NADSYN1	NADSYN1	0.8693	0.0741496	0.19631
Plate12	K20	NM_201398	PP591	PP591	0.841509	0.0638883	0.186004
Plate12	K21	NM_005051	QARS	glutaminyl-tRNA synthetase	0.828915	0.0215806	0.128923
Plate12	K22	NM_020320	RARSL	arginyl-tRNA synthetase-like	0.816207	0.0796345	0.202573
Plate12	L01	NM_004595	SMS	spermine synthase	0.759397	0.312779	0.36448
Plate12	L02	NM_000375	UROS	uroporphyrinogen III synthase (congenital erythropoietic porphyria)	0.778006	0.0396278	0.158511
Plate12	L03	NM_032501	ACAS2L	acetyl-Coenzyme A synthetase 2 (AMP forming)-like	0.682153	0.0719379	0.194655
Plate12	L04	NM_005339	HIP2	huntingtin interacting protein 2	0.780878	0.012106	0.107436
Plate12	L05	NM_031307	PUS3	pseudouridylate synthase 3	0.897404	0.0188376	0.122046
Plate12	L06	NM_001605	AARS	alanyl-tRNA synthetase	0.869059	0.00270518	0.0807167
Plate12	L07	NM_000050	ASS	argininosuccinate synthetase	0.783168	0.0875615	0.20951
Plate12	L08	NM_004341	CAD	carbamoyl-phosphate synthetase 2, aspartate transcarbamylase, and dihydroorotase	0.824175	0.0279642	0.14033
Plate12	L09	NM_001875	CPS1	carbamoyl-phosphate synthetase 1, mitochondrial	0.743581	0.226062	0.30728
Plate12	L10	NM_004446	EPRS	glutamyl-prolyl-tRNA synthetase	0.956921	0.298833	0.355662
Plate12	L11	NM_004461	FARSLA	phenylalanine-tRNA synthetase-like, alpha subunit	0.816769	0.0959263	0.21737
Plate12	L12	NM_018060	FLJ10326	isoleucine-tRNA synthetase 2, mitochondrial	0.646831	0.0338063	0.150857
Plate12	L13	NM_000178	GSS	glutathione synthetase	0.786936	0.0104138	0.103762
Plate12	L14	NM_080820	HARS2	histidyl-tRNA synthetase 2	0.876892	0.200997	0.290521
Plate12	L15	NM_000411	HLCS	holocarboxylase synthetase (biotin-[proprionyl-Coenzyme A-carboxylase (ATP-hydrolysing)] ligase)	0.936405	0.417766	0.440089
Plate12	L16	NM_005548	KARS	lysyl-tRNA synthetase	0.78758	0.0680397	0.190649
Plate12	L17	NM_015340	LARS2	leucyl-tRNA synthetase 2, mitochondrial	0.775052	0.0392405	0.157877
Plate12	L18	NM_006441	MTHFS	5,10-methenyltetrahydrofolate synthetase (5-formyltetrahydrofolate cyclo-ligase)	0.919785	0.00436606	0.0857674
Plate12	L19	NM_004539	NARS	asparaginyl-tRNA synthetase	0.836218	0.00576861	0.0872404
Plate12	L20	NM_007198	PROSC	proline synthetase co-transcribed homolog (bacterial)	0.960067	0.424259	0.44447
Plate12	L21	NM_002887	RARS	arginyl-tRNA synthetase	0.837686	0.304479	0.359359
Plate12	L22	NM_006513	SARS	seryl-tRNA synthetase	0.89651	0.338511	0.381577
Plate12	M01	NM_017827	SARS2	seryl-tRNA synthetase 2	0.663706	0.00750419	0.095445
Plate12	M02	NM_006295	VARS2	valyl-tRNA synthetase 2	0.74792	0.0604555	0.183662
Plate12	M03	NM_201263	WARS2	tryptophanyl tRNA synthetase 2 (mitochondrial)	0.87055	0.215366	0.300511
Plate12	M04	NM_015936	CGI-04	tyrosyl-tRNA synthetase 2 (mitochondrial)	0.807259	0.300989	0.356996
Plate12	M05	NM_007215	POLG2	polymerase (DNA directed), gamma 2, accessory subunit	0.858703	0.196737	0.288136
Plate12	M06	NM_003849	SUCLG1	succinate-CoA ligase, GDP-forming, alpha subunit	0.810594	0.0273938	0.138983
Plate12	M07	NM_005168	ARHE	Rho family GTPase 3	0.846236	0.00635264	0.0896844
Plate12	M08	NM_005440	ARHN	Rho family GTPase 2	0.757139	0.0408397	0.160338
Plate12	M09	NM_017594	DIRAS2	DIRAS family, GTP-binding RAS-like 2	0.714146	0.00190417	0.0814807
Plate12	M10	NM_033360	KRAS2	v-Ki-ras2 Kirsten rat sarcoma viral oncogene homolog	0.82959	0.0193311	0.123791
Plate12	M11	NM_002524	NRAS	neuroblastoma RAS viral (v-ras) oncogene homolog	0.781835	0.0973423	0.218693
Plate12	M12	NM_004663	RAB11A	RAB11A, member RAS oncogene family	0.771994	0.01438	0.1104
Plate12	M13	NM_002870	RAB13	RAB13, member RAS oncogene family	0.758798	0.0288942	0.14279
Plate12	M14	NM_021252	RAB18	RAB18, member RAS oncogene family	0.790441	0.00303271	0.0775027
Plate12	M15	NM_030981	RAB1B	RAB1B, member RAS oncogene family	0.832245	0.0749404	0.196986
Plate12	M16	NM_017817	RAB20	RAB20, member RAS oncogene family	0.817814	0.0422288	0.161317
Plate12	M17	NM_183227	RAB23	RAB23, member RAS oncogene family	0.900119	0.258337	0.328728
Plate12	M18	NM_020387	RAB25	RAB25, member RAS oncogene family	0.720571	0.00491425	0.0853039
Plate12	M19	NM_004163	RAB27B	RAB27B, member RAS oncogene family	0.933888	0.308976	0.362266
Plate12	M20	NM_032846	RAB2B	RAB2B, member RAS oncogene family	0.682579	0.0456172	0.165228
Plate12	M21	NM_006868	RAB31	RAB31, member RAS oncogene family	0.760206	0.0325519	0.148379
Plate12	M22	NM_004794	RAB33A	RAB33A, member RAS oncogene family	0.74502	0.0360949	0.152912
Plate12	N01	NM_152295	TARS	threonyl-tRNA synthetase	0.905182	0.0725723	0.195034
Plate12	N02	NM_173701	WARS	tryptophanyl-tRNA synthetase	0.848814	0.217931	0.301801
Plate12	N03	NM_003680	YARS	tyrosyl-tRNA synthetase	0.790026	0.0241376	0.13445
Plate12	N04	NM_178822	IGSF10	immunoglobulin superfamily, member 10	0.776722	0.149122	0.258529
Plate12	N05	NM_003850	SUCLA2	succinate-CoA ligase, ADP-forming, beta subunit	0.8209	0.0220308	0.129925
Plate12	N06	NM_003848	SUCLG2	succinate-CoA ligase, GDP-forming, beta subunit	0.788071	0.0243831	0.134326
Plate12	N07	NM_004675	ARHI	DIRAS family, GTP-binding RAS-like 3	0.694719	0.0017156	0.0795809
Plate12	N08	NM_145173	DIRAS1	DIRAS family, GTP-binding RAS-like 1	0.85061	0.0451226	0.164952
Plate12	N09	NM_176795	HRAS	v-Ha-ras Harvey rat sarcoma viral oncogene homolog	1.05731	0.435973	0.452448
Plate12	N10	NM_012219	MRAS	muscle RAS oncogene homolog	0.801035	0.184254	0.280884
Plate12	N11	NM_016131	RAB10	RAB10, member RAS oncogene family	0.712004	0.0752725	0.197389
Plate12	N12	NM_004218	RAB11B	RAB11B, member RAS oncogene family	0.819298	0.0732921	0.195729
Plate12	N13	NM_022449	RAB17	RAB17, member RAS oncogene family	0.774334	0.069816	0.1925
Plate12	N14	NM_004161	RAB1A	RAB1A, member RAS oncogene family	0.815758	0.0793979	0.202437
Plate12	N15	NM_002865	RAB2	RAB2, member RAS oncogene family	0.859637	0.125282	0.241212
Plate12	N16	NM_014999	RAB21	RAB21, member RAS oncogene family	0.801055	0.0227404	0.131167
Plate12	N17	NM_130781	RAB24	RAB24, member RAS oncogene family	0.843281	0.0899658	0.211234
Plate12	N18	NM_183236	RAB27A	RAB27A, member RAS oncogene family	0.805513	0.0972736	0.218628
Plate12	N19	NM_004249	RAB28	RAB28, member RAS oncogene family	0.794096	0.0243394	0.134354
Plate12	N20	NM_014488	RAB30	RAB30, member RAS oncogene family	0.918011	0.138621	0.251293
Plate12	N21	NM_006834	RAB32	RAB32, member RAS oncogene family	0.880573	0.00334589	0.0799537
Plate12	N22	NM_031296	RAB33B	RAB33B, member RAS oncogene family	0.778763	0.19923	0.289636
Plate12	O01	NM_031934	RAB34	RAB34, member RAS oncogene family	0.684691	0.0204471	0.126251
Plate12	O02	NM_004914	RAB36	RAB36, member RAS oncogene family	0.792429	0.00503031	0.0849153
Plate12	O03	NM_022337	RAB38	RAB38, member RAS oncogene family	0.821965	0.0514319	0.172691
Plate12	O04	NM_080879	RAB40A	RAB40A, member RAS oncogene family	0.704373	0.0597791	0.182714
Plate12	O05	NM_021168	RAB40C	RAB40C, member RAS oncogene family	0.888788	0.338731	0.381747
Plate12	O06	NM_002868	RAB5B	RAB5B, member RAS oncogene family	0.795034	0.0293749	0.143877
Plate12	O07	NM_198896	RAB6A	RAB6A, member RAS oncogene family	0.654534	0.0869419	0.208933
Plate12	O08	NM_032144	RAB6C	RAB6C, member RAS oncogene family	0.824256	0.0442362	0.163992
Plate12	O09	NM_004251	RAB9A	RAB9A, member RAS oncogene family	0.678093	0.0640603	0.186308
Plate12	O10	NM_007081	RABL2B	RAB, member of RAS oncogene family-like 2B	0.808501	0.0782231	0.201114
Plate12	O11	NM_198829	RAC1	ras-related C3 botulinum toxin substrate 1 (rho family, small GTP binding protein Rac1)	0.722257	0.125732	0.241741
Plate12	O12	NM_005052	RAC3	ras-related C3 botulinum toxin substrate 3 (rho family, small GTP binding protein Rac3)	0.838018	0.105695	0.226841
Plate12	O13	NM_002881	RALB	v-ral simian leukemia viral oncogene homolog B (ras related; GTP binding protein)	0.797866	0.287666	0.347846
Plate12	O14	NM_002884	RAP1A	RAP1A, member of RAS oncogene family	0.879518	0.185599	0.281381
Plate12	O15	NM_021033	RAP2A	RAP2A, member of RAS oncogene family	0.870143	0.28775	0.347795
Plate12	O16	NM_021183	RAP2C	RAP2C, member of RAS oncogene family	0.872133	0.0537189	0.174428
Plate12	O17	NM_006506	RASA2	RAS p21 protein activator 2	0.856576	0.168726	0.272012
Plate12	O18	NM_006989	RASA4	RAS p21 protein activator 4	0.897323	0.244458	0.319387
Plate12	O19	NM_170692	RASAL2	RAS protein activator like 2	0.943829	0.331948	0.377882
Plate12	O20	NM_014310	RASD2	RASD family, member 2	0.914536	0.151842	0.2603
Plate12	O21	NM_006909	RASGRF2	Ras protein-specific guanine nucleotide-releasing factor 2	0.842235	0.119842	0.237276
Plate12	O22	NM_153819	RASGRP2	RAS guanyl releasing protein 2 (calcium and DAG-regulated)	0.797523	0.172749	0.274725
Plate12	P01	NM_006861	RAB35	RAB35, member RAS oncogene family	0.848953	0.254801	0.326561
Plate12	P02	NM_175738	RAB37	RAB37, member RAS oncogene family	0.715478	0.0186879	0.121935
Plate12	P03	NM_171998	RAB39B	RAB39B, member RAS oncogene family	0.703926	0.00978297	0.101317
Plate12	P04	NM_006822	RAB40B	RAB40B, member RAS oncogene family	0.672403	0.082899	0.205111
Plate12	P05	NM_004162	RAB5A	RAB5A, member RAS oncogene family	0.845973	0.0257136	0.136349
Plate12	P06	NM_004583	RAB5C	RAB5C, member RAS oncogene family	0.82234	0.225146	0.30679
Plate12	P07	NM_016577	RAB6B	RAB6B, member RAS oncogene family	0.780284	0.0397779	0.158881
Plate12	P08	NM_003929	RAB7L1	RAB7, member RAS oncogene family-like 1	0.859843	0.217765	0.301875
Plate12	P09	NM_016370	RAB9B	RAB9B, member RAS oncogene family	0.913457	0.158373	0.264514
Plate12	P10	NM_006860	RABL4	RAB, member of RAS oncogene family-like 4	0.871165	0.186426	0.281475
Plate12	P11	NM_002872	RAC2	ras-related C3 botulinum toxin substrate 2 (rho family, small GTP binding protein Rac2)	0.813946	0.0896392	0.211276
Plate12	P12	NM_005402	RALA	v-ral simian leukemia viral oncogene homolog A (ras related)	0.848452	0.155182	0.26228
Plate12	P13	NM_006325	RAN	RAN, member RAS oncogene family	0.907217	0.366076	0.402779
Plate12	P14	NM_015646	RAP1B	RAP1B, member of RAS oncogene family	0.827683	0.0354441	0.153332
Plate12	P15	NM_002886	RAP2B	RAP2B, member of RAS oncogene family	0.909276	0.00859732	0.0974481
Plate12	P16	NM_022650	RASA1	RAS p21 protein activator (GTPase activating protein) 1	1.05217	0.292522	0.351715
Plate12	P17	NM_007368	RASA3	RAS p21 protein activator 3	0.872564	0.149374	0.258478
Plate12	P18	NM_004658	RASAL1	RAS protein activator like 1 (GAP1 like)	0.835326	0.17079	0.273343
Plate12	P19	NM_016084	RASD1	RAS, dexamethasone-induced 1	0.801171	0.141878	0.254027
Plate12	P20	NM_002891	RASGRF1	Ras protein-specific guanine nucleotide-releasing factor 1	0.836756	0.025962	0.136227
Plate12	P21	NM_005739	RASGRP1	RAS guanyl releasing protein 1 (calcium and DAG-regulated)	1.10166	0.366887	0.403108
Plate12	P22	NM_033315	RASL10B	RAS-like, family 10, member B	0.854143	0.132401	0.246993
Plate13	A01	NM_016563	RASL12	RAS-like, family 12	0.684693	0.0789518	0.202234
Plate13	A02	NM_032918	RERG	RAS-like, estrogen-regulated, growth inhibitor	0.691905	0.0589797	0.181678
Plate13	A03	NM_005614	RHEB	Ras homolog enriched in brain	0.825512	0.250465	0.323862
Plate13	A04	NM_001664	RHOA	ras homolog gene family, member A	0.803703	0.0810866	0.203177
Plate13	A05	NM_175744	RHOC	ras homolog gene family, member C	0.723202	0.0679195	0.190603
Plate13	A06	NM_019034	RHOF	ras homolog gene family, member F (in filopodia)	0.715885	0.0447557	0.164263
Plate13	A07	NM_004310	RHOH	ras homolog gene family, member H	0.755507	0.0623512	0.184645
Plate13	A08	NM_012249	RHOQ	ras homolog gene family, member Q	0.826056	0.124614	0.241104
Plate13	A09	NM_133639	RHOV	ras homolog gene family, member V	0.707893	0.016196	0.115209
Plate13	A10	NM_002930	RIT2	Ras-like without CAAX 2	0.774047	0.16943	0.272509
Plate13	A11	NM_006570	RRAGA	Ras-related GTP binding A	0.674154	0.0402031	0.159655
Plate13	A12	NM_006270	RRAS	related RAS viral (r-ras) oncogene homolog	0.683529	0.102631	0.223834
Plate13	A13	NM_006477	RRP22	RRP22	0.867426	0.225549	0.307187
Plate13	A14	NM_001175	ARHGDIB	Rho GDP dissociation inhibitor (GDI) beta	0.71553	0.0239237	0.134206
Plate13	A15	NM_002067	GNA11	guanine nucleotide binding protein (G protein), alpha 11 (Gq class)	0.727156	0.0685676	0.191255
Plate13	A16	NM_006572	GNA13	guanine nucleotide binding protein (G protein), alpha 13	0.994579	0.490161	0.493649
Plate13	A17	NM_002068	GNA15	guanine nucleotide binding protein (G protein), alpha 15 (Gq class)	0.977071	0.468378	0.476492
Plate13	A18	NM_002070	GNAI2	guanine nucleotide binding protein (G protein), alpha inhibiting activity polypeptide 2	0.778739	0.0525159	0.173171
Plate13	A19	NM_182978	GNAL	guanine nucleotide binding protein (G protein), alpha activating activity polypeptide, olfactory type	0.786604	0.0883225	0.209514
Plate13	A20	NM_000172	GNAT1	guanine nucleotide binding protein (G protein), alpha transducing activity polypeptide 1	0.817967	0.0926367	0.213688
Plate13	A21	NM_198977	ARHGEF1	Rho guanine nucleotide exchange factor (GEF) 1	0.840741	0.326425	0.373521
Plate13	A22	NM_015313	ARHGEF12	Rho guanine nucleotide exchange factor (GEF) 12	0.812194	0.0676583	0.190257
Plate13	B01	NM_016544	RBJ	RBJ	0.779268	0.229632	0.309314
Plate13	B02	NM_004761	RGL2	ral guanine nucleotide dissociation stimulator-like 2	0.822302	0.180227	0.279454
Plate13	B03	NM_144593	RHEBL1	Ras homolog enriched in brain like 1	0.79759	0.138777	0.251246
Plate13	B04	NM_004040	RHOB	ras homolog gene family, member B	1.00212	0.495953	0.497033
Plate13	B05	NM_014578	RHOD	ras homolog gene family, member D	0.876088	0.316418	0.366477
Plate13	B06	NM_001665	RHOG	ras homolog gene family, member G (rho G)	0.835622	0.228794	0.308637
Plate13	B07	NM_020663	RHOJ	ras homolog gene family, member J	0.657851	0.0579348	0.180068
Plate13	B08	NM_021205	RHOU	ras homolog gene family, member U	0.733475	0.0455286	0.165232
Plate13	B09	NM_006912	RIT1	Ras-like without CAAX 1	0.756187	0.0871812	0.209235
Plate13	B10	NM_004165	RRAD	Ras-related associated with diabetes	0.79711	0.140853	0.25293
Plate13	B11	NM_016656	RRAGB	Ras-related GTP binding B	0.740101	0.00281012	0.0807909
Plate13	B12	NM_012250	RRAS2	related RAS viral (r-ras) oncogene homolog 2	0.88051	0.263179	0.331223
Plate13	B13	NM_004309	ARHGDIA	Rho GDP dissociation inhibitor (GDI) alpha	0.662461	0.0106407	0.103592
Plate13	B14	NM_001176	ARHGDIG	Rho GDP dissociation inhibitor (GDI) gamma	0.73168	0.00740488	0.0955022
Plate13	B15	NM_007353	GNA12	guanine nucleotide binding protein (G protein) alpha 12	0.693022	0.0520312	0.172603
Plate13	B16	NM_004297	GNA14	guanine nucleotide binding protein (G protein), alpha 14	0.744414	0.0438698	0.164177
Plate13	B17	NM_002069	GNAI1	guanine nucleotide binding protein (G protein), alpha inhibiting activity polypeptide 1	0.827278	0.10016	0.220799
Plate13	B18	NM_006496	GNAI3	guanine nucleotide binding protein (G protein), alpha inhibiting activity polypeptide 3	0.806945	0.266914	0.333416
Plate13	B19	NM_020988	GNAO1	guanine nucleotide binding protein (G protein), alpha activating activity polypeptide O	0.99365	0.484106	0.488979
Plate13	B20	NM_002073	GNAZ	guanine nucleotide binding protein (G protein), alpha z polypeptide	0.784128	0.0312658	0.14789
Plate13	B21	NM_014784	ARHGEF11	Rho guanine nucleotide exchange factor (GEF) 11	1.10908	0.296719	0.354521
Plate13	B22	NM_015318	ARHGEF18	rho/rac guanine nucleotide exchange factor (GEF) 18	0.729811	0.0475861	0.167203
Plate13	C01	NM_004723	ARHGEF2	rho/rac guanine nucleotide exchange factor (GEF) 2	0.723559	0.0296141	0.144026
Plate13	C02	NM_004840	ARHGEF6	Rac/Cdc42 guanine nucleotide exchange factor (GEF) 6	0.755055	0.0532545	0.173841
Plate13	C03	NM_015078	KIAA0861	MCF.2 cell line derived transforming sequence-like 2	0.726637	0.0792311	0.202292
Plate13	C04	NM_152663	RALGPS2	Ral GEF with PH domain and SH3 binding motif 2	0.777797	0.0682568	0.190967
Plate13	C05	NM_007023	RAPGEF4	Rap guanine nucleotide exchange factor (GEF) 4	0.684168	0.0365103	0.154198
Plate13	C06	NM_016340	RAPGEF6	Rap guanine nucleotide exchange factor (GEF) 6	0.764389	0.0810571	0.203287
Plate13	C07	NM_001092	ABR	active BCR-related gene	0.769786	0.106906	0.228111
Plate13	C08	NM_001658	ARF1	ADP-ribosylation factor 1	0.755911	0.167441	0.270651
Plate13	C09	NM_001660	ARF4	ADP-ribosylation factor 4	0.797287	0.0912053	0.212338
Plate13	C10	NM_001662	ARF5	ADP-ribosylation factor 5	0.807753	0.0492251	0.169509
Plate13	C11	NM_014570	ARFGAP3	ADP-ribosylation factor GTPase activating protein 3	0.692986	0.0104889	0.103576
Plate13	C12	NM_024605	ARHGAP10	Rho GTPase activating protein 10	0.862356	0.204241	0.293291
Plate13	C13	NM_001006634	ARHGAP17	Rho GTPase activating protein 17	0.795418	0.152085	0.260556
Plate13	C14	NM_015071	ARHGAP26	Rho GTPase activating protein 26	0.698124	0.106833	0.228131
Plate13	C15	NM_001173	ARHGAP5	Rho GTPase activating protein 5	0.710704	0.0681111	0.190752
Plate13	C16	NM_032496	ARHGAP9	Rho GTPase activating protein 9	0.729374	0.022797	0.131083
Plate13	C17	NM_001667	ARL2	ADP-ribosylation factor-like 2	0.590825	0.00151463	0.0760068
Plate13	C18	NM_004912	CCM1	cerebral cavernous malformations 1	0.769992	0.0277386	0.139961
Plate13	C19	NM_139181	CENTD2	centaurin, delta 2	0.757823	0.0723292	0.194665
Plate13	C20	NM_004067	CHN2	chimerin (chimaerin) 2	0.921038	0.21519	0.300493
Plate13	C21	NM_030881	DDX17	DEAD (Asp-Glu-Ala-Asp) box polypeptide 17	0.776106	0.00402118	0.0828243
Plate13	C22	NM_001005336	DNM1	dynamin 1	0.835029	0.0490368	0.169389
Plate13	D01	NM_032995	ARHGEF4	Rho guanine nucleotide exchange factor (GEF) 4	0.728019	0.106024	0.227371
Plate13	D02	NM_145735	ARHGEF7	Rho guanine nucleotide exchange factor (GEF) 7	0.733425	0.0320973	0.148017
Plate13	D03	NM_014504	RABGEF1	RAB guanine nucleotide exchange factor (GEF) 1	0.696087	0.0460027	0.165754
Plate13	D04	NM_006105	RAPGEF3	Rap guanine nucleotide exchange factor (GEF) 3	0.85004	0.106535	0.227847
Plate13	D05	NM_012294	RAPGEF5	Rap guanine nucleotide exchange factor (GEF) 5	0.724787	0.000631288	0.0711165
Plate13	D06	NM_016339	RAPGEFL1	Rap guanine nucleotide exchange factor (GEF)-like 1	0.761981	0.0927317	0.213639
Plate13	D07	NM_006738	AKAP13	A kinase (PRKA) anchor protein 13	0.80087	0.0742039	0.196359
Plate13	D08	NM_001659	ARF3	ADP-ribosylation factor 3	0.710024	0.0524149	0.173045
Plate13	D09	NM_001661	ARF4L	ADP-ribosylation factor 4-like	0.843483	0.0183794	0.120923
Plate13	D10	NM_001663	ARF6	ADP-ribosylation factor 6	0.84962	0.12623	0.242025
Plate13	D11	NM_004308	ARHGAP1	Rho GTPase activating protein 1	0.793916	0.0739818	0.196242
Plate13	D12	NM_018287	ARHGAP12	Rho GTPase activating protein 12	0.807632	0.0878473	0.209648
Plate13	D13	NM_020824	ARHGAP21	Rho GTPase activating protein 21	0.865778	0.110569	0.230404
Plate13	D14	NM_001666	ARHGAP4	Rho GTPase activating protein 4	0.841267	0.173282	0.275178
Plate13	D15	NM_181334	LOC553158	-	0.742812	0.020415	0.126194
Plate13	D16	NM_001177	ARL1	ADP-ribosylation factor-like 1	0.740435	0.00809386	0.0956705
Plate13	D17	NM_004311	ARL3	ADP-ribosylation factor-like 3	0.839835	0.00583928	0.0873519
Plate13	D18	NM_015230	CENTD1	centaurin, delta 1	0.892523	0.215949	0.300565
Plate13	D19	NM_001025201	CHN1	chimerin (chimaerin) 1	1.00494	0.49074	0.493871
Plate13	D20	NM_138709	DAB2IP	DAB2 interacting protein	0.867711	0.0386799	0.157458
Plate13	D21	NM_024767	DLC1	deleted in liver cancer 1	0.710057	0.0378645	0.155863
Plate13	D22	NM_012062	DNM1L	dynamin 1-like	0.755365	0.135506	0.249331
Plate13	E01	NM_004945	DNM2	dynamin 2	0.850425	0.275626	0.339535
Plate13	E02	NM_004463	FGD1	FYVE, RhoGEF and PH domain containing 1 (faciogenital dysplasia)	0.710623	0.0875788	0.20946
Plate13	E03	NM_033086	FGD3	FGD1 family, member 3	0.862122	0.195675	0.287344
Plate13	E04	NM_025047	FLJ22595	ADP-ribosylation factor 7	0.797653	0.280293	0.343064
Plate13	E05	NM_173527	FLJ38964	FLJ38964	0.848385	0.180508	0.279339
Plate13	E06	NM_002072	GNAQ	guanine nucleotide binding protein (G protein), q polypeptide	0.928459	0.387786	0.416536
Plate13	E07	NM_003947	HAPIP	huntingtin-associated protein interacting protein (duo)	0.822419	0.230122	0.309671
Plate13	E08	NM_006633	IQGAP2	IQ motif containing GTPase activating protein 2	0.740587	0.000274617	0.0606354
Plate13	E09	NM_181720	LOC257106	Rho GTPase activating protein 30	0.786114	0.0608404	0.183921
Plate13	E10	NM_024979	MCF2L	MCF.2 cell line derived transforming sequence-like	0.88254	0.164737	0.269277
Plate13	E11	NM_006901	MYO9A	myosin IXA	0.949012	0.390887	0.419133
Plate13	E12	NM_006155	NEDD5	septin 2	0.902561	0.103028	0.22408
Plate13	E13	NM_004815	PARG1	Rho GTPase activating protein 29	0.703977	0.0252915	0.136337
Plate13	E14	NM_016530	RAB8B	RAB8B, member RAS oncogene family	0.838295	0.0342322	0.15129
Plate13	E15	NM_006788	RALBP1	ralA binding protein 1	0.766337	0.0115112	0.106435
Plate13	E16	NM_006267	RANBP2	RAN binding protein 2	0.722175	0.184894	0.281471
Plate13	E17	NM_014012	REM1	RAS (RAD and GEM)-like GTP-binding 1	1.19172	0.254159	0.326269
Plate13	E18	NM_153615	Rgr	Rgr	0.83877	0.0734702	0.195731
Plate13	E19	NM_002925	RGS10	regulator of G-protein signalling 10	0.856823	0.0419992	0.160885
Plate13	E20	NM_012419	RGS17	regulator of G-protein signalling 17	0.737413	0.14723	0.257431
Plate13	E21	NM_005873	RGS19	regulator of G-protein signalling 19	0.894289	0.251968	0.325044
Plate13	E22	NM_198225	RHOBTB1	Rho-related BTB domain containing 1	0.739027	0.000426283	0.0619232
Plate13	F01	NM_018098	ECT2	epithelial cell transforming sequence 2 oncogene	0.653292	0.141284	0.253376
Plate13	F02	NM_173558	FGD2	FYVE, RhoGEF and PH domain containing 2	0.79351	0.076422	0.198704
Plate13	F03	NM_139241	FGD4	FYVE, RhoGEF and PH domain containing 4	0.765558	0.0589026	0.181745
Plate13	F04	NM_024730	FLJ22655	FLJ22655	0.744441	0.0319254	0.147967
Plate13	F05	NM_181702	GEM	GTP binding protein overexpressed in skeletal muscle	0.745738	0.0757773	0.197587
Plate13	F06	NM_080426	GNAS	GNAS complex locus	0.847322	0.0281948	0.140974
Plate13	F07	NM_003870	IQGAP1	IQ motif containing GTPase activating protein 1	0.900578	0.238036	0.315023
Plate13	F08	NM_178229	IQGAP3	IQ motif containing GTPase activating protein 3	0.82325	0.00906528	0.0992864
Plate13	F09	NM_005369	MCF2	MCF.2 cell line derived transforming sequence	0.921225	0.177953	0.277878
Plate13	F10	NM_152304	MGC45806	MGC45806	0.891759	0.0618684	0.184402
Plate13	F11	NM_004145	MYO9B	myosin IXB	0.782333	0.0294341	0.143912
Plate13	F12	NM_002547	OPHN1	oligophrenin 1	0.707402	0.0748591	0.197054
Plate13	F13	NM_005370	RAB8A	RAB8A, member RAS oncogene family	0.850836	0.0198343	0.124274
Plate13	F14	NM_013277	RACGAP1	Rac GTPase activating protein 1	0.761097	0.00355792	0.0808219
Plate13	F15	NM_006266	RALGDS	ral guanine nucleotide dissociation stimulator	0.697831	0.0264923	0.137441
Plate13	F16	NM_005312	RAPGEF1	Rap guanine nucleotide exchange factor (GEF) 1	0.820177	0.269617	0.335125
Plate13	F17	NM_015149	RGL1	ral guanine nucleotide dissociation stimulator-like 1	0.750431	0.00180146	0.0801939
Plate13	F18	NM_002922	RGS1	regulator of G-protein signalling 1	0.813294	0.0358529	0.152707
Plate13	F19	NM_144766	RGS13	regulator of G-protein signalling 13	0.74258	0.00474295	0.0866924
Plate13	F20	NM_130782	RGS18	regulator of G-protein signalling 18	1.07599	0.418196	0.440459
Plate13	F21	NM_033345	RGS8	regulator of G-protein signalling 8	0.817124	0.0320089	0.147981
Plate13	F22	NM_015178	RHOBTB2	Rho-related BTB domain containing 2	0.853645	0.195893	0.287511
Plate13	G01	NM_018307	RHOT1	ras homolog gene family, member T1	0.713842	0.00390924	0.0820495
Plate13	G02	NM_014715	RICS	RICS	0.870443	0.318593	0.367837
Plate13	G03	NM_015474	SAMHD1	SAM domain and HD domain 1	0.857696	0.280156	0.342972
Plate13	G04	NM_032985	SEC23B	Sec23 homolog B (S. cerevisiae)	0.965565	0.446154	0.460331
Plate13	G05	NM_018957	SH3BP1	SH3-domain binding protein 1	0.865879	0.0316941	0.147888
Plate13	G06	NM_052948	SNX26	sorting nexin 26	0.798092	0.00557789	0.0874715
Plate13	G07	NM_052851	STARD13	START domain containing 13	0.885657	0.0931277	0.213926
Plate13	G08	NM_138810	TAGAP	T-cell activation GTPase activating protein	0.997515	0.494344	0.495781
Plate13	G09	NM_001656	TRIM23	tripartite motif-containing 23	0.792601	0.0938265	0.215084
Plate13	G10	NM_003371	VAV2	vav 2 oncogene	0.841895	0.0295653	0.144043
Plate13	G11	NM_001237	CCNA2	cyclin A2	0.89173	0.18161	0.280102
Plate13	G12	NM_004701	CCNB2	cyclin B2	0.85383	0.0422798	0.161288
Plate13	G13	NM_005190	CCNC	cyclin C	0.940896	0.313025	0.364459
Plate13	G14	NM_001759	CCND2	cyclin D2	0.787714	0.0375361	0.154858
Plate13	G15	NM_057182	CCNE1	cyclin E1	0.866543	0.163401	0.268445
Plate13	G16	NM_001761	CCNF	cyclin F	0.753257	0.0754992	0.197141
Plate13	G17	NM_004354	CCNG2	cyclin G2	0.857423	0.0129186	0.108871
Plate13	G18	NM_006835	CCNI	cyclin I	0.806614	0.0015897	0.0783497
Plate13	G19	NM_001240	CCNT1	cyclin T1	0.777815	0.217875	0.301875
Plate13	G20	NM_001786	CDC2	cell division cycle 2, G1 to S and G2 to M	0.895866	0.318308	0.367662
Plate13	G21	NM_003936	CDK5R2	cyclin-dependent kinase 5, regulatory subunit 2 (p39)	0.958867	0.436785	0.453206
Plate13	G22	NM_003948	CDKL2	cyclin-dependent kinase-like 2 (CDC2-related kinase)	0.85045	0.108919	0.229566
Plate13	H01	NM_138769	RHOT2	ras homolog gene family, member T2	0.949813	0.463249	0.472406
Plate13	H02	NM_014470	RND1	Rho family GTPase 1	0.782187	0.0898251	0.211263
Plate13	H03	NM_006364	SEC23A	Sec23 homolog A (S. cerevisiae)	0.720025	0.0613878	0.184263
Plate13	H04	NM_052838	1-Sep	septin 1	0.727358	0.0080471	0.0957328
Plate13	H05	NM_153253	SIPA1	signal-induced proliferation-associated gene 1	0.847901	0.143269	0.25503
Plate13	H06	NM_005633	SOS1	son of sevenless homolog 1 (Drosophila)	0.75426	0.0770189	0.19988
Plate13	H07	NM_014725	STARD8	START domain containing 8	0.670115	0.0135495	0.110315
Plate13	H08	NM_003253	TIAM1	T-cell lymphoma invasion and metastasis 1	0.754299	0.00992271	0.101999
Plate13	H09	NM_005428	VAV1	vav 1 oncogene	0.821785	0.0407383	0.160054
Plate13	H10	NM_003914	CCNA1	cyclin A1	0.862227	0.0445664	0.164114
Plate13	H11	NM_031966	CCNB1	cyclin B1	0.904477	0.251968	0.324968
Plate13	H12	NM_033670	CCNB3	cyclin B3	0.893305	0.214746	0.300101
Plate13	H13	NM_053056	CCND1	cyclin D1 (PRAD1: parathyroid adenomatosis 1)	0.850998	0.00952969	0.100389
Plate13	H14	NM_001760	CCND3	cyclin D3	0.941605	0.19705	0.288137
Plate13	H15	NM_057749	CCNE2	cyclin E2	0.850926	0.103517	0.224173
Plate13	H16	NM_004060	CCNG1	cyclin G1	0.842193	0.0383427	0.156547
Plate13	H17	NM_001239	CCNH	cyclin H	0.80285	0.171722	0.273961
Plate13	H18	NM_020307	CCNL1	cyclin L1	0.752274	0.00208332	0.0793097
Plate13	H19	NM_058241	CCNT2	cyclin T2	0.851408	0.234242	0.312022
Plate13	H20	NM_003885	CDK5R1	cyclin-dependent kinase 5, regulatory subunit 1 (p35)	0.739875	0.0190974	0.123008
Plate13	H21	NM_004196	CDKL1	cyclin-dependent kinase-like 1 (CDC2-related kinase)	0.787447	0.00761552	0.0957578
Plate13	H22	NM_001826	CKS1B	CDC28 protein kinase regulatory subunit 1B	0.842284	0.135086	0.249057
Plate13	I01	NM_001827	CKS2	CDC28 protein kinase regulatory subunit 2	0.770557	0.165971	0.270014
Plate13	I02	NM_000961	PTGIS	prostaglandin I2 (prostacyclin) synthase	0.581609	0.0199218	0.124539
Plate13	I03	NM_181501	ITGA1	integrin, alpha 1	0.909708	0.379069	0.410851
Plate13	I04	NM_012211	ITGA11	integrin, alpha 11	0.74928	0.0550988	0.175908
Plate13	I05	NM_002206	ITGA7	integrin, alpha 7	0.894468	0.341225	0.38354
Plate13	I06	NM_002208	ITGAE	integrin, alpha E (antigen CD103, human mucosal lymphocyte antigen 1; alpha polypeptide)	0.765178	0.0157502	0.113649
Plate13	I07	NM_000887	ITGAX	integrin, alpha X (antigen CD11C (p150), alpha polypeptide)	0.873561	0.0850364	0.20715
Plate13	I08	NM_181468	ITGB4BP	integrin beta 4 binding protein	0.642271	0.0270808	0.138413
Plate13	I09	NM_000888	ITGB6	integrin, beta 6	0.805081	0.025759	0.136328
Plate13	I10	NM_002214	ITGB8	integrin, beta 8	0.859195	0.163992	0.268616
Plate13	I11	NM_031885	BBS2	Bardet-Biedl syndrome 2	0.77932	0.00482966	0.0857227
Plate13	I12	NM_018058	CRTAC1	cartilage acidic protein 1	0.825244	0.23281	0.311315
Plate13	I13	NM_001503	GPLD1	glycosylphosphatidylinositol specific phospholipase D1	0.892943	0.0314133	0.147575
Plate13	I14	NM_020676	ABHD6	abhydrolase domain containing 6	0.789174	0.0291968	0.14377
Plate13	I15	NM_019893	ASAH2	N-acylsphingosine amidohydrolase (non-lysosomal ceramidase) 2	1.00832	0.491196	0.49406
Plate13	I16	NM_001832	CLPS	colipase, pancreatic	0.805174	0.0992663	0.22006
Plate13	I17	NM_013280	FLRT1	fibronectin leucine rich transmembrane protein 1	0.858013	0.248287	0.32195
Plate13	I18	NM_000235	LIPA	lipase A, lysosomal acid, cholesterol esterase (Wolman disease)	0.959164	0.455608	0.467117
Plate13	I19	NM_005357	LIPE	lipase, hormone-sensitive	0.752421	0.0472861	0.166999
Plate13	I20	NM_006033	LIPG	lipase, endothelial	0.805473	0.0036691	0.0810137
Plate13	I21	XM_084377	LOC142910	lipase-like, ab-hydrolase domain containing 1	0.760872	0.00437915	0.0857195
Plate13	I22	NM_198996	LIPI	lipase, member I	0.908148	0.167313	0.270683
Plate13	J01	NM_005255	GAK	cyclin G associated kinase	0.843173	0.30813	0.361812
Plate13	J02	NM_004967	IBSP	integrin-binding sialoprotein (bone sialoprotein, bone sialoprotein II)	0.735163	0.00448328	0.0850437
Plate13	J03	NM_003637	ITGA10	integrin, alpha 10	0.902547	0.212768	0.29885
Plate13	J04	NM_000210	ITGA6	integrin, alpha 6	0.805774	0.148099	0.258051
Plate13	J05	NM_002207	ITGA9	integrin, alpha 9	0.858919	0.161355	0.26715
Plate13	J06	NM_002209	ITGAL	integrin, alpha L (antigen CD11A (p180), lymphocyte function-associated antigen 1; alpha polypeptide)	1.01952	0.482441	0.488011
Plate13	J07	NM_001005619	ITGB4	integrin, beta 4	0.637354	0.0133707	0.110158
Plate13	J08	NM_002213	ITGB5	integrin, beta 5	0.667097	0.264572	0.331917
Plate13	J09	NM_000889	ITGB7	integrin, beta 7	0.66844	0.120354	0.237525
Plate13	J10	XM_292573	LOC339133	LOC339133	0.760398	0.0866897	0.208964
Plate13	J11	NM_030790	CDA08	CDA08	0.709003	0.000385823	0.0591596
Plate13	J12	NM_032039	DKFZP761D0211	chromosome 16 open reading frame 9	0.673247	0.0599371	0.182792
Plate13	J13	NM_018463	MDS028	MDS028	0.8046	0.146985	0.257247
Plate13	J14	NM_000483	APOC2	apolipoprotein C-II	0.931914	0.419739	0.441326
Plate13	J15	NM_001807	CEL	carboxyl ester lipase (bile salt-stimulated lipase)	0.969453	0.415515	0.438723
Plate13	J16	NM_032824	FLJ14681	FLJ14681	0.766571	0.0142233	0.110425
Plate13	J17	NM_002087	GRN	granulin	0.851725	0.269562	0.335207
Plate13	J18	NM_000236	LIPC	lipase, hepatic	0.772399	0.0430921	0.162478
Plate13	J19	NM_004190	LIPF	lipase, gastric	0.817057	0.0700209	0.19268
Plate13	J20	NM_139248	LIPH	lipase, member H	0.774195	0.101321	0.221677
Plate13	J21	XM_291663	LOC340654	lipase-like, ab-hydrolase domain containing 3	0.916852	0.329839	0.376258
Plate13	J22	NM_000237	LPL	lipoprotein lipase	0.875529	0.197776	0.288816
Plate13	K01	NM_152465	MGC39650	MGC39650	0.96866	0.458519	0.468795
Plate13	K02	XM_070277	OC90	otoconin 90	0.665014	0.0301148	0.145055
Plate13	K03	NM_000936	PNLIP	pancreatic lipase	0.66942	0.0178941	0.119873
Plate13	K04	NM_005396	PNLIPRP2	pancreatic lipase-related protein 2	0.824389	0.0471964	0.166896
Plate13	K05	NM_020461	TUBGCP6	tubulin, gamma complex associated protein 6	1.11592	0.210693	0.297829
Plate13	K06	XM_291241	IPLA2(GAMMA)	IPLA2(GAMMA)	0.690794	0.000756365	0.0673409
Plate13	K07	NM_006330	LYPLA1	lysophospholipase I	0.797472	0.225842	0.307283
Plate13	K08	NM_012320	LYPLA3	lysophospholipase 3 (lysosomal phospholipase A2)	0.893935	0.336568	0.380864
Plate13	K09	NM_015900	PLA1A	phospholipase A1 member A	0.868411	0.372646	0.406603
Plate13	K10	NM_030821	PLA2G12A	phospholipase A2, group XIIA	0.806861	0.0446021	0.163917
Plate13	K11	NM_000928	PLA2G1B	phospholipase A2, group IB (pancreas)	0.651518	0.036521	0.154008
Plate13	K12	NM_012400	PLA2G2D	phospholipase A2, group IID	0.804859	0.116101	0.234841
Plate13	K13	NM_022819	PLA2G2F	phospholipase A2, group IIF	0.74127	0.0482256	0.168165
Plate13	K14	NM_024420	PLA2G4A	phospholipase A2, group IVA (cytosolic, calcium-dependent)	0.728509	0.00331941	0.0796658
Plate13	K15	NM_003706	PLA2G4C	phospholipase A2, group IVC (cytosolic, calcium-independent)	0.79931	0.00183606	0.0798036
Plate13	K16	NM_000929	PLA2G5	phospholipase A2, group V	0.814544	0.0444183	0.164226
Plate13	K17	NM_005084	PLA2G7	phospholipase A2, group VII (platelet-activating factor acetylhydrolase, plasma)	0.810069	0.146914	0.257368
Plate13	K18	NM_153021	PLB	phospholipase B1	0.842873	0.014282	0.110261
Plate13	K19	NM_004573	PLCB2	phospholipase C, beta 2	0.785692	0.000814573	0.0651658
Plate13	K20	NM_182797	PLCB4	phospholipase C, beta 4	0.747387	0.00205607	0.0799262
Plate13	K21	NM_133373	PLCD3	phospholipase C, delta 3	0.865353	0.0144635	0.110887
Plate13	K22	NM_016341	PLCE1	phospholipase C, epsilon 1	0.659503	0.0123266	0.107663
Plate13	L01	NM_007283	MGLL	monoglyceride lipase	0.732127	0.189828	0.283433
Plate13	L02	NM_138294	PATE	PATE	0.809886	0.111508	0.23114
Plate13	L03	NM_006229	PNLIPRP1	pancreatic lipase-related protein 1	0.882138	0.275251	0.339149
Plate13	L04	NM_030788	TM7SF4	transmembrane 7 superfamily member 4	0.852934	0.141994	0.253988
Plate13	L05	NM_148916	WBSCR21	abhydrolase domain containing 11	0.839319	0.00191455	0.0806743
Plate13	L06	XM_370777	LOC374569	LOC374569	0.933855	0.379398	0.411127
Plate13	L07	NM_007260	LYPLA2	lysophospholipase II	0.721971	0.163584	0.268425
Plate13	L08	NM_138794	LYPLAL1	lysophospholipase-like 1	0.994197	0.483093	0.488313
Plate13	L09	NM_003561	PLA2G10	phospholipase A2, group X	0.778268	0.0773359	0.200232
Plate13	L10	NM_032562	PLA2G12B	phospholipase A2, group XIIB	0.861326	0.280947	0.343331
Plate13	L11	NM_000300	PLA2G2A	phospholipase A2, group IIA (platelets, synovial fluid)	0.721986	0.00302397	0.0776387
Plate13	L12	NM_014589	PLA2G2E	phospholipase A2, group IIE	0.928472	0.148135	0.258033
Plate13	L13	NM_015715	PLA2G3	phospholipase A2, group III	0.844646	0.186211	0.281535
Plate13	L14	NM_005090	PLA2G4B	phospholipase A2, group IVB (cytosolic)	0.809518	0.140937	0.253
Plate13	L15	NM_178034	PLA2G4D	phospholipase A2, group IVD (cytosolic)	0.964725	0.415539	0.438664
Plate13	L16	NM_003560	PLA2G6	phospholipase A2, group VI (cytosolic, calcium-independent)	0.701548	0.00879722	0.098301
Plate13	L17	NM_004253	PLAA	phospholipase A2-activating protein	0.721949	0.0504363	0.171118
Plate13	L18	NM_182734	PLCB1	phospholipase C, beta 1 (phosphoinositide-specific)	0.840848	0.219335	0.303062
Plate13	L19	NM_000932	PLCB3	phospholipase C, beta 3 (phosphatidylinositol-specific)	0.878063	0.0261517	0.136832
Plate13	L20	NM_006225	PLCD1	phospholipase C, delta 1	0.782993	0.0132574	0.110046
Plate13	L21	NM_032726	PLCD4	phospholipase C, delta 4	0.762218	0.00479549	0.0865069
Plate13	L22	NM_182811	PLCG1	phospholipase C, gamma 1	0.741833	0.00522387	0.0855661
Plate13	M01	NM_002661	PLCG2	phospholipase C, gamma 2 (phosphatidylinositol-specific)	0.590021	0.035635	0.152959
Plate13	M02	NM_015184	PLCL2	phospholipase C-like 2	0.797546	0.00290719	0.0782814
Plate13	M03	NM_002662	PLD1	phospholipase D1, phophatidylcholine-specific	0.751212	0.0585012	0.180911
Plate13	M04	NM_012268	PLD3	phospholipase D3	0.872583	0.0992476	0.220107
Plate13	M05	NM_006082	K-ALPHA-1	K-ALPHA-1	1.26474	0.0631105	0.185402
Plate13	M06	NM_032525	MGC4083	tubulin, beta 6	0.835288	0.00370366	0.081451
Plate13	M07	NM_178014	OK/SW-cl.56	tubulin, beta polypeptide	0.674872	0.0853557	0.207196
Plate13	M08	NM_012263	TTLL1	tubulin tyrosine ligase-like family, member 1	0.900971	0.29734	0.354802
Plate13	M09	NM_006001	TUBA2	tubulin, alpha 2	0.857109	0.093671	0.214906
Plate13	M10	NM_025019	TUBA4	tubulin, alpha 4	0.917972	0.0736947	0.195857
Plate13	M11	NM_018943	TUBA8	tubulin, alpha 8	0.815658	0.123464	0.24014
Plate13	M12	NM_001069	TUBB	tubulin, beta 2	0.785546	0.118804	0.237007
Plate13	M13	NM_006088	TUBB2	TUBB2	0.864192	0.129933	0.245122
Plate13	M14	NM_006087	TUBB5	tubulin, beta 4	0.820108	0.0102379	0.103314
Plate13	M15	NM_016262	TUBE1	tubulin, epsilon 1	0.889856	0.246544	0.3212
Plate13	M16	NM_016437	TUBG2	tubulin, gamma 2	0.910834	0.149127	0.258456
Plate13	M17	NM_020546	ADCY2	adenylate cyclase 2 (brain)	0.845129	0.0444694	0.164305
Plate13	M18	NM_139247	ADCY4	adenylate cyclase 4	0.760504	0.0816114	0.203752
Plate13	M19	NM_001114	ADCY7	adenylate cyclase 7	0.885892	0.13035	0.245323
Plate13	M20	NM_001117	ADCYAP1	adenylate cyclase activating polypeptide 1 (pituitary)	0.781689	0.018144	0.120523
Plate13	M21	NM_002098	GUCA1B	guanylate cyclase activator 1B (retina)	0.787775	0.012969	0.108963
Plate13	M22	NM_033553	GUCA2A	guanylate cyclase activator 2A (guanylin)	0.941289	0.378522	0.4105
Plate13	N01	NM_006226	PLCL1	phospholipase C-like 1	0.772856	0.226387	0.307267
Plate13	N02	NM_033123	PLCZ1	phospholipase C, zeta 1	0.92303	0.381019	0.411993
Plate13	N03	NM_002663	PLD2	phospholipase D2	0.610103	0.00383652	0.0820837
Plate13	N04	NM_173676	PNPLA1	patatin-like phospholipase domain containing 1	0.714497	0.00800363	0.0954212
Plate13	N05	NM_145042	MGC16703	MGC16703	0.669503	0.0398338	0.15899
Plate13	N06	NM_178012	MGC8685	MGC8685	0.723516	0.0453217	0.165132
Plate13	N07	NM_153712	TTL	tubulin tyrosine ligase	0.884639	0.0665978	0.18862
Plate13	N08	NM_006000	TUBA1	tubulin, alpha 1 (testis specific)	0.782854	0.00552916	0.0869544
Plate13	N09	NM_006009	TUBA3	TUBA3	0.855086	0.0590594	0.181823
Plate13	N10	NM_032704	TUBA6	TUBA6	0.707062	0.0111843	0.106078
Plate13	N11	NM_024803	TUBAL3	tubulin, alpha-like 3	0.785864	0.00284809	0.0794014
Plate13	N12	NM_030773	TUBB1	tubulin, beta 1	0.74956	0.000378399	0.059679
Plate13	N13	NM_020040	TUBB4Q	tubulin, beta polypeptide 4, member Q	0.843781	0.166778	0.270849
Plate13	N14	NM_016261	TUBD1	tubulin, delta 1	0.926713	0.281312	0.343474
Plate13	N15	NM_001070	TUBG1	tubulin, gamma 1	1.01197	0.467773	0.476492
Plate13	N16	NM_021116	ADCY1	adenylate cyclase 1 (brain)	0.98588	0.425426	0.445354
Plate13	N17	NM_004036	ADCY3	adenylate cyclase 3	0.916881	0.145454	0.256602
Plate13	N18	NM_020983	ADCY6	adenylate cyclase 6	1.04572	0.344815	0.386238
Plate13	N19	NM_001115	ADCY8	adenylate cyclase 8 (brain)	0.841444	0.22933	0.309133
Plate13	N20	NM_000409	GUCA1A	guanylate cyclase activator 1A (retina)	0.865067	0.0865877	0.208809
Plate13	N21	NM_005459	GUCA1C	guanylate cyclase activator 1C	0.837244	0.233048	0.311408
Plate13	N22	NM_007102	GUCA2B	guanylate cyclase activator 2B (uroguanylin)	0.967643	0.411078	0.435538
Plate13	O01	NM_000855	GUCY1A2	guanylate cyclase 1, soluble, alpha 2	0.601131	0.0110279	0.105868
Plate13	O02	NM_004129	GUCY1B2	guanylate cyclase 1, soluble, beta 2	0.658032	0.00281689	0.0805659
Plate13	O03	NM_004334	BST1	bone marrow stromal cell antigen 1	0.871709	0.334912	0.379769
Plate13	O04	NM_003729	RTCD1	RNA terminal phosphate cyclase domain 1	0.978846	0.483907	0.488867
Plate13	O05	NM_001001654	MED8	mediator of RNA polymerase II transcription, subunit 8 homolog (yeast)	0.63726	0.0736672	0.195878
Plate13	O06	NM_020144	PAPOLB	poly(A) polymerase beta (testis specific)	0.848944	0.278421	0.341833
Plate13	O07	NM_002689	POLA2	polymerase (DNA directed), alpha 2 (70kD subunit)	0.767789	0.0649618	0.186571
Plate13	O08	NM_002692	POLE2	polymerase (DNA directed), epsilon 2 (p59 subunit)	0.666361	0.0723382	0.194594
Plate13	O09	NM_007195	POLI	polymerase (DNA directed) iota	0.723174	0.112357	0.231507
Plate13	O10	NM_006467	POLR3G	polymerase (RNA) III (DNA directed) polypeptide G (32kD)	0.807019	0.235173	0.312658
Plate13	O11	NM_002913	RFC1	replication factor C (activator 1) 1, 145kDa	0.792772	0.0978955	0.219133
Plate13	O12	NM_003184	TAF2	TAF2 RNA polymerase II, TATA box binding protein (TBP)-associated factor, 150kDa	0.74176	0.0118828	0.107004
Plate13	O13	NM_001086	AADAC	arylacetamide deacetylase (esterase)	0.909731	0.367943	0.403306
Plate13	O14	NM_000055	BCHE	butyrylcholinesterase	0.82543	0.127639	0.243122
Plate13	O15	NM_001266	CES1	carboxylesterase 1 (monocyte/macrophage serine esterase 1)	0.805917	0.0148117	0.112001
Plate13	O16	NM_016280	CES4	carboxylesterase 4-like	0.757654	0.01678	0.116804
Plate13	O17	NM_153343	ENPP6	ectonucleotide pyrophosphatase/phosphodiesterase 6	0.680182	0.0274232	0.139005
Plate13	O18	NM_024922	FLJ21736	FLJ21736	0.835022	0.227435	0.307706
Plate13	O19	NM_002201	ISG20	interferon stimulated gene 20kDa	0.79092	0.0278294	0.140163
Plate13	O20	NM_032526	NT5C1A	5-nucleotidase, cytosolic IA	0.935842	0.355334	0.39426
Plate13	O21	NM_006702	NTE	NTE	0.831678	0.019213	0.123464
Plate13	O22	NM_000310	PPT1	palmitoyl-protein thioesterase 1 (ceroid-lipofuscinosis, neuronal 1, infantile)	0.77536	0.0516146	0.172779
Plate13	P01	NM_000856	GUCY1A3	guanylate cyclase 1, soluble, alpha 3	0.883483	0.328702	0.375271
Plate13	P02	NM_000857	GUCY1B3	guanylate cyclase 1, soluble, beta 3	0.634083	0.15151	0.260135
Plate13	P03	NM_001775	CD38	CD38 antigen (p45)	0.583916	0.0497526	0.170686
Plate13	P04	NM_018417	SAC	SAC	0.760387	0.15215	0.260506
Plate13	P05	NM_032632	PAPOLA	poly(A) polymerase alpha	0.67132	0.0877621	0.209626
Plate13	P06	NM_022894	PAPOLG	poly(A) polymerase gamma	0.786511	0.277326	0.341021
Plate13	P07	NM_006591	POLD3	polymerase (DNA-directed), delta 3, accessory subunit	0.643179	0.0609738	0.183921
Plate13	P08	NM_006502	POLH	polymerase (DNA directed), eta	0.675939	0.18311	0.280457
Plate13	P09	NM_021974	POLR2F	polymerase (RNA) II (DNA directed) polypeptide F	0.997361	0.495592	0.496852
Plate13	P10	NM_006999	POLS	polymerase (DNA directed) sigma	0.649013	0.124514	0.241079
Plate13	P11	NM_139215	TAF15	TAF15 RNA polymerase II, TATA box binding protein (TBP)-associated factor, 68kDa	0.770301	0.249639	0.323097
Plate13	P12	NM_007344	TTF1	transcription termination factor, RNA polymerase I	0.846603	0.347519	0.388163
Plate13	P13	NM_012332	ACATE2	ACATE2	0.710024	0.23212	0.310844
Plate13	P14	NM_006085	BPNT1	3(2), 5-bisphosphate nucleotidase 1	0.720778	0.226409	0.307222
Plate13	P15	NM_198061	CES2	carboxylesterase 2 (intestine, liver)	0.711555	0.0622746	0.184914
Plate13	P16	NM_058248	DLAD	deoxyribonuclease II beta	0.822956	0.302556	0.357931
Plate13	P17	NM_001984	ESD	esterase D/formylglutathione hydrolase	0.767449	0.217394	0.301587
Plate13	P18	NM_152282	FLJ23751	acid phosphatase-like 2	0.615932	0.111324	0.231019
Plate13	P19	NM_138608	MPPE1	metallophosphoesterase 1	0.613884	0.0324861	0.148324
Plate13	P20	NM_002526	NT5E	5-nucleotidase, ecto (CD73)	0.636743	0.104861	0.226019
Plate13	P21	NM_016147	PME-1	PME-1	0.782497	0.263239	0.331224
Plate13	P22	NM_138717	PPT2	palmitoyl-protein thioesterase 2	0.911069	0.4329	0.45019
Plate14	A01	NM_183386	PTE1	peroxisomal acyl-CoA thioesterase	0.664435	0.0187156	0.121972
Plate14	A02	NM_030664	PTER	phosphotriesterase related	0.740676	0.0519944	0.172689
Plate14	A03	NM_018473	THEM2	thioesterase superfamily member 2	0.882522	0.177338	0.277941
Plate14	A04	NM_181865	BACH	BACH	0.817034	0.0613146	0.184244
Plate14	A05	NM_018248	FLJ10858	nei endonuclease VIII-like 3 (E. coli)	0.763733	0.0382199	0.156277
Plate14	A06	NM_173815	FLJ37464	FLJ37464	0.841493	0.127127	0.242565
Plate14	A07	NM_000202	IDS	iduronate 2-sulfatase (Hunter syndrome)	0.727966	0.06207	0.184704
Plate14	A08	NM_020795	NLGN2	neuroligin 2	0.709949	0.0503757	0.171228
Plate14	A09	NM_181332	NLGN4X	neuroligin 4, X-linked	0.7673	0.0356861	0.152703
Plate14	A10	NM_015170	SULF1	sulfatase 1	0.860948	0.176438	0.277317
Plate14	A11	NM_003235	TG	thyroglobulin	0.697624	0.0747681	0.197096
Plate14	A12	NM_152392	AHSA2	AHA1, activator of heat shock 90kDa protein ATPase homolog 2 (yeast)	0.762523	0.0935069	0.214619
Plate14	A13	NM_020410	ATP13A	ATPase type 13A1	0.848646	0.225691	0.307305
Plate14	A14	NM_000702	ATP1A2	ATPase, Na+/K+ transporting, alpha 2 (+) polypeptide	0.803352	0.214293	0.299847
Plate14	A15	NM_144699	ATP1A4	ATPase, Na+/K+ transporting, alpha 4 polypeptide	0.772405	0.0144754	0.110824
Plate14	A16	NM_001678	ATP1B2	ATPase, Na+/K+ transporting, beta 2 polypeptide	0.761594	0.0717739	0.194498
Plate14	A17	NM_004320	ATP2A1	ATPase, Ca++ transporting, cardiac muscle, fast twitch 1	0.721879	0.0676206	0.190248
Plate14	A18	NM_005173	ATP2A3	ATPase, Ca++ transporting, ubiquitous	0.627155	0.0140974	0.110067
Plate14	A19	NM_001683	ATP2B2	ATPase, Ca++ transporting, plasma membrane 2	0.63709	0.0351494	0.152415
Plate14	A20	NM_001001396	ATP2B4	ATPase, Ca++ transporting, plasma membrane 4	0.770609	0.0200469	0.124897
Plate14	A21	NM_000704	ATP4A	ATPase, H+/K+ exchanging, alpha polypeptide	0.787262	0.145884	0.257031
Plate14	A22	NM_001005918	ATP7B	ATPase, Cu++ transporting, beta polypeptide (Wilson disease)	0.789872	0.130659	0.245653
Plate14	B01	NM_152331	PTE2B	PTE2B	0.642553	0.0528786	0.173847
Plate14	B02	NM_147161	THEA	thioesterase, adipose associated	0.723534	0.0548737	0.175902
Plate14	B03	NM_006821	ZAP128	ZAP128	0.755499	0.0090023	0.0993853
Plate14	B04	NM_130767	CACH-1	CACH-1	0.544236	0.0455433	0.165177
Plate14	B05	NM_145024	FLJ31547	FLJ31547	0.75188	0.0754242	0.197318
Plate14	B06	NM_002076	GNS	glucosamine (N-acetyl)-6-sulfatase (Sanfilippo disease IIID)	0.833096	0.167332	0.270634
Plate14	B07	NM_014932	NLGN1	neuroligin 1	0.652444	0.0709166	0.193027
Plate14	B08	NM_018977	NLGN3	neuroligin 3	0.717109	0.0734039	0.195649
Plate14	B09	NM_014893	NLGN4Y	neuroligin 4, Y-linked	0.660856	0.00539074	0.0867548
Plate14	B10	NM_198596	SULF2	sulfatase 2	0.727998	0.0442118	0.164232
Plate14	B11	NM_080701	TREX2	three prime repair exonuclease 2	0.89571	0.317986	0.367522
Plate14	B12	NM_001676	ATP12A	ATPase, H+/K+ transporting, nongastric, alpha polypeptide	0.888602	0.110825	0.230589
Plate14	B13	NM_001001586	ATP1A1	ATPase, Na+/K+ transporting, alpha 1 polypeptide	0.766358	0.193122	0.285647
Plate14	B14	NM_152296	ATP1A3	ATPase, Na+/K+ transporting, alpha 3 polypeptide	0.697141	0.0243703	0.13439
Plate14	B15	NM_001677	ATP1B1	ATPase, Na+/K+ transporting, beta 1 polypeptide	0.826488	0.117048	0.235633
Plate14	B16	NM_001679	ATP1B3	ATPase, Na+/K+ transporting, beta 3 polypeptide	0.642017	0.00781903	0.0959135
Plate14	B17	NM_001681	ATP2A2	ATPase, Ca++ transporting, cardiac muscle, slow twitch 2	0.85658	0.138265	0.251309
Plate14	B18	NM_001682	ATP2B1	ATPase, Ca++ transporting, plasma membrane 1	0.737897	0.180335	0.279385
Plate14	B19	NM_021949	ATP2B3	ATPase, Ca++ transporting, plasma membrane 3	0.859289	0.353614	0.393142
Plate14	B20	NM_001001485	ATP2C1	ATPase, Ca++ transporting, type 2C, member 1	0.742921	0.0399618	0.159155
Plate14	B21	NM_000052	ATP7A	ATPase, Cu++ transporting, alpha polypeptide (Menkes syndrome)	0.699007	0.00541863	0.0861984
Plate14	B22	NM_198531	ATP9B	ATPase, Class II, type 9B	0.75761	0.1819	0.280002
Plate14	C01	NM_022089	HSA9947	ATPase type 13A2	0.907957	0.336119	0.380512
Plate14	C02	NM_002803	PSMC2	proteasome (prosome, macropain) 26S subunit, ATPase, 2	0.747159	0.0855936	0.2075
Plate14	C03	NM_153001	PSMC4	proteasome (prosome, macropain) 26S subunit, ATPase, 4	0.810296	0.183469	0.280384
Plate14	C04	NM_002806	PSMC6	proteasome (prosome, macropain) 26S subunit, ATPase, 6	0.890063	0.0825112	0.205163
Plate14	C05	NM_002811	PSMD7	proteasome (prosome, macropain) 26S subunit, non-ATPase, 7 (Mov34 homolog)	0.881961	0.111339	0.230962
Plate14	C06	NM_000249	MLH1	mutL homolog 1, colon cancer, nonpolyposis type 2 (E. coli)	0.821338	0.0356548	0.152925
Plate14	C07	NM_014429	MORC	microrchidia homolog (mouse)	0.687453	0.0645775	0.18634
Plate14	C08	NM_001018040	PMS2	PMS2 postmeiotic segregation increased 2 (S. cerevisiae)	0.731146	0.0869358	0.209009
Plate14	C09	NM_003299	TRA1	tumor rejection antigen (gp96) 1	0.730905	0.0460263	0.165515
Plate14	C10	NM_024657	ZCWCC2	zinc finger, CW type with coiled-coil domain 2	0.861171	0.214667	0.300066
Plate14	C11	NM_014501	UBE2S	ubiquitin-conjugating enzyme E2S	0.699276	0.0473931	0.167056
Plate14	C12	NM_003355	UCP2	uncoupling protein 2 (mitochondrial, proton carrier)	0.726962	0.00159968	0.0781435
Plate14	C13	NM_145305	LOC203427	LOC203427	0.943969	0.377525	0.409901
Plate14	C14	NM_020344	SLC24A2	solute carrier family 24 (sodium/potassium/calcium exchanger), member 2	0.793276	0.0834262	0.205403
Plate14	C15	NM_153647	SLC24A4	solute carrier family 24 (sodium/potassium/calcium exchanger), member 4	0.758343	0.0301649	0.145044
Plate14	C16	NM_003705	SLC25A12	solute carrier family 25 (mitochondrial carrier, Aralar), member 12	0.835433	0.182246	0.279989
Plate14	C17	NM_022810	SLC25A14	solute carrier family 25 (mitochondrial carrier, brain), member 14	0.78262	0.159499	0.26535
Plate14	C18	NM_031481	SLC25A18	solute carrier family 25 (mitochondrial carrier), member 18	0.718491	0.101697	0.222148
Plate14	C19	NM_000387	SLC25A20	solute carrier family 25 (carnitine/acylcarnitine translocase), member 20	0.767169	0.0234035	0.132636
Plate14	C20	NM_002635	SLC25A3	solute carrier family 25 (mitochondrial carrier; phosphate carrier), member 3	0.700658	0.097495	0.218858
Plate14	C21	NM_001152	SLC25A5	solute carrier family 25 (mitochondrial carrier; adenine nucleotide translocator), member 5	0.677487	0.0147472	0.111666
Plate14	C22	NM_133489	SLC26A10	solute carrier family 26, member 10	0.799875	0.0241854	0.134174
Plate14	D01	NM_002802	PSMC1	proteasome (prosome, macropain) 26S subunit, ATPase, 1	0.823878	0.138621	0.251211
Plate14	D02	NM_002804	PSMC3	proteasome (prosome, macropain) 26S subunit, ATPase, 3	0.802131	0.092127	0.213046
Plate14	D03	NM_002805	PSMC5	proteasome (prosome, macropain) 26S subunit, ATPase, 5	0.856586	0.0466063	0.166086
Plate14	D04	NM_005805	PSMD14	proteasome (prosome, macropain) 26S subunit, non-ATPase, 14	0.843235	0.107693	0.228641
Plate14	D05	NM_007355	HSPCB	heat shock 90kDa protein 1, beta	0.694697	0.0443534	0.164096
Plate14	D06	NM_014381	MLH3	mutL homolog 3 (E. coli)	0.820386	0.0115105	0.106607
Plate14	D07	NM_000534	PMS1	PMS1 postmeiotic segregation increased 1 (S. cerevisiae)	0.768114	0.0562558	0.177751
Plate14	D08	NM_005395	PMS2L9	postmeiotic segregation increased 2-like 3	0.855512	0.197087	0.288114
Plate14	D09	NM_016292	TRAP1	TNF receptor-associated protein 1	0.70954	0.0853077	0.207262
Plate14	D10	NM_138967	SCAMP5	secretory carrier membrane protein 5	0.764373	0.0101145	0.103393
Plate14	D11	NM_021833	UCP1	uncoupling protein 1 (mitochondrial, proton carrier)	0.725705	0.0867258	0.20896
Plate14	D12	NM_003356	UCP3	uncoupling protein 3 (mitochondrial, proton carrier)	0.809756	0.0320324	0.147842
Plate14	D13	NM_004727	SLC24A1	solute carrier family 24 (sodium/potassium/calcium exchanger), member 1	0.753614	3.04457e-05	0.0560201
Plate14	D14	NM_020689	SLC24A3	solute carrier family 24 (sodium/potassium/calcium exchanger), member 3	0.718526	0.0139351	0.109888
Plate14	D15	NM_003562	SLC25A11	solute carrier family 25 (mitochondrial carrier; oxoglutarate carrier), member 11	0.774376	0.0937827	0.215073
Plate14	D16	NM_014251	SLC25A13	solute carrier family 25, member 13 (citrin)	0.758213	0.21271	0.298844
Plate14	D17	NM_152707	SLC25A16	solute carrier family 25 (mitochondrial carrier; Graves disease autoantigen), member 16	0.553513	0.0829127	0.205053
Plate14	D18	NM_021734	SLC25A19	solute carrier family 25 (mitochondrial deoxynucleotide carrier), member 19	0.690346	0.0463213	0.166143
Plate14	D19	NM_004277	SLC25A27	solute carrier family 25, member 27	0.859502	0.0804654	0.202632
Plate14	D20	NM_001151	SLC25A4	solute carrier family 25 (mitochondrial carrier; adenine nucleotide translocator), member 4	0.893403	0.324089	0.372159
Plate14	D21	NM_001636	SLC25A6	solute carrier family 25 (mitochondrial carrier; adenine nucleotide translocator), member 6	0.78745	0.108285	0.229104
Plate14	D22	NM_003052	SLC34A1	solute carrier family 34 (sodium phosphate), member 1	0.674122	0.0120129	0.107823
Plate14	E01	NM_006424	SLC34A2	solute carrier family 34 (sodium phosphate), member 2	0.718005	0.0855376	0.207455
Plate14	E02	NM_001012664	SLC3A2	solute carrier family 3 (activators of dibasic and neutral amino acid transport), member 2	0.795916	0.222311	0.304732
Plate14	E03	NM_003047	SLC9A1	solute carrier family 9 (sodium/hydrogen exchanger), isoform 1 (antiporter, Na+/H+, amiloride sensitive)	0.703418	0.125915	0.241841
Plate14	E04	NM_004174	SLC9A3	solute carrier family 9 (sodium/hydrogen exchanger), isoform 3	0.715966	0.121793	0.238573
Plate14	E05	NM_004785	SLC9A3R2	solute carrier family 9 (sodium/hydrogen exchanger), isoform 3 regulator 2	0.752235	0.101611	0.222047
Plate14	E06	NM_006359	SLC9A6	solute carrier family 9 (sodium/hydrogen exchanger), isoform 6	0.746915	0.0239373	0.134146
Plate14	E07	NM_173653	SLC9A9	solute carrier family 9 (sodium/hydrogen exchanger), isoform 9	0.826355	0.145993	0.256977
Plate14	E08	NM_000384	APOB	apolipoprotein B (including Ag(x) antigen)	0.758493	0.000766983	0.0672024
Plate14	E09	NM_001651	AQP5	aquaporin 5	0.841811	0.0263622	0.137282
Plate14	E10	NM_001725	BPI	bactericidal/permeability-increasing protein	0.823136	0.0634331	0.185265
Plate14	E11	NM_004378	CRABP1	cellular retinoic acid binding protein 1	0.774687	0.00036607	0.0594326
Plate14	E12	NM_031291	DKFZP434N1235	solute carrier family 25 (mitochondrial carrier; adenine nucleotide translocator), member 31	0.871704	0.0639633	0.186124
Plate14	E13	NM_000134	FABP2	fatty acid binding protein 2, intestinal	0.770771	0.0136306	0.110162
Plate14	E14	NM_001442	FABP4	fatty acid binding protein 4, adipocyte	0.737162	0.100026	0.220769
Plate14	E15	NM_001445	FABP6	fatty acid binding protein 6, ileal (gastrotropin)	0.634237	0.0336435	0.150863
Plate14	E16	NM_018155	FLJ10618	solute carrier family 25, member 36	0.785297	0.0534133	0.174153
Plate14	E17	NM_004139	LBP	lipopolysaccharide binding protein	0.78699	0.0190103	0.122877
Plate14	E18	NM_005564	LCN2	lipocalin 2 (oncogene 24p3)	0.762649	0.091452	0.212286
Plate14	E19	NM_000253	MTP	microsomal triglyceride transfer protein (large polypeptide, 88kDa)	0.781474	0.0885479	0.209599
Plate14	E20	NM_014581	OBP2B	odorant binding protein 2B	0.729573	0.0180279	0.120041
Plate14	E21	NM_001003812	OSBP2	oxysterol binding protein 2	0.718159	0.101264	0.221817
Plate14	E22	NM_022776	OSBPL11	oxysterol binding protein-like 11	0.790467	0.182489	0.280128
Plate14	F01	NM_173073	SLC35C2	solute carrier family 35, member C2	0.74064	0.0139529	0.109715
Plate14	F02	NM_018158	SLC4A1AP	solute carrier family 4 (anion exchanger), member 1, adaptor protein	0.767408	0.0382079	0.15646
Plate14	F03	NM_003048	SLC9A2	solute carrier family 9 (sodium/hydrogen exchanger), isoform 2	0.757684	0.0301195	0.144952
Plate14	F04	NM_004252	SLC9A3R1	solute carrier family 9 (sodium/hydrogen exchanger), isoform 3 regulator 1	0.769637	0.0972598	0.218775
Plate14	F05	NM_004594	SLC9A5	solute carrier family 9 (sodium/hydrogen exchanger), isoform 5	0.859059	0.263569	0.331337
Plate14	F06	NM_032591	SLC9A7	solute carrier family 9 (sodium/hydrogen exchanger), isoform 7	0.787935	0.0256157	0.136222
Plate14	F07	NM_005139	ANXA3	annexin A3	0.816229	0.194495	0.286526
Plate14	F08	NM_000486	AQP2	aquaporin 2 (collecting duct)	0.671975	0.015375	0.113311
Plate14	F09	NM_053286	AQP6	aquaporin 6, kidney specific	0.803718	0.00486064	0.0854482
Plate14	F10	NM_000078	CETP	cholesteryl ester transfer protein, plasma	0.840291	0.195227	0.286992
Plate14	F11	NM_001878	CRABP2	cellular retinoic acid binding protein 2	0.802967	0.0285479	0.141585
Plate14	F12	NM_001443	FABP1	fatty acid binding protein 1, liver	0.702889	0.00763707	0.0958105
Plate14	F13	NM_004102	FABP3	fatty acid binding protein 3, muscle and heart (mammary-derived growth inhibitor)	0.716315	0.021739	0.129449
Plate14	F14	NM_001444	FABP5	fatty acid binding protein 5 (psoriasis-associated)	0.748257	0.0196027	0.124091
Plate14	F15	NM_001446	FABP7	fatty acid binding protein 7, brain	0.839181	0.247665	0.322053
Plate14	F16	NM_182547	HNLF	transmembrane emp24 protein transport domain containing 4	0.62136	0.00445145	0.0856168
Plate14	F17	NM_002297	LCN1	lipocalin 1 (tear prealbumin)	0.703637	0.01496	0.112505
Plate14	F18	NM_002343	LTF	lactotransferrin	0.822791	0.296784	0.354522
Plate14	F19	NM_014582	OBP2A	odorant binding protein 2A	0.811341	0.0697683	0.192464
Plate14	F20	NM_002556	OSBP	oxysterol binding protein	0.735439	0.0356879	0.152593
Plate14	F21	NM_017784	OSBPL10	oxysterol binding protein-like 10	0.654256	8.98984e-05	0.0496239
Plate14	F22	NM_080597	OSBPL1A	oxysterol binding protein-like 1A	0.800917	0.10944	0.229437
Plate14	G01	NM_014835	OSBPL2	oxysterol binding protein-like 2	0.771456	0.14989	0.258721
Plate14	G02	NM_145798	OSBPL7	oxysterol binding protein-like 7	0.672815	0.012691	0.108109
Plate14	G03	NM_148908	OSBPL9	oxysterol binding protein-like 9	0.776695	0.00586868	0.0875544
Plate14	G04	NM_021213	PCTP	phosphatidylcholine transfer protein	0.69443	0.00350711	0.0803289
Plate14	G05	NM_021105	PLSCR1	phospholipid scramblase 1	0.703365	0.010422	0.103657
Plate14	G06	NM_020360	PLSCR3	phospholipid scramblase 3	0.794134	0.109975	0.2296
Plate14	G07	NM_006227	PLTP	phospholipid transfer protein	0.779069	0.0242393	0.134338
Plate14	G08	NM_002899	RBP1	retinol binding protein 1, cellular	0.827983	0.0441949	0.16428
Plate14	G09	NM_006744	RBP4	retinol binding protein 4, plasma	0.694686	0.00404434	0.0829916
Plate14	G10	NM_052960	RBP7	retinol binding protein 7, cellular	0.827776	0.041729	0.16063
Plate14	G11	NM_144579	SFXN5	sideroflexin 5	0.711086	0.00799092	0.095891
Plate14	G12	NM_012437	SNAPAP	SNAP-associated protein	0.71923	0.0126948	0.107975
Plate14	G13	NM_006327	TIMM23	translocase of inner mitochondrial membrane 23 homolog (yeast)	0.501591	0.00365779	0.0810883
Plate14	G14	NM_000370	TTPA	tocopherol (alpha) transfer protein (ataxia (Friedreich-like) with vitamin E deficiency)	0.775232	0.0284459	0.141206
Plate14	G15	NM_032019	HDAC10	histone deacetylase 10	0.813577	0.0207374	0.127189
Plate14	G16	NM_003883	HDAC3	histone deacetylase 3	0.764094	0.0311555	0.147748
Plate14	G17	NM_018486	HDAC8	histone deacetylase 8	0.724126	0.0254987	0.136388
Plate14	G18	NM_001111	ADAR	adenosine deaminase, RNA-specific	0.748282	0.0880108	0.209586
Plate14	G19	NM_012091	ADAT1	adenosine deaminase, tRNA-specific 1	0.832461	0.120028	0.237389
Plate14	G20	NM_000036	AMPD1	adenosine monophosphate deaminase 1 (isoform M)	0.787115	0.189885	0.283441
Plate14	G21	NM_000480	AMPD3	adenosine monophosphate deaminase (isoform E)	0.741296	0.0105684	0.103619
Plate14	G22	NM_001012732	DCTD	dCMP deaminase	0.720393	0.00017034	0.0587675
Plate14	H01	NM_145638	OSBPL5	oxysterol binding protein-like 5	0.817533	0.299457	0.35602
Plate14	H02	NM_001003712	OSBPL8	oxysterol binding protein-like 8	0.768084	0.0849331	0.207081
Plate14	H03	NM_002571	PAEP	progestagen-associated endometrial protein (placental protein 14, pregnancy-associated endometrial alpha-2-globulin, alpha uterine protein)	0.899288	0.257913	0.328567
Plate14	H04	NM_002666	PLIN	perilipin	0.815432	0.185088	0.281456
Plate14	H05	NM_020359	PLSCR2	phospholipid scramblase 2	0.732429	0.0492927	0.16953
Plate14	H06	NM_020353	PLSCR4	phospholipid scramblase 4	0.814937	0.0991932	0.220163
Plate14	H07	NM_002677	PMP2	peripheral myelin protein 2	0.822755	0.0969222	0.218461
Plate14	H08	NM_004164	RBP2	retinol binding protein 2, cellular	0.683512	0.000746208	0.0686511
Plate14	H09	NM_031491	RBP5	retinol binding protein 5, cellular	0.826393	0.0920036	0.213028
Plate14	H10	NM_022754	SFXN1	sideroflexin 1	0.729322	0.00315584	0.0784695
Plate14	H11	NM_152333	SLC25A29	solute carrier family 25, member 29	0.807314	0.0162794	0.115208
Plate14	H12	NM_012456	TIMM10	translocase of inner mitochondrial membrane 10 homolog (yeast)	0.785625	0.0810244	0.203298
Plate14	H13	NM_012460	TIMM9	translocase of inner mitochondrial membrane 9 homolog (yeast)	0.63527	0.004009	0.0831943
Plate14	H14	NM_194458	UBE2J2	ubiquitin-conjugating enzyme E2, J2 (UBC6 homolog, yeast)	0.705643	0.00844637	0.0973361
Plate14	H15	NM_001527	HDAC2	histone deacetylase 2	0.675784	0.0295379	0.144036
Plate14	H16	NM_006044	HDAC6	histone deacetylase 6	0.791159	0.0130199	0.108894
Plate14	H17	NM_000022	ADA	adenosine deaminase	0.777257	0.100814	0.221445
Plate14	H18	NM_015834	ADARB1	adenosine deaminase, RNA-specific, B1 (RED1 homolog rat)	0.809144	0.00273645	0.0795012
Plate14	H19	NM_020661	AICDA	activation-induced cytidine deaminase	0.789423	0.0506198	0.171109
Plate14	H20	NM_203404	AMPD2	adenosine monophosphate deaminase 2 (isoform L)	0.776487	0.016571	0.116229
Plate14	H21	NM_001785	CDA	cytidine deaminase	0.871852	0.162251	0.267431
Plate14	H22	NM_004293	GDA	guanine deaminase	0.831482	0.0405172	0.159754
Plate14	I01	XM_091156	LOC161823	LOC161823	0.90705	0.29908	0.355726
Plate14	I02	NM_198334	GANAB	glucosidase, alpha; neutral AB	0.73566	0.0141501	0.110012
Plate14	I03	NM_001005742	GBA	glucosidase, beta; acid (includes glucosylceramidase)	0.745845	0.0350205	0.152455
Plate14	I04	NM_006302	GCS1	GCS1	0.766396	0.177166	0.277828
Plate14	I05	NM_007011	ABHD2	abhydrolase domain containing 2	0.763122	0.0138232	0.110266
Plate14	I06	NM_022060	ABHD4	abhydrolase domain containing 4	0.799335	0.202993	0.29226
Plate14	I07	NM_173567	ABHD7	abhydrolase domain containing 7	0.744652	0.00449705	0.0847225
Plate14	I08	NM_024794	ABHD9	abhydrolase domain containing 9	0.966857	0.452788	0.464916
Plate14	I09	NM_080658	ACY3	aspartoacylase (aminocyclase) 3	0.750123	0.0279466	0.140496
Plate14	I10	NM_199162	ADPRHL1	ADP-ribosylhydrolase like 1	0.77359	0.00150431	0.0768872
Plate14	I11	NM_000687	AHCY	S-adenosylhomocysteine hydrolase	0.780855	0.0175087	0.118732
Plate14	I12	NM_000699	AMY2A	amylase, alpha 2A; pancreatic	0.805461	0.126871	0.242329
Plate14	I13	NM_001637	AOAH	acyloxyacyl hydrolase (neutrophil)	0.903675	0.373634	0.407521
Plate14	I14	NM_006789	APOBEC2	apolipoprotein B mRNA editing enzyme, catalytic polypeptide-like 2	0.817805	0.00481051	0.0856582
Plate14	I15	NM_001172	ARG2	arginase, type II	0.811666	0.0360226	0.153075
Plate14	I16	NM_198709	ARSB	arylsulfatase B	0.833239	0.126871	0.242412
Plate14	I17	NM_000047	ARSE	arylsulfatase E (chondrodysplasia punctata 1)	0.769646	0.00932574	0.0999574
Plate14	I18	NM_177924	ASAH1	N-acylsphingosine amidohydrolase (acid ceramidase) 1	0.709073	0.215198	0.300429
Plate14	I19	NM_014435	ASAHL	N-acylsphingosine amidohydrolase (acid ceramidase)-like	0.798672	0.0439932	0.164305
Plate14	I20	NM_025080	ASRGL1	asparaginase like 1	0.717014	0.0569043	0.178777
Plate14	I21	NM_004328	BCS1L	BCS1-like (yeast)	0.754069	0.000868941	0.0648183
Plate14	I22	NM_004332	BPHL	biphenyl hydrolase-like (serine hydrolase; breast epithelial mucin-associated antigen)	1.02987	0.455754	0.467006
Plate14	J01	NM_000152	GAA	glucosidase, alpha; acid (Pompe disease, glycogen storage disease type II)	0.874168	0.3367	0.380935
Plate14	J02	NM_198141	GANC	glucosidase, alpha; neutral C	0.756725	0.167023	0.270848
Plate14	J03	NM_020973	GBA3	glucosidase, beta, acid 3 (cytosolic)	0.819863	0.3076	0.361266
Plate14	J04	NM_004668	MGAM	maltase-glucoamylase (alpha-glucosidase)	0.821352	0.20514	0.293969
Plate14	J05	NM_138340	ABHD3	abhydrolase domain containing 3	0.486533	0.00671425	0.0919669
Plate14	J06	NM_016006	ABHD5	abhydrolase domain containing 5	0.792607	0.15113	0.259806
Plate14	J07	NM_024527	ABHD8	abhydrolase domain containing 8	0.747791	0.00926607	0.0995111
Plate14	J08	NM_000666	ACY1	aminoacylase 1	0.595623	0.101168	0.22187
Plate14	J09	NM_001125	ADPRH	ADP-ribosylarginine hydrolase	0.79947	0.145192	0.25655
Plate14	J10	NM_024758	AGMAT	agmatine ureohydrolase (agmatinase)	0.891487	0.358043	0.39623
Plate14	J11	NM_001008221	AMY1A	amylase, alpha 1A; salivary	0.844598	0.196767	0.288105
Plate14	J12	NM_020978	AMY2B	amylase, alpha 2B; pancreatic	0.832711	0.0821012	0.204604
Plate14	J13	NM_001644	APOBEC1	apolipoprotein B mRNA editing enzyme, catalytic polypeptide 1	0.754969	0.00296625	0.0776006
Plate14	J14	NM_000045	ARG1	arginase, liver	0.85372	0.166791	0.270791
Plate14	J15	NM_000487	ARSA	arylsulfatase A	0.868258	0.262017	0.330364
Plate14	J16	NM_009589	ARSD	arylsulfatase D	0.751524	0.0333405	0.150114
Plate14	J17	NM_004042	ARSF	arylsulfatase F	0.831541	0.0989013	0.219692
Plate14	J18	NM_133492	ASAH3	N-acylsphingosine amidohydrolase (alkaline ceramidase) 3	0.741373	0.0139362	0.10974
Plate14	J19	NM_000049	ASPA	aspartoacylase (aminoacylase 2, Canavan disease)	0.770766	0.262236	0.330413
Plate14	J20	NM_032810	ATAD1	ATPase family, AAA domain containing 1	0.708775	0.149474	0.258489
Plate14	J21	NM_000057	BLM	Bloom syndrome	0.79971	0.0702835	0.192443
Plate14	J22	NM_000060	BTD	biotinidase	0.691795	0.0426862	0.161832
Plate14	K01	NM_001584	C11orf8	chromosome 11 open reading frame 8	0.933639	0.20667	0.295014
Plate14	K02	NM_016434	C20orf41	regulator of telomere elongation helicase 1	0.716418	0.204491	0.293574
Plate14	K03	NM_015944	CGI-14	CGI-14	0.770898	0.0904307	0.211605
Plate14	K04	NM_001025199	CHI3L2	chitinase 3-like 2	0.704049	0.0172486	0.118571
Plate14	K05	NM_003613	CILP	cartilage intermediate layer protein, nucleotide pyrophosphohydrolase	0.782322	0.0316099	0.147745
Plate14	K06	NM_004388	CTBS	chitobiase, di-N-acetyl-	0.616778	0.00652549	0.0905043
Plate14	K07	NM_012137	DDAH1	dimethylarginine dimethylaminohydrolase 1	0.815014	0.0988025	0.219738
Plate14	K08	NM_004939	DDX1	DEAD (Asp-Glu-Ala-Asp) box polypeptide 1	0.747288	0.185165	0.281263
Plate14	K09	NM_020414	DDX24	DEAD (Asp-Glu-Ala-Asp) box polypeptide 24	0.883668	0.0282795	0.141014
Plate14	K10	NM_138998	DDX39	DEAD (Asp-Glu-Ala-Asp) box polypeptide 39	0.836266	0.210098	0.297675
Plate14	K11	NM_019070	DDX49	DEAD (Asp-Glu-Ala-Asp) box polypeptide 49	0.746318	0.0441035	0.164161
Plate14	K12	NM_194428	DHX34	DEAH (Asp-Glu-Ala-His) box polypeptide 34	0.832225	0.137483	0.250712
Plate14	K13	NM_000792	DIO1	deiodinase, iodothyronine, type I	0.767623	0.0145443	0.11089
Plate14	K14	NM_001362	DIO3	deiodinase, iodothyronine, type III	0.728001	0.0156298	0.113372
Plate14	K15	NM_001385	DPYS	dihydropyrimidinase	0.73999	0.00623616	0.089412
Plate14	K16	NM_001387	DPYSL3	dihydropyrimidinase-like 3	0.913527	0.328377	0.375055
Plate14	K17	NM_020134	DPYSL5	dihydropyrimidinase-like 5	0.883004	0.235018	0.312527
Plate14	K18	NM_203468	ENTPD2	ectonucleoside triphosphate diphosphohydrolase 2	0.954342	0.453465	0.465351
Plate14	K19	NM_001249	ENTPD5	ectonucleoside triphosphate diphosphohydrolase 5	0.894631	0.348164	0.38857
[truncated: 3,521 more rows]

## Sheet: Dataset S4
AssayPlateID	WellName	Accession No	Gene Symbol	Full Gene Name	Avg_POC_Ratio	P-Value	FDR
Plate14	P19	NM_018324	THEDC1	thioesterase domain containing 1	0.429536	0.0209992	0.12738
Plate14	P22	NM_004666	VNN1	vanin 1	0.429964	0.0240549	0.134125
Plate14	P20	NM_080911	UNG	uracil-DNA glycosylase	0.445721	0.0154252	0.112927
Plate14	P21	XM_165973	USP24	ubiquitin specific protease 24	0.454884	0.0314827	0.14765
Plate2	I01	NM_021970	MAP2K1IP1	mitogen-activated protein kinase kinase 1 interacting protein 1	0.468592	0.0403303	0.159586
Plate15	C01	NM_002933	RNASE1	ribonuclease, RNase A family, 1 (pancreatic)	0.46994	0.0133807	0.109913
Plate14	P16	NM_153189	SPAM1	sperm adhesion molecule 1 (PH-20 hyaluronidase, zona pellucida binding)	0.486478	0.0415279	0.160528
Plate14	J05	NM_138340	ABHD3	abhydrolase domain containing 3	0.486533	0.00671425	0.0919669
Plate14	P18	NM_013251	TAC3	tachykinin 3 (neuromedin K, neurokinin beta)	0.491723	0.0279567	0.14042
Plate14	G13	NM_006327	TIMM23	translocase of inner mitochondrial membrane 23 homolog (yeast)	0.501591	0.00365779	0.0810883
Plate9	P21	NM_003841	TNFRSF10C	tumor necrosis factor receptor superfamily, member 10c, decoy without an intracellular domain	0.51222	0.0140413	0.110097
Plate11	O03	NM_172236	POFUT1	protein O-fucosyltransferase 1	0.521361	0.0160409	0.114697
Plate11	P07	NM_003799	RNMT	RNA (guanine-7-) methyltransferase	0.521828	0.0118005	0.106785
Plate8	B07	NM_003839	TNFRSF11A	tumor necrosis factor receptor superfamily, member 11a, activator of NFKB	0.521925	0.0147432	0.111789
Plate16	I10	NM_001025243	IRAK1	interleukin-1 receptor-associated kinase 1	0.524453	0.00531683	0.0860671
Plate15	A12	NM_005718	ARPC4	actin related protein 2/3 complex, subunit 4, 20kDa	0.526481	0.0136158	0.110204
Plate15	P01	NM_002309	LIF	leukemia inhibitory factor (cholinergic differentiation factor)	0.534791	0.0026576	0.081955
Plate10	P01	NM_173353	TPH2	tryptophan hydroxylase 2	0.5355	0.0315239	0.147593
Plate3	A01	NM_012125	CHRM5	cholinergic receptor, muscarinic 5	0.535567	0.0201234	0.125092
Plate3	N07	NM_012360	OR1F1	olfactory receptor, family 1, subfamily F, member 1	0.540527	0.0168029	0.116669
Plate14	O19	NM_003211	TDG	thymine-DNA glycosylase	0.541857	0.00344621	0.0806063
Plate14	B04	NM_130767	CACH-1	CACH-1	0.544236	0.0455433	0.165177
Plate1	P18	NM_005762	TRIM28	tripartite motif-containing 28	0.54506	0.028319	0.140956
Plate11	H06	NM_001876	CPT1A	carnitine palmitoyltransferase 1A (liver)	0.54638	0.0023785	0.0805481
Plate3	A02	NM_033181	CNR1	cannabinoid receptor 1 (brain)	0.548978	0.00847677	0.0972802
Plate10	P03	NM_017686	GDAP2	ganglioside induced differentiation associated protein 2	0.549408	0.0317187	0.147878
Plate2	A12	NM_145910	NEK11	NIMA (never in mitosis gene a)- related kinase 11	0.551522	0.000680233	0.0682706
Plate12	B01	NM_014465	SULT1B1	sulfotransferase family, cytosolic, 1B, member 1	0.552147	0.0173686	0.118951
Plate14	P05	NM_012387	PADI4	peptidyl arginine deiminase, type IV	0.552576	0.0187445	0.122016
Plate2	P05	NM_001702	BAI1	brain-specific angiogenesis inhibitor 1	0.55673	7.65787e-05	0.0528393
Plate14	P02	NM_199040	NUDT4	nudix (nucleoside diphosphate linked moiety X)-type motif 4	0.557359	0.0072567	0.0949217
Plate15	A04	NM_024608	NEIL1	nei endonuclease VIII-like 1 (E. coli)	0.559401	0.0324636	0.148344
Plate9	P15	NM_003227	TFR2	transferrin receptor 2	0.559842	0.00599888	0.0878351
Plate11	N03	NM_012214	MGAT4A	mannosyl (alpha-1,3-)-glycoprotein beta-1,4-N-acetylglucosaminyltransferase, isoenzyme A	0.560189	0.0103896	0.103896
Plate1	P03	NM_001184	ATR	ataxia telangiectasia and Rad3 related	0.561075	0.0363013	0.153433
Plate9	P19	NM_003268	TLR5	toll-like receptor 5	0.563577	0.00431762	0.085424
Plate14	P15	NM_003071	SMARCA3	SWI/SNF related, matrix associated, actin dependent regulator of chromatin, subfamily a, member 3	0.564168	0.0291905	0.143868
Plate15	D01	NM_002934	RNASE2	ribonuclease, RNase A family, 2 (liver, eosinophil-derived neurotoxin)	0.564992	0.00115804	0.0718247
Plate14	P06	NM_002572	PAFAH1B2	platelet-activating factor acetylhydrolase, isoform Ib, beta subunit 30kDa	0.565112	0.0373269	0.155271
Plate10	G06	NM_001866	COX7B	cytochrome c oxidase subunit VIIb	0.565778	0.0222086	0.130278
Plate10	D08	NM_003272	TM7SF1	transmembrane 7 superfamily member 1 (upregulated in kidney)	0.569465	0.0455148	0.165291
Plate2	P15	NM_005508	CCR4	chemokine (C-C motif) receptor 4	0.569924	0.000630615	0.0740637
Plate4	I22	NM_006714	SMPDL3A	sphingomyelin phosphodiesterase, acid-like 3A	0.571885	0.0153518	0.113291
Plate11	I06	NM_153446	GALGT2	UDP-GalNAc:Neu5Acalpha2-3Galbeta-R beta1,4-N-acetylgalactosaminyltransferase	0.572873	0.0011754	0.0705242
Plate14	O21	NM_001024592	UNG2	uracil-DNA glycosylase 2	0.573615	5.9719e-05	0.0470927
Plate12	K01	NM_001002019	PUS1	pseudouridylate synthase 1	0.57472	0.00171257	0.0807981
Plate9	H17	NM_024342	GRLF1	glucocorticoid receptor DNA binding factor 1	0.575298	0.00342539	0.080804
Plate10	D19	NM_000814	GABRB3	gamma-aminobutyric acid (GABA) A receptor, beta 3	0.57576	0.0415214	0.160615
Plate14	P12	NM_000536	RAG2	recombination activating gene 2	0.575804	0.0125883	0.108068
Plate11	F10	NM_007255	B4GALT7	xylosylprotein beta 1,4-galactosyltransferase, polypeptide 7 (galactosyltransferase I)	0.575962	0.000584722	0.0733561
Plate12	A01	NM_177552	SULT1A3	sulfotransferase family, cytosolic, 1A, phenol-preferring, member 3	0.57701	0.000668022	0.0695751
Plate16	E03	NM_003650	CST7	cystatin F (leukocystatin)	0.579688	0.0174241	0.119036
Plate2	H03	NM_023018	FLJ13052	NAD kinase	0.581448	0.0020006	0.0824126
Plate13	I02	NM_000961	PTGIS	prostaglandin I2 (prostacyclin) synthase	0.581609	0.0199218	0.124539
Plate11	I03	NM_000150	FUT6	fucosyltransferase 6 (alpha (1,3) fucosyltransferase)	0.582778	0.0218182	0.129641
Plate13	P03	NM_001775	CD38	CD38 antigen (p45)	0.583916	0.0497526	0.170686
Plate11	N13	NM_170706	NMNAT2	nicotinamide nucleotide adenylyltransferase 2	0.586557	0.015877	0.114116
Plate4	O16	NM_014058	DESC1	transmembrane protease, serine 11E	0.58674	0.0331931	0.149694
Plate4	E14	NM_000926	PGR	progesterone receptor	0.587029	9.71533e-05	0.0446905
Plate16	H09	NM_138578	BCL2L1	BCL2-like 1	0.587482	0.0149647	0.112388
Plate14	O17	NM_145207	SPATA5	spermatogenesis associated 5	0.588114	0.00776684	0.0959127
Plate2	K01	NM_004566	PFKFB3	6-phosphofructo-2-kinase/fructose-2,6-biphosphatase 3	0.588866	0.0136729	0.109861
Plate1	J22	NM_004443	EPHB3	EPH receptor B3	0.589678	0.0187482	0.121897
Plate13	M01	NM_002661	PLCG2	phospholipase C, gamma 2 (phosphatidylinositol-specific)	0.590021	0.035635	0.152959
Plate10	N01	NM_006894	FMO3	flavin containing monooxygenase 3	0.590684	0.0300392	0.145071
Plate13	C17	NM_001667	ARL2	ADP-ribosylation factor-like 2	0.590825	0.00151463	0.0760068
Plate4	P05	NM_032236	USP48	ubiquitin specific protease 48	0.590978	0.0436502	0.164023
Plate9	H03	NM_018010	ESRRBL1	estrogen-related receptor beta like 1	0.596207	0.00846954	0.0973997
Plate11	P03	NM_007171	POMT1	protein-O-mannosyltransferase 1	0.596482	0.0442913	0.163976
Plate3	K01	NM_130806	LGR8	leucine-rich repeat-containing G protein-coupled receptor 8	0.596729	0.0263943	0.13732
Plate15	O01	NM_019092	KIAA1164	family with sequence similarity 63, member B	0.597091	0.014906	0.11256
Plate1	H12	NM_002754	MAPK13	mitogen-activated protein kinase 13	0.597218	0.00294063	0.0780399
Plate8	C20	NM_032595	PPP1R9B	protein phosphatase 1, regulatory subunit 9B, spinophilin	0.597285	0.019346	0.123743
Plate4	L15	NM_001003962	CAPNS1	calpain, small subunit 1	0.59768	0.0254831	0.136437
Plate11	P12	NM_174971	SIAT6	ST3 beta-galactoside alpha-2,3-sialyltransferase 3	0.598264	0.0461521	0.165751
Plate15	B15	NM_000234	LIG1	ligase I, DNA, ATP-dependent	0.599034	0.000301416	0.063993
Plate1	G18	NM_003137	SRPK1	SFRS protein kinase 1	0.599583	0.00758775	0.0960651
Plate11	A10	NM_004117	FKBP5	FK506 binding protein 5	0.600817	0.00669167	0.0921147
Plate13	O01	NM_000855	GUCY1A2	guanylate cyclase 1, soluble, alpha 2	0.601131	0.0110279	0.105868
Plate3	O05	NM_004154	P2RY6	pyrimidinergic receptor P2Y, G-protein coupled, 6	0.601188	0.0498261	0.170726
Plate14	O18	NM_000351	STS	steroid sulfatase (microsomal), arylsulfatase C, isozyme S	0.601222	0.00924471	0.0994753
Plate12	A06	NM_198951	TGM2	transglutaminase 2 (C polypeptide, protein-glutamine-gamma-glutamyltransferase)	0.601759	0.000968371	0.0685309
Plate10	L22	NM_002021	FMO1	flavin containing monooxygenase 1	0.602066	0.0229544	0.131032
Plate11	B04	NM_144581	C14orf149	chromosome 14 open reading frame 149	0.6023	0.0116555	0.106169
Plate9	D12	NM_000320	QDPR	quinoid dihydropteridine reductase	0.602997	0.00831054	0.0969856
Plate16	I15	NM_003161	RPS6KB1	ribosomal protein S6 kinase, 70kDa, polypeptide 1	0.603063	0.0273024	0.139031
Plate12	E01	NM_003918	GYG2	glycogenin 2	0.603714	0.011583	0.10621
Plate11	E05	NM_014256	B3GNT3	UDP-GlcNAc:betaGal beta-1,3-N-acetylglucosaminyltransferase 3	0.604007	0.0011821	0.0686863
Plate12	A02	NM_001056	SULT1C1	sulfotransferase family, cytosolic, 1C, member 1	0.604917	0.00173367	0.0797486
Plate15	O02	NM_022098	LOC63929	LOC63929	0.605243	0.00550138	0.0867646
Plate14	P04	NM_013358	PADI1	peptidyl arginine deiminase, type I	0.60698	0.0090657	0.0990943
Plate2	P22	NM_000741	CHRM4	cholinergic receptor, muscarinic 4	0.607206	0.0405204	0.159652
Plate12	I02	NM_181578	RFC5	replication factor C (activator 1) 5, 36.5kDa	0.607822	0.0015698	0.0780657
Plate4	P01	NM_032582	USP32	ubiquitin specific protease 32	0.608711	0.0489132	0.16928
Plate8	N10	XM_371285	LOC128102	LOC128102	0.609258	0.0073032	0.0950794
Plate15	B05	NM_130384	TREX1	three prime repair exonuclease 1	0.609336	0.0464234	0.166077
Plate11	F21	NM_018413	CHST11	carbohydrate (chondroitin 4) sulfotransferase 11	0.609436	0.00222495	0.0802728
Plate16	H07	NM_016616	TXNDC3	thioredoxin domain containing 3 (spermatozoa)	0.609626	0.0115702	0.106268
Plate13	N03	NM_002663	PLD2	phospholipase D2	0.610103	0.00383652	0.0820837
Plate14	P01	NM_147173	NUDT2	nudix (nucleoside diphosphate linked moiety X)-type motif 2	0.610435	0.030907	0.147075
Plate12	E05	NM_005518	HMGCS2	3-hydroxy-3-methylglutaryl-Coenzyme A synthase 2 (mitochondrial)	0.611468	0.0268483	0.13812
Plate12	F07	NM_020378	KLP1	KLP1	0.612694	0.00177882	0.0804841
Plate2	C08	NM_003390	WEE1	WEE1 homolog (S. pombe)	0.613804	0.0118051	0.106652
Plate13	P19	NM_138608	MPPE1	metallophosphoesterase 1	0.613884	0.0324861	0.148324
Plate12	A05	NM_000353	TAT	tyrosine aminotransferase	0.615731	0.00207679	0.080167
Plate3	F11	NM_153002	GPR156	G protein-coupled receptor 156	0.6165	0.0403791	0.159437
Plate14	K06	NM_004388	CTBS	chitobiase, di-N-acetyl-	0.616778	0.00652549	0.0905043
Plate14	P14	NM_000199	SGSH	N-sulfoglucosamine sulfohydrolase (sulfamidase)	0.618577	0.00912766	0.0995745
Plate1	P17	NM_153809	TAF1L	TAF1-like RNA polymerase II, TATA box binding protein (TBP)-associated factor, 210kDa	0.619587	0.0494498	0.169964
Plate4	C10	NM_033294	CASP1	caspase 1, apoptosis-related cysteine protease (interleukin 1, beta, convertase)	0.62048	0.00357048	0.0807748
Plate14	F16	NM_182547	HNLF	transmembrane emp24 protein transport domain containing 4	0.62136	0.00445145	0.0856168
Plate10	N08	NM_003986	BBOX1	butyrobetaine (gamma), 2-oxoglutarate dioxygenase (gamma-butyrobetaine hydroxylase) 1	0.622305	0.0239427	0.13404
Plate15	M06	NM_025227	BPIL1	bactericidal/permeability-increasing protein-like 1	0.625613	0.0049732	0.0852548
Plate11	C21	NM_007041	ATE1	arginyltransferase 1	0.626082	0.0115264	0.10622
Plate11	G05	NM_016347	CML2	CML2	0.626722	0.0111975	0.106021
Plate11	I22	NM_005309	GPT	glutamic-pyruvate transaminase (alanine aminotransferase)	0.626783	0.00118135	0.069373
Plate14	A18	NM_005173	ATP2A3	ATPase, Ca++ transporting, ubiquitous	0.627155	0.0140974	0.110067
Plate9	H13	NM_020960	GPR107	G protein-coupled receptor 107	0.627281	0.00334741	0.0796453
Plate5	I12	NM_197941	ADAMTS6	a disintegrin-like and metalloprotease (reprolysin type) with thrombospondin type 1 motif, 6	0.627476	0.0445869	0.16397
Plate15	G02	NM_183415	UBE3B	ubiquitin protein ligase E3B	0.627614	0.0092349	0.0995638
Plate9	I05	NM_172234	IL17RB	interleukin 17 receptor B	0.629036	0.0372194	0.15494
Plate11	B09	NM_002014	FKBP4	FK506 binding protein 4, 59kDa	0.629863	0.000313288	0.0617624
Plate2	P09	NM_004054	C3AR1	complement component 3a receptor 1	0.63071	0.0154231	0.113062
Plate4	B18	NM_138327	TRAR1	trace amine receptor 1	0.631346	0.00548553	0.0867625
Plate11	M04	NM_014275	MGAT4B	mannosyl (alpha-1,3-)-glycoprotein beta-1,4-N-acetylglucosaminyltransferase, isoenzyme B	0.631641	0.00230324	0.0804675
Plate16	L01	NM_000875	IGF1R	insulin-like growth factor 1 receptor	0.633037	0.0121453	0.107268
Plate11	B05	NM_001355	DDT	D-dopachrome tautomerase	0.633879	0.0124526	0.108249
Plate14	E15	NM_001445	FABP6	fatty acid binding protein 6, ileal (gastrotropin)	0.634237	0.0336435	0.150863
Plate14	H13	NM_012460	TIMM9	translocase of inner mitochondrial membrane 9 homolog (yeast)	0.63527	0.004009	0.0831943
Plate11	L16	NM_170705	ICMT	isoprenylcysteine carboxyl methyltransferase	0.635702	0.00351399	0.0801539
Plate10	C03	NM_005373	MPL	myeloproliferative leukemia virus oncogene	0.636112	0.0293957	0.143851
Plate8	E07	NM_005605	PPP3CC	protein phosphatase 3 (formerly 2B), catalytic subunit, gamma isoform (calcineurin A gamma)	0.636323	0.00031407	0.0597816
Plate14	A19	NM_001683	ATP2B2	ATPase, Ca++ transporting, plasma membrane 2	0.63709	0.0351494	0.152415
Plate3	N01	NM_001008505	OPRM1	opioid receptor, mu 1	0.637172	0.00427756	0.0852424
Plate13	J07	NM_001005619	ITGB4	integrin, beta 4	0.637354	0.0133707	0.110158
Plate14	O20	NM_007180	TREH	trehalase (brush-border membrane glycoprotein)	0.637409	0.00070803	0.0685671
Plate11	O04	NM_013382	POMT2	protein-O-mannosyltransferase 2	0.63741	0.0389863	0.157428
Plate7	P07	NM_020438	DOLPP1	dolichyl pyrophosphate phosphatase 1	0.638045	0.0426131	0.161666
Plate11	N18	NM_022120	OXCT2	3-oxoacid CoA transferase 2	0.638353	0.00713932	0.09428
Plate5	C04	NM_006610	MASP2	mannan-binding lectin serine protease 2	0.638567	0.0236021	0.133487
Plate11	I20	NM_198066	GNPNAT1	glucosamine-phosphate N-acetyltransferase 1	0.639194	0.0135816	0.110251
Plate11	A14	NM_005471	GNPDA1	glucosamine-6-phosphate deaminase 1	0.639645	0.0373323	0.155176
Plate1	P20	NM_014911	AAK1	AP2 associated kinase 1	0.640408	0.0452324	0.164916
Plate12	F01	NM_002103	GYS1	glycogen synthase 1 (muscle)	0.640761	0.00102965	0.0710457
Plate6	B16	NM_024681	FLJ12242	potassium channel tetramerisation domain containing 17	0.641444	0.0355712	0.153042
Plate15	B16	NM_002312	LIG4	ligase IV, DNA, ATP-dependent	0.641576	0.0122672	0.107484
Plate14	B16	NM_001679	ATP1B3	ATPase, Na+/K+ transporting, beta 3 polypeptide	0.642017	0.00781903	0.0959135
Plate13	I08	NM_181468	ITGB4BP	integrin beta 4 binding protein	0.642271	0.0270808	0.138413
Plate14	P08	NM_022341	PDF	PDF	0.642692	0.0395572	0.158344
Plate11	F20	NM_003654	CHST1	carbohydrate (keratan sulfate Gal-6) sulfotransferase 1	0.64443	0.00446457	0.0855709
Plate11	K03	NM_153699	GSTA5	glutathione S-transferase A5	0.644761	0.00443092	0.0858199
Plate3	B10	NM_000797	DRD4	dopamine receptor D4	0.644792	0.0358351	0.152985
Plate11	C17	NM_000481	AMT	aminomethyltransferase (glycine cleavage system protein T)	0.645665	0.000866183	0.0654976
Plate11	B07	NM_054014	FKBP1A	FK506 binding protein 1A, 12kDa	0.645765	0.000329063	0.0567634
Plate12	A09	NM_003595	TPST2	tyrosylprotein sulfotransferase 2	0.645769	0.00634422	0.0897951
Plate2	O22	NM_000740	CHRM3	cholinergic receptor, muscarinic 3	0.645844	0.00761313	0.0959463
Plate10	P04	NM_177524	MEST	mesoderm specific transcript homolog (mouse)	0.645866	0.0428969	0.162297
Plate11	B20	NM_002676	PMM1	phosphomannomutase 1	0.64605	0.000254577	0.0610985
Plate4	A22	NM_004624	VIPR1	vasoactive intestinal peptide receptor 1	0.646072	0.0051226	0.0854283
Plate1	P13	NM_198974	PTK9	PTK9 protein tyrosine kinase 9	0.646261	0.00104101	0.0709427
Plate12	G03	NM_002691	POLD1	polymerase (DNA directed), delta 1, catalytic subunit 125kDa	0.646311	0.0396336	0.15842
Plate10	D13	NM_000750	CHRNB4	cholinergic receptor, nicotinic, beta polypeptide 4	0.646725	0.0410758	0.160466
Plate4	K07	NM_002630	PGC	progastricsin (pepsinogen C)	0.646801	0.0429236	0.162286
Plate12	L12	NM_018060	FLJ10326	isoleucine-tRNA synthetase 2, mitochondrial	0.646831	0.0338063	0.150857
Plate2	A09	NM_014413	HRI	eukaryotic translation initiation factor 2-alpha kinase 1	0.648033	0.00484983	0.0858047
Plate16	D02	NM_002542	OGG1	8-oxoguanine DNA glycosylase	0.648607	0.00200988	0.0821818
Plate16	D05	NM_178221	APG4C	APG4 autophagy 4 homolog C (S. cerevisiae)	0.649559	0.0110738	0.10594
Plate10	B14	NM_197975	BTNL3	butyrophilin-like 3	0.649617	0.0130022	0.108911
Plate11	N04	NM_002410	MGAT5	mannosyl (alpha-1,6-)-glycoprotein beta-1,6-N-acetyl-glucosaminyltransferase	0.650583	0.00774678	0.0960949
Plate2	P03	NM_022481	ARAP3	centaurin, delta 3	0.650768	0.0156172	0.113729
Plate10	K15	NM_001034	RRM2	ribonucleotide reductase M2 polypeptide	0.651066	0.0416831	0.160678
Plate10	A06	NM_152942	TNFRSF8	tumor necrosis factor receptor superfamily, member 8	0.651438	0.0193805	0.12382
Plate13	K11	NM_000928	PLA2G1B	phospholipase A2, group IB (pancreas)	0.651518	0.036521	0.154008
Plate1	L15	NM_002529	NTRK1	neurotrophic tyrosine kinase, receptor, type 1	0.651678	0.0449509	0.16476
Plate2	J07	NM_006039	MRC2	mannose receptor, C type 2	0.652199	0.00501079	0.0851064
Plate16	G01	NM_199283	LOC220686	LOC220686	0.653181	0.0464494	0.165955
Plate15	M11	NM_198584	CA13	carbonic anhydrase XIII	0.653337	0.0388229	0.157113
Plate16	I01	NM_000476	AK1	adenylate kinase 1	0.654124	0.00563234	0.0878264
Plate14	F21	NM_017784	OSBPL10	oxysterol binding protein-like 10	0.654256	8.98984e-05	0.0496239
Plate12	F14	NM_012330	MYST4	MYST histone acetyltransferase (monocytic leukemia) 4	0.654295	0.0403303	0.159472
Plate3	G02	NM_005299	GPR31	G protein-coupled receptor 31	0.656339	0.0295267	0.144109
Plate3	K02	NM_173490	LOC134285	LOC134285	0.65657	0.00233686	0.0811287
Plate1	B04	NM_001004056	GRK4	G protein-coupled receptor kinase 4	0.656953	0.0349507	0.152392
Plate12	F08	NM_052937	LOC115294	LOC115294	0.657659	0.019758	0.124219
Plate2	E17	NM_152910	DGKH	diacylglycerol kinase, eta	0.657893	0.0110532	0.105927
Plate13	O02	NM_004129	GUCY1B2	guanylate cyclase 1, soluble, beta 2	0.658032	0.00281689	0.0805659
Plate4	H09	NM_002501	NFIX	nuclear factor I/X (CCAAT-binding transcription factor)	0.658227	0.00343353	0.0806513
Plate2	M01	NM_002736	PRKAR2B	protein kinase, cAMP-dependent, regulatory, type II, beta	0.658436	0.0373593	0.155055
Plate4	E12	NM_173200	NR4A3	nuclear receptor subfamily 4, group A, member 3	0.659489	0.0120367	0.107512
Plate13	K22	NM_016341	PLCE1	phospholipase C, epsilon 1	0.659503	0.0123266	0.107663
Plate15	L08	NM_138424	KIF12	kinesin family member 12	0.660339	0.0380171	0.156141
Plate14	B09	NM_014893	NLGN4Y	neuroligin 4, Y-linked	0.660856	0.00539074	0.0867548
Plate2	D18	NM_017900	AKIP	AKIP	0.661031	0.0207875	0.127355
Plate6	C04	NM_004979	KCND1	potassium voltage-gated channel, Shal-related subfamily, member 1	0.661991	0.0375173	0.154896
Plate11	K04	NM_146421	GSTM1	glutathione S-transferase M1	0.662237	0.00631914	0.0899012
Plate4	I16	NM_002601	PDE6D	phosphodiesterase 6D, cGMP-specific, rod, delta	0.662351	0.0328282	0.148778
Plate13	B13	NM_004309	ARHGDIA	Rho GDP dissociation inhibitor (GDI) alpha	0.662461	0.0106407	0.103592
Plate2	N10	NM_020126	SPHK2	sphingosine kinase 2	0.662575	0.016916	0.117307
Plate10	I11	NM_020299	AKR1B10	aldo-keto reductase family 1, member B10 (aldose reductase)	0.662864	0.0442284	0.164073
Plate11	B18	NM_002633	PGM1	phosphoglucomutase 1	0.66288	0.00311375	0.0781268
Plate2	O02	NM_032049	AGTR1	angiotensin II receptor, type 1	0.66318	0.0139065	0.109977
Plate2	N06	NM_018339	RFK	riboflavin kinase	0.663442	0.0209674	0.127327
Plate10	H22	NM_003129	SQLE	squalene epoxidase	0.663545	0.00597083	0.0878907
Plate11	O06	NM_012413	QPCT	glutaminyl-peptide cyclotransferase (glutaminyl cyclase)	0.663632	0.0312606	0.147992
Plate12	M01	NM_017827	SARS2	seryl-tRNA synthetase 2	0.663706	0.00750419	0.095445
Plate14	L18	NM_001248	ENTPD3	ectonucleoside triphosphate diphosphohydrolase 3	0.663725	0.0301049	0.145135
Plate10	P11	NM_006849	PDIP	protein disulfide isomerase, pancreatic	0.663978	0.0138641	0.110433
Plate14	A01	NM_183386	PTE1	peroxisomal acyl-CoA thioesterase	0.664435	0.0187156	0.121972
Plate2	P21	NM_000738	CHRM1	cholinergic receptor, muscarinic 1	0.66498	0.0237905	0.134004
Plate13	K02	XM_070277	OC90	otoconin 90	0.665014	0.0301148	0.145055
Plate11	G03	NM_021615	CHST6	carbohydrate (N-acetylglucosamine 6-O) sulfotransferase 6	0.66556	0.0108472	0.104679
Plate10	N02	NM_001461	FMO5	flavin containing monooxygenase 5	0.666405	0.00498147	0.0848696
Plate1	J21	NM_004441	EPHB1	EPH receptor B1	0.666856	0.0252007	0.136113
Plate1	I17	NM_006182	DDR2	discoidin domain receptor family, member 2	0.666943	0.022541	0.130975
Plate11	K07	NM_183239	GSTO2	glutathione S-transferase omega 2	0.667527	0.0120436	0.1074
Plate2	O01	NM_000024	ADRB2	adrenergic, beta-2-, receptor, surface	0.667755	0.0190932	0.123124
Plate2	B01	NM_032294	CAMKK1	calcium/calmodulin-dependent protein kinase kinase 1, alpha	0.667877	0.00836017	0.0969498
Plate7	D15	NM_005135	SLC12A6	solute carrier family 12 (potassium/chloride transporters), member 6	0.668171	0.00399558	0.0832287
Plate11	C03	NM_003313	TSTA3	tissue specific transplantation antigen P35B	0.668747	0.0251078	0.136278
Plate13	K03	NM_000936	PNLIP	pancreatic lipase	0.66942	0.0178941	0.119873
Plate13	N05	NM_145042	MGC16703	MGC16703	0.669503	0.0398338	0.15899
Plate15	F09	NM_198400	NEDD4	neural precursor cell expressed, developmentally down-regulated 4	0.66991	0.0210623	0.127343
Plate13	H07	NM_014725	STARD8	START domain containing 8	0.670115	0.0135495	0.110315
Plate2	M14	NM_012474	UCK2	uridine-cytidine kinase 2	0.670168	0.0143033	0.110271
Plate15	A06	NM_001270	CHD1	chromodomain helicase DNA binding protein 1	0.670233	0.0295748	0.143962
Plate15	A03	NM_005107	ENDOGL1	endonuclease G-like 1	0.670277	0.030445	0.146136
Plate11	H03	NM_019886	CHST7	carbohydrate (N-acetylglucosamine 6-O) sulfotransferase 7	0.670424	0.00617521	0.089703
Plate2	A05	NM_033266	ERN2	endoplasmic reticulum to nucleus signalling 2	0.670452	0.0133505	0.110322
Plate12	J01	NM_181573	RFC4	replication factor C (activator 1) 4, 37kDa	0.6705	0.00122603	0.0683604
Plate11	B14	NM_138335	GNPDA2	glucosamine-6-phosphate deaminase 2	0.671617	0.00856202	0.0978517
Plate14	F08	NM_000486	AQP2	aquaporin 2 (collecting duct)	0.671975	0.015375	0.113311
Plate12	D01	NM_014064	AD-003	AD-003	0.672679	0.00625675	0.0894747
Plate14	G02	NM_145798	OSBPL7	oxysterol binding protein-like 7	0.672815	0.012691	0.108109
Plate11	L11	NM_198319	HRMT1L2	HMT1 hnRNP methyltransferase-like 2 (S. cerevisiae)	0.672839	0.000935436	0.0670598
Plate4	P15	NM_001911	CTSG	cathepsin G	0.673144	0.0428208	0.16212
Plate12	C08	NM_024917	CXorf34	chromosome X open reading frame 34	0.673285	0.00949735	0.100432
Plate14	D22	NM_003052	SLC34A1	solute carrier family 34 (sodium phosphate), member 1	0.674122	0.0120129	0.107823
Plate13	A11	NM_006570	RRAGA	Ras-related GTP binding A	0.674154	0.0402031	0.159655
Plate2	O15	NM_001837	CCR3	chemokine (C-C motif) receptor 3	0.674583	0.0293203	0.144121
Plate9	I14	NM_000206	IL2RG	interleukin 2 receptor, gamma (severe combined immunodeficiency)	0.67502	0.000213062	0.058805
Plate11	A19	NM_018290	PGM2	phosphoglucomutase 2	0.675095	0.039837	0.158888
Plate11	F22	NM_152889	CHST13	carbohydrate (chondroitin 4) sulfotransferase 13	0.675142	0.0253295	0.136143
Plate14	N11	NM_003549	HYAL3	hyaluronoglucosaminidase 3	0.675144	0.0103898	0.10371
Plate16	F06	NM_006528	TFPI2	tissue factor pathway inhibitor 2	0.675356	0.0413905	0.160334
Plate11	E15	NM_016591	C2GNT3	C2GNT3	0.675676	0.012223	0.107438
Plate10	E12	NM_183393	CADPS	Ca2+-dependent secretion activator	0.675738	0.0175031	0.118987
Plate14	H15	NM_001527	HDAC2	histone deacetylase 2	0.675784	0.0295379	0.144036
Plate11	I14	NM_147132	GALT	galactose-1-phosphate uridylyltransferase	0.675968	0.0319167	0.14805
Plate2	C12	NM_007202	AKAP10	A kinase (PRKA) anchor protein 10	0.676405	0.0203815	0.126127
Plate14	O09	NM_000466	PEX1	peroxisome biogenesis factor 1	0.67668	0.00266928	0.0818578
Plate3	I01	NM_023915	GPR87	G protein-coupled receptor 87	0.676777	0.0442707	0.16401
Plate16	G06	NM_032456	PCDH7	BH-protocadherin (brain-heart)	0.677443	0.00446672	0.0853159
Plate14	C21	NM_001152	SLC25A5	solute carrier family 25 (mitochondrial carrier; adenine nucleotide translocator), member 5	0.677487	0.0147472	0.111666
Plate16	A05	NM_012397	SERPINB13	serine (or cysteine) proteinase inhibitor, clade B (ovalbumin), member 13	0.677553	0.0436609	0.163951
Plate9	D19	NM_001139	ALOX12B	arachidonate 12-lipoxygenase, 12R type	0.677586	0.0242424	0.134221
Plate16	G13	NM_007181	MAP4K1	mitogen-activated protein kinase kinase kinase kinase 1	0.677874	0.0103818	0.104007
Plate14	L04	NM_003465	CHIT1	chitinase 1 (chitotriosidase)	0.677923	0.0027708	0.0800774
Plate10	H14	NM_002317	LOX	lysyl oxidase	0.677986	0.00570223	0.0879227
Plate1	P21	NM_004217	AURKB	aurora kinase B	0.678182	0.0232251	0.13176
Plate8	A11	NM_004897	MINPP1	multiple inositol polyphosphate histidine phosphatase, 1	0.678594	0.0472034	0.166814
Plate4	A18	NM_201636	TBXA2R	thromboxane A2 receptor	0.678785	0.0474841	0.167163
Plate11	C07	NM_001607	ACAA1	acetyl-Coenzyme A acyltransferase 1 (peroxisomal 3-oxoacyl-Coenzyme A thiolase)	0.679894	0.0110782	0.105799
Plate5	I01	NM_001877	CR2	complement component (3d/Epstein Barr virus) receptor 2	0.68016	0.012545	0.10837
Plate13	O17	NM_153343	ENPP6	ectonucleotide pyrophosphatase/phosphodiesterase 6	0.680182	0.0274232	0.139005
Plate11	A06	NM_021939	FKBP10	FK506 binding protein 10, 65 kDa	0.680303	0.0280914	0.140712
Plate11	N15	NM_006169	NNMT	nicotinamide N-methyltransferase	0.681028	0.00208205	0.079812
Plate1	I19	NM_182644	EPHA3	EPH receptor A3	0.681468	0.0420049	0.160796
Plate11	E22	NM_018641	CHST12	carbohydrate (chondroitin 4) sulfotransferase 12	0.681801	0.00272908	0.0801303
Plate4	E18	NM_002943	RORA	RAR-related orphan receptor A	0.681805	0.03523	0.152645
Plate12	M20	NM_032846	RAB2B	RAB2B, member RAS oncogene family	0.682579	0.0456172	0.165228
Plate9	I17	NM_002185	IL7R	interleukin 7 receptor	0.682597	0.0142672	0.110611
Plate11	E17	NM_145752	CDIPT	CDP-diacylglycerol--inositol 3-phosphatidyltransferase (phosphatidylinositol synthase)	0.683234	0.00236882	0.0807154
Plate2	A08	NM_000180	GUCY2D	guanylate cyclase 2D, membrane (retina-specific)	0.683264	0.0138959	0.11005
Plate12	E15	NM_004535	MYT1	myelin transcription factor 1	0.683469	0.00164785	0.0790968
Plate14	H08	NM_004164	RBP2	retinol binding protein 2, cellular	0.683512	0.000746208	0.0686511
Plate11	O21	NM_004863	SPTLC2	serine palmitoyltransferase, long chain base subunit 2	0.683802	0.00581955	0.0875311
Plate4	F15	NM_001001928	PPARA	peroxisome proliferative activated receptor, alpha	0.683814	0.00224519	0.0799576
Plate13	C05	NM_007023	RAPGEF4	Rap guanine nucleotide exchange factor (GEF) 4	0.684168	0.0365103	0.154198
Plate11	L06	NM_004832	GSTO1	glutathione S-transferase omega 1	0.684233	0.000838346	0.0661096
Plate8	N15	NM_173708	MTND1	NADH dehydrogenase 1	0.684518	0.0153399	0.113355
Plate12	O01	NM_031934	RAB34	RAB34, member RAS oncogene family	0.684691	0.0204471	0.126251
Plate10	F14	NM_016322	RAB14	RAB14, member RAS oncogene family	0.684742	0.0360728	0.152936
Plate1	H05	NM_001396	DYRK1A	dual-specificity tyrosine-(Y)-phosphorylation regulated kinase 1A	0.684899	0.0172747	0.118603
Plate12	A08	NM_014317	TPRT	trans-prenyltransferase	0.685356	0.00510609	0.0854109
Plate11	J06	NM_020474	GALNT1	UDP-N-acetyl-alpha-D-galactosamine:polypeptide N-acetylgalactosaminyltransferase 1 (GalNAc-T1)	0.685915	0.00285423	0.0791725
Plate3	F20	NM_005296	GPR23	G protein-coupled receptor 23	0.686044	0.0350014	0.152492
Plate11	I19	NM_018960	GNMT	glycine N-methyltransferase	0.686478	0.0373668	0.15497
Plate2	K09	NM_005026	PIK3CD	phosphoinositide-3-kinase, catalytic, delta polypeptide	0.686687	0.0238126	0.133991
Plate2	E06	NM_001800	CDKN2D	cyclin-dependent kinase inhibitor 2D (p19, inhibits CDK4)	0.686802	0.0478851	0.167295
Plate11	L04	NM_000848	GSTM2	glutathione S-transferase M2 (muscle)	0.686982	0.00097302	0.0679882
Plate10	J22	NM_018988	GFOD1	glucose-fructose oxidoreductase domain containing 1	0.687327	0.000679177	0.069427
Plate2	G05	NM_024619	FN3KRP	FN3KRP	0.687523	0.0307653	0.147289
Plate2	N01	NM_012407	PRKCABP	protein kinase C, alpha binding protein	0.687596	0.00898562	0.0994001
Plate14	O04	XM_291266	OPLAH	5-oxoprolinase (ATP-hydrolysing)	0.687876	0.000201571	0.0585618
Plate11	I04	NM_178155	FUT8	fucosyltransferase 8 (alpha (1,6) fucosyltransferase)	0.688312	0.00694816	0.0930919
Plate2	O05	NM_000054	AVPR2	arginine vasopressin receptor 2 (nephrogenic diabetes insipidus)	0.688356	0.00415513	0.0837092
Plate11	G21	NM_006657	FTCD	formiminotransferase cyclodeaminase	0.688383	0.0230971	0.131439
Plate2	A06	NM_017886	FLJ20574	unc-51-like kinase 4 (C. elegans)	0.688909	0.0236008	0.133617
Plate3	A21	NM_002029	FPR1	formyl peptide receptor 1	0.689111	0.0296266	0.14396
Plate3	M07	NM_003554	OR1E2	olfactory receptor, family 1, subfamily E, member 2	0.689288	0.0333178	0.150134
Plate4	B19	NM_175067	TRAR4	trace amine receptor 4	0.690128	0.0169436	0.117204
Plate11	L22	NM_005911	MAT2A	methionine adenosyltransferase II, alpha	0.690322	0.0011085	0.0746213
Plate14	D18	NM_021734	SLC25A19	solute carrier family 25 (mitochondrial deoxynucleotide carrier), member 19	0.690346	0.0463213	0.166143
Plate2	M19	NM_020683	ADORA3	adenosine A3 receptor	0.690356	0.0317327	0.147818
Plate9	K16	NM_002310	LIFR	leukemia inhibitory factor receptor	0.690461	0.0249986	0.135953
Plate3	P01	NM_002566	P2RY11	purinergic receptor P2Y, G-protein coupled, 11	0.690654	0.0155367	0.113293
Plate13	K06	XM_291241	IPLA2(GAMMA)	IPLA2(GAMMA)	0.690794	0.000756365	0.0673409
